# Supplementary material for: The genomic organization and expression pattern of the low-affinity Fc gamma receptors (FcγR) in the Göttingen minipig
Source: Springer Nature journal article supplement (doi:10.1007/s00251-018-01099-1), 2018-12-18
Supplement: 251_2018_1099_MOESM1_ESM.pdf [file 251_2018_1099_MOESM1_ESM.pdf]

| <b>Primer</b>    | <b>Region</b>        | <b>Orientation</b> | <b>Sequence</b>                                   |
|------------------|----------------------|--------------------|---------------------------------------------------|
| <b>JE2</b>       | <i>FCGR2A</i> Ig2    | forward            | CCAGCCTCTCCATCCCACATGCAAACC                       |
| <b>JE4</b>       | <i>FCGR2A</i> TM/Cyt | reverse            | GCAAAAAGGAGCCCCATCGCCAGGTAG                       |
| <b>JE5</b>       | <i>FCGR2A</i> 3'UTR  | reverse            | GGCCCAAGTTGCTGTTAAGTCGGGGCTG                      |
| <b>JE24</b>      | <i>FCGR3</i> Ig2     | forward            | CTTCGGAGGCTGTGAAAGTC                              |
| <b>JE26</b>      | <i>FCGR3</i> TM      | reverse            | TGATGGGATAGGTGATGGAC                              |
| <b>JE28</b>      | <i>FCGR2A</i> Ig2    | forward            | ACCCCTAGCCTGGTGTTC                                |
| <b>JE35</b>      | <i>FCGR2A</i> 5'UTR  | forward            | TGCGTACTCCAGGAGGTGATGG                            |
| <b>JE36</b>      | <i>FCGR2A</i> 5'UTR  | forward            | TGCTATTCCTGGCTCCTGTTCC                            |
| <b>JE41</b>      | <i>FCGR2A</i> intron | forward            | GGTCAGTCTCTTGGGTCAGC                              |
| <b>JE42</b>      | <i>FCGR2A</i> intron | reverse            | CCACCTAAGATGTGGTCCCAG                             |
| <b>JE47</b>      | <i>FCGR2A</i> intron | forward            | GGGCTCAATGACTGTTTGCTG                             |
| <b>JE49</b>      | <i>FCGR2A</i> intron | reverse            | CTGATCCTCCAGGGCAGTATCC                            |
| <b>JE58</b>      | <i>FCGR2A</i> intron | forward            | TCCAGGGGCCTTCTTATACTC                             |
| <b>JE61</b>      | <i>FCGR2A</i> intron | reverse            | AGCCCTCGGATGTATGAAAAG                             |
| <b>JE62</b>      | <i>FCGR2A</i> intron | forward            | TTGCTGGCCTGTTAGTACCTG                             |
| <b>JE64</b>      | <i>FCGR2A</i> intron | reverse            | GAGGAGCCTACGTTTGAATC                              |
| <b>UPM</b>       | 5' or 3' RACE        |                    | CTAATACGACTCACTATAGGGCAAGCAGTGGTATCAAC<br>GCAGAGT |
| <b>UPM-short</b> | nested primer        |                    | CTAATACGACTCACTATAGGGC                            |
