# Supplementary material for: The genomic organization and expression pattern of the low-affinity Fc gamma receptors (FcγR) in the Göttingen minipig
Source: Springer Nature journal article supplement (doi:10.1007/s00251-018-01099-1), 2018-12-18
Supplement: 251_2018_1099_MOESM2_ESM.pdf [file 251_2018_1099_MOESM2_ESM.pdf]

|                  | <b>Minipig</b>  | <b>Human</b>  | <b>Mouse</b>  |
|------------------|-----------------|---------------|---------------|
| <b>Monocytes</b> | <i>SIRPA</i>    | <i>CD14</i>   | <i>Cd14</i>   |
|                  | <i>CD14</i>     | <i>CD16</i>   | <i>Cd68</i>   |
|                  | <i>CD163</i>    | <i>CX3CR1</i> | <i>Adgre1</i> |
|                  | <i>SLA-DRB1</i> | <i>ITGAM</i>  | <i>Lgals3</i> |
|                  | <i>SLA-DRA</i>  | <i>CD163</i>  | <i>ApoE</i>   |
|                  | <i>FCN1</i>     | <i>CD68</i>   | <i>Mafb</i>   |
|                  | <i>LGMMN</i>    | <i>CD86</i>   | <i>Fcgr3</i>  |
|                  | <i>TREM1</i>    | <i>CSF1R</i>  | <i>Ly6e</i>   |
|                  | <i>CLEC4E</i>   | <i>CCR2</i>   | <i>H2-Aa</i>  |
|                  | <i>CLEC7A</i>   | <i>SELL</i>   | <i>H2-Eb1</i> |
|                  | <i>CCR2</i>     |               |               |
|                  | <i>CYP1B1</i>   |               |               |

|           | <b>Minipig</b>  | <b>Human</b>    | <b>Mouse</b>   |
|-----------|-----------------|-----------------|----------------|
| <b>DC</b> | <i>SIRPA</i>    | <i>ITGAX</i>    | <i>Itgax</i>   |
|           | <i>CD14</i>     | <i>PLAC8</i>    | <i>Thbd</i>    |
|           | <i>FLT3</i>     | <i>FCER1A</i>   | <i>Cd38</i>    |
|           | <i>ITGAX</i>    | <i>IL3RA</i>    | <i>Cd209a</i>  |
|           | <i>PLAC8</i>    | <i>CD1C</i>     | <i>Cd74</i>    |
|           | <i>FCER1A</i>   | <i>CD33</i>     | <i>Flt3</i>    |
|           | <i>CD74</i>     | <i>CD1E</i>     | <i>H2-Aa</i>   |
|           | <i>SLA-DRB1</i> | <i>HLA-DRB1</i> | <i>H2-Eb1</i>  |
|           | <i>SLA-DRA</i>  | <i>CLEC4C</i>   | <i>Ifi30</i>   |
|           | <i>CD33</i>     | <i>NRP1</i>     | <i>Napsa</i>   |
|           | <i>IFI30</i>    | <i>LY75</i>     | <i>Itgb7</i>   |
|           | <i>ITGB7</i>    | <i>ANPEP</i>    | <i>Syngn2</i>  |
|           | <i>SYNGR2</i>   |                 | <i>Clec10a</i> |
|           |                 |                 | <i>Ahr</i>     |
|           |                 | <i>Tlr13</i>    |                |
|           |                 | <i>CD24a</i>    |                |

|                | <b>Minipig</b>  | <b>Human</b>    | <b>Mouse</b>  |
|----------------|-----------------|-----------------|---------------|
| <b>B cells</b> | <i>CD79A</i>    | <i>MS4A1</i>    | <i>Cd79a</i>  |
|                | <i>CD19</i>     | <i>CD19</i>     | <i>Cd19</i>   |
|                | <i>MS4A1</i>    | <i>CD79A</i>    | <i>Cr2</i>    |
|                | <i>SLA-DRB1</i> | <i>CD40</i>     | <i>Fcer2a</i> |
|                | <i>SLA-DRA</i>  | <i>CD86</i>     | <i>CD22</i>   |
|                | <i>CD86</i>     | <i>HLA-DRB1</i> | <i>Ms4a1</i>  |
|                | <i>CD40</i>     |                 | <i>CD86</i>   |
|                |                 |                 | <i>H2-Ab1</i> |
|                |                 |                 | <i>Cd24a</i>  |
|                |                 |                 | <i>Cd38</i>   |
|                |                 | <i>CD40</i>     |               |

|                | <b>Minipig</b> | <b>Human</b> | <b>Mouse</b>  |
|----------------|----------------|--------------|---------------|
| <b>T cells</b> | <i>CD3</i>     | <i>CD3E</i>  | <i>Cd3e</i>   |
|                | <i>CD4</i>     | <i>CD4</i>   | <i>Cd3d</i>   |
|                | <i>CD8</i>     | <i>CD5</i>   | <i>CD40</i>   |
|                | <i>ITGB1</i>   | <i>IL2RA</i> | <i>CD8a</i>   |
|                | <i>CD5</i>     | <i>CCR7</i>  | <i>CD8b1</i>  |
|                | <i>FOXP3</i>   | <i>MAL</i>   | <i>CD5</i>    |
|                | <i>IL2RA</i>   |              | <i>Ms4a4b</i> |
|                | <i>CCR7</i>    |              | <i>Cd28</i>   |
|                | <i>Cd28</i>    |              | <i>Il7r</i>   |
|                | <i>Il7r</i>    |              | <i>Lef1</i>   |
|                | <i>Lef1</i>    |              | <i>Dapl1</i>  |
|                | <i>Dapl1</i>   |              |               |

|                          | <b>Minipig</b> | <b>Human</b> | <b>Mouse</b>  |
|--------------------------|----------------|--------------|---------------|
| <b>Cytotoxic T cells</b> | <i>CD3E</i>    | <i>CD3D</i>  | <i>Cd3e</i>   |
|                          | <i>CD8A</i>    | <i>CD8A</i>  | <i>Cd8a</i>   |
|                          | <i>GZMK</i>    | <i>CD8B</i>  | <i>Gzmk</i>   |
|                          | <i>GZMB</i>    | <i>GZMK</i>  | <i>Gzmm</i>   |
|                          | <i>GZMA</i>    | <i>GZMH</i>  | <i>Ccl5</i>   |
|                          | <i>GNLY</i>    | <i>GZMA</i>  | <i>S100a6</i> |
|                          | <i>CCL5</i>    | <i>CCL5</i>  | <i>Lgals1</i> |
|                          | <i>Klrk1</i>   |              | <i>Klrk1</i>  |
|                          | <i>Lgals1</i>  |              | <i>Crtam</i>  |
|                          | <i>Crtam</i>   |              | <i>Eomes</i>  |
|                          | <i>Eomes</i>   |              |               |
|                          | <i>GZMH</i>    |              |               |
|                          | <i>Gzmm</i>    |              |               |
|                          | <i>S100a6</i>  |              |               |

|                 | <b>Minipig</b> | <b>Human</b>  | <b>Mouse</b>  |
|-----------------|----------------|---------------|---------------|
| <b>NK cells</b> | <i>KLRB1</i>   | <i>NCR1</i>   | <i>Ncr1</i>   |
|                 | <i>NCR1</i>    | <i>NCAM1</i>  | <i>Klrb1c</i> |
|                 | <i>PRF1</i>    | <i>NCR3</i>   | <i>Klrd1</i>  |
|                 | <i>GZMA</i>    | <i>KLRC1</i>  | <i>Klrc1</i>  |
|                 | <i>GZMB</i>    | <i>KLRD1</i>  | <i>Klrk1</i>  |
|                 | <i>GNLY</i>    | <i>B3GAT1</i> | <i>Itga2</i>  |
|                 | <i>KLRD1</i>   | <i>NKG7</i>   | <i>Gzma</i>   |
|                 | <i>NKG7</i>    | <i>KLRB1</i>  | <i>Gzmb</i>   |
|                 | <i>CCL5</i>    | <i>CCL5</i>   | <i>Prf1</i>   |
|                 | <i>KLRK1</i>   | <i>GNLY</i>   |               |
|                 |                | <i>GZMB</i>   |               |
