# Supplementary material for: The genomic organization and expression pattern of the low-affinity Fc gamma receptors (FcγR) in the Göttingen minipig
Source: Springer Nature journal article supplement (doi:10.1007/s00251-018-01099-1), 2018-12-18
Supplement: 251_2018_1099_MOESM3_ESM.pdf [file 251_2018_1099_MOESM3_ESM.pdf]

>mpig\_FCGR\_locus

CCTTGAGTTAAGAAGAAAATAAAACGAAAGTTGTAGATCATTTAGGGACA  
AATAGCAATGACAAAAATACTTATCAAAATTGAATGGATGTGGACAAAA  
TAGCAATAAGAGGGAAAGTTATAGCCTTTGTAAATTTGTTTAAAAACAGA  
AGCATAAGAATAAATGAATAATACAGTAAATCTAAATAAAGTACAATAAA  
GAAATAATACATTAGAGGAGTTCCCGTTCGTGGCACAGTGGTTAACGAATC  
CAACTAGGAACCATGCGGTTGCAGGTTTCGATCCCTGGCCTTGCTCAGTGG  
GTTAAGGATCCGGCGTTGCCGTGAGCTGTGGTGTAGGTCGCAGACGAGGC  
TCGGATCCAGCATTGCTGTGGCTCTGGCGTAGGCCGGCGGCTGCAGCTCT  
GATTGGACCCCTTAGCCTGGGAACCTCCATATGCCGACAGGAGCAGCCAAG  
AAATGGCAAAAAAAAAAAGACCAAAAAAAAAAAAAAAAAATAATAATAATA  
TTAGAAAAATAAACATGTCTTGGTTTCATTAAGTCAAAAGTTGTGACCAAAA  
AAAAAAAAAAAAAAAAACCCACAGACAAAACCTTTGGCAAGTCCCTAAGATAA  
ACATATATAATAGTCAAGATGGTTTTACTTTCCAAAAGTAACTCCACCTCA  
AAATGATTAAGCTAAAGTAAAGTTATTCCCTTTCTAGTGATTGATTTAGG  
AATGGGCATGTGACCTAGTCTTGACCAATATGATGGGACAGGAATACTTC  
TGGAGAAAGTTTTCTCATTCTTAAGAGAGAGAGAGAGACACACATAGA  
AGAAGTAGTTAGTCCCCTTCTCTATATCTTTGGGAGTGATGCCTAGAAAT  
GCTATAATCATCATGCAGCCAGGCTAAGGGCAACACTCAGAGGATTACAG  
AAAAGTGGATCCAGAGTCCCTGATGTACTGGAGACATCCTGTCTCTGAACT  
TTTTTGTTATAGGAGATAATGGATTTCCCTTATTGTTTAAAGCCAATTCAAAT  
CAGGTTTTCCCGTTATTTCTATCTGAAGTCATTCTGATAAAAAGAAAGCAAG  
CCTGCATATGGGGGCAAGAGAAAAGTATAGATATATAAATTTATGACAAAA  
AAAAATAGAAGAAAATACAATGTATATAGCTGCATAGCCGTAAAAATGGAT  
AATTTTCTAGGAAAGTAACATGTTTTTCAAAACTAATTCCAAAGATATAG  
AAAAACCTGATCAATAATGACAGGAAAAAAATTTGTCAAAAATCTATAGT  
AAAAAAGCTTTCAAGCCCATGTGACACTATAGGAGAATCTATCAAATCT  
AAATTAATTAAGAAGAAGACTGAAGGATCCTAAAAACTATTAGAAACAGGG  
CAGATATAGGATATAGGAAGCTGGTCTCATCTGGGCAATGTCATTGAGA  
TGAACGAACTTCGCTTGTTCAGTCGTAGTGTTCCTGCTCAAGATTTAA  
ATTCCAGGGAAATGCTGTTGATTGGCCCAGTTTGAAGTGCATGTTCTCAT  
CTAGAATCAAGAGATGAAGTCAACCTACCTACTCACTCGGACTGAAAGGG  
GAAGTAGAGCTATTTAGTCAAAGAGAAAAACAGGTTCTGATACTAGAATGA  
GGGGAAATTCATGCTGGGTAGGGAAATAATCCATTATAATCAGGTTGGAA  
AAAATTTTAAATAGTCAACACTGAGAAGGGGGTCAAGAAATGGATACCCT  
AATATACTCTGGGAGGACATGCAATCATTTTTTTTAAGAGCTGCACCTGC  
AGCCTATGGAAGCCTCTGGGCTAGAGGTCAAATTGAAGCTATAGCTGAGA  
CCTATGCACAGTCATGGCAACACCAGATCTGAGCCACATCTTCGGACTAC  
ACTGCAGCTTGTTGCAATGCAGGATCCTTAACCCACTGATTAAGGCCAG  
GATCTAATCCATATCCTACAGACACTATGTAGGATTCTTACCCTGCTGAG  
CCTCAATGGGAATTCCTATAGGTGATCTTAATTATATCTTTTTTCAGATTA  
TTGATCTGATCAGGTTTTTCTATATCTTTTCTTTCTTTTTTGCTTATCTG  
TTTTTTTTAAATTCGTGGAATAAAATAATTTACATCTAAATAAAACAGTTG  
CTACTGTGTAATTTATAAAGGGATTTGTTACTATAAAAAATGGGCATGAGT  
ATGTGAATAAGAAAATCACAAAAGAAGAACCATGAATGACTAGCACTTTT  
TTTTTTTGGCTGCCCTGGTGGCATGCAGAAGTTCTTGGGCCAGGGATTGA  
AACTGTGCCACAGCAGGCACAACCTCCAATCCTTAACCCACTGAGCCACC  
AGAGTACTCTAATTCTAAAGCACATAGTTTTGACATAAAGTAAAGCCCTCAA  
TAACCCAGTAATTGCAATTAATTTCCCTATTTTTTATAACAATATGTGGG  
TATGAAATCTGATATGTGAATATTATAGAAAAGCTATAGAAAACACCCAAC  
AAAGGAAGCTGCTAAATCCTTAATGCAAAAGTGTGCACAATGAAGCTGT  
GTCAGAGTCCCAGGAAAATGAGGCTTCTCCAAGGGCACCCACCAAACCTCC  
CAAGGGAGCTATTAGTCATATTTCTAACCTGCTGGGATGGCTTCGTTGAG  
AAGGTCACATCTTTCTGGTAACTAATAGAAGGGCAGGGCAGGAAGAGTCA  
GCAGTCTCCACTGGGGACTCATCTGAAGCTTGGCTTCTGAAAACCTGGTG  
TTGCAAAGTGATTGTTTATTTGCCACGGAAGGAAGAGGAGACAAAAT  
TCACTGAGAGAAGGGTATTTGGTTTTAAGAAGAGGGGACACTTGTCTTACA  
TTCTAAATCTTTCTTTTCTTACCTCCTACCCATTACTACCTTCCCAAG  
ATTCTTTTATCTTTTCTTTTCTTTTTTTTTTCCCATCTTTTGTCTTTTTA  
GGGCTGCACCTGTGGCATATGGAAGTTCCCTGGGCTAGAGGTCTAACTGGA  
GCTGCAGCTGCTGACCTATGCCACAGTCTCAGCAACAGGAGGTTGGGGGT

GGGGGAAGATGGAACCATATCTGCGACCTACACTGCAACTTGCAGCAACA  
CTGGGTCCGTAACCCACTGAGCAAGGCCAGGAATTTAACCCCTCATCCTCA  
TGGATTCTAGTTGGGTTCTTAACCCACTGAGCCCCAATGGGAATTCCTCA  
AGATTCTTACCATTGAAAACAAATGCATCGGATCAGTCTATGTCTCCAAT  
TAATACAGCCTTTAAAAGGTAAAGAGAATGTTGTTTTGTGTAGTATTTTAT  
TATGAAAGTAATATATGATCTACACAGAAAAATAAAGGAAATGAAAAGCG  
CCAATAATTCCATCACCCCTGAAACAATTGCTTTTAATATATTTGGCATATG  
TTAGTCTGTTTCAACATTTCTGAAATCATGTATATTTATATAATTTTTCT  
CATGTCATCTGTAAACATAAGTATTTCCCGTGTGCTACAATCTCTTATTA  
AAAGTAATTTTCACTGGCTGTGTGGAAGTCTAACAGAAGAGTCTTAATGG  
TGAGAAGTCTGAGGCACAGAAAGAAATCAGCAGGTCAGTTATCTGAGAAG  
GTATTGTCTGTGGCTTTTCCAGAAAAGGGAGCTTCAGGATTCATGTAGATAA  
CTCTGGAGGGGTCGTTTTCTTTGCAACTGCGAAATTCCTTCTCTCTCC  
TAAGAGGAATTCAGGGCAGAAAACACCAAAATCCTTATTCTCTTCCCCAAG  
TCCCAGGCAAGATAATGAAATTTAAATGTGGTTCTGGTAATCTGAAGCCT  
CTGCTTCTCTCTTCTGCAGCTTCCGGATGCAAGAGAAGTGAATAGGTGATT  
GTATCCTCAGCCTAGAGAAAAGCAGAAAAGGAGTAAGGGGGATCCATAGAGA  
GGTCACAGGAATGGAGGCAACAAAAGAGGAGGCAGGGAGGGGTAGGAAGG  
AGAAGAAAAAGCAGGAGGCTGGCATGGCTCACCTCAATTTTGGCAGCCTC  
TTCAGCATCAGTGTGATTGGCTGTGGGCAAAAAACAGTGATCAGCCAGG  
GCACTGCTATGGAATAGGGCCTACCCATGCTGCTGCTGAGACCCAAACCA  
GGCTTGAGGCAAGGACCCTGACTCCAACCTCAGGCCTGTAGGCCAAGAGC  
TCCATTTCCCACCCACCCTCAGTATCCTAGACATGGCCTCTCCCACTGGC  
CACACTGATAAAAGGAAGTAGTCACTGGTGTTCATTCTTTTTTTTTCAGAG  
AATCACTGAGTTTTCTCAGAGCAAACCAGGCAGCTTTAGGGATCTGAGA  
TCTTGGGGAAGAGATGGGGGGTGTTCAGTATTAGGGTGAAGTAATCCAGA  
TTTTTTGCCAGCCATAGTTGTGGCCTTTCCATATTAGCCAGATGTAATATA  
TCTTTGTTGGAATTTTGAAGACCCTGATACTCACTGACCTCAAGAAGAAA  
AAAAGCATGAGAATGAGAGTGAGCAAGGGAGGCTGGAAGGAAGGAGAGAA  
GGAAGCAAGCAAGCCAGCCAGCGAATATTCTCCCTGGTTAACACCTAAAG  
CACATCCAAATTTCTCATGTTTTTTGCCAATAAACTCACTTTGCCAGTGC  
AAAAAGCAGCCTCAGTATCTGCAAAGCAGCATTCTTAAGAAGTGGGGAA  
GGAGTCTGAGACAATGCATCTAGTGTCTTCATTCATCTCCAGGACATAAG  
GAGTTTCTGTGTCCACGCTCCACATTCTGGAACAAAACCATGCCCTGAAT  
TCTCCTTCTAATGTATCCCTCAACAATCCCAGCAAACCTAGTTGTGCTTTT  
TGAGAGACCATCAATCCCAGTGCCTTCTTGTGAAATAAATGCCTGGTGAA  
ATACATTTATGCCAGGTAGAACCAAACATCAAAGGTGTTAGTCCACTTGT  
GTTTGGATTTGTTTCTACATTGGTTTTGTCTGGTGCAAACCTCAGGTCCA  
CATCCCCACTTGGGCTGGCCAAGGGACATAGGGACTTTGCGCTAAGCGCA  
GCTAGGCAGCTGGGCCATTTTGTCTCAAGCTCTCAAAGCTGTTGGCTCTGT  
TCTGAGTCATACTCCAGCCATCAGAGGTGGCGTCTCAAAGGCTTCTTTT  
TCCTGTCCATTTCTGCTGTCTGGGAGCTTCCAGAGAAAAGCTCCAGGTTTC  
CTTATGCTCTGGCTTTACCTACAGTCAGGAAATTCCTGGAATACTCCTG  
TTCCTTTAACATACTCCAGCTGGGCCAGGAGCTGGATGGTTACTGACCC  
TCAGAATGTCAGACCTGAAAGGACTCAGAGGTCTCCAGGCCAACCTACT  
CATTTGCCCCCGAGAGGTGACTAAACCTCAGGATGAGGAATGACACTAAG  
GATTCATTATACAATGGTGACAGGGCTAGTGCCAGGCCCTGCATGTAATA  
AACCTACACAAGTGGGCATTAGAGCCAAGCTTTGCCACAGAGTAAAGAC  
CACTAATGCACCTAGTACCCAGCACTTTCTTAAGCCAAAAATCTGCCCT  
TAATGTTCCACTAAGAGCTGAGCTCGGTTACCCTTTCCCTGTCACTCCAC  
AGAGGGACACTCTGCTGCAAATCTAGGGTTTATTCTTTTGGCCTCCCTCT  
CCTTTCTCTAGAAATCTTATCCCCTCAATTTCTATTTGCCTCAGTCTTAC  
AATTTCTAACCCCTGTCTGTGCCAGCCCTTCCAAGTTTCCATGGAAAGA  
CCTAAATATCTCTGATGTCTGTCTGGAAATATCCAGCTGGTCTAACCC  
CAGAAACTCGGACAAGGCCCTCCCCTCTCTATCTTGACAGGTGTTTATA  
TCTTCTCCCCATCTCCAGTGAGGTCTCCTTAAGCCCAGGAGTTAGTCTC  
AGAACTGACCAAGAGATTTGAGCCCCTGCCCTCTCCCACTGCCCCCTC  
CCTCTCCTGTGCTCCCAGCAGAACTCACACAAGCCACTTCTGATGCACAA  
GGTGGGGCGTCACTGAGCCCCCAGAGGAGGAGCTGCACTCACCTGGTTCC  
TCAGGGAGGGTATCTCCCTTTTCCCTGTGCTTAGGGGTTCCTGGGAGAGC  
TAGGAGGGGCACATAGGAGGTTAGTAGGATTATGGGATAGGACCTGAGTC

TTCAGGACCACGGACCAGAGATAAGACAAAGTTAGAGCCAACACAGACCC  
TTCTCCCACACAGACATCTCTCCTCCCCATTCCCCAGGGACTGCCTTAGC  
CTGTAGAAGGTCTAGGGAGATATAAGTTGGCTAAGCTAACAGNNNNNNN  
NNNNNNNGCTGGTCTAGGGAGATATAAGTTGGCTAAGCTAACAGTAGGG  
ACTGCTGGAACGATTAGAAAAGCCATTGTTCTGCCTTTTTTTTTCTTTTC  
TTCTTTTTTTTTTTTTTTTTTTTTTTTTTTTTTTTTGTCTTTCTAGGGCTGCACCTGC  
GGCATATAGAGTTTCCCAGGCAAGGGTTTGAATCAGAGCTGTAGCTGCTG  
GCATTGCCCACAGCCACGGCAATGCCAGATCCAAGCCTCACCTGCACACT  
ACACCACAGCTCACAGCAATCCCAAATCCTCACTGAGTGAGGCCAGGGAT  
AGAACCCTGTGTCTCTATGGATGCTAGTCAGATTCATTTCCACTGAGCCAC  
AACAGGAACCTGCTGCTGCCTTTTATTTATTTATTTATTTATTTATTTAT  
TTATTTATTTGGTCTTTTTTACCATTTCTTTGGGCCGCTCCTGCAGCACATGG  
AGGTTCCCAGGCTAGGGGTGCAATCAGAGCTGTAGCTGCCAGCCTACACC  
AGAGCCACAGCAATGCAGGATCCAAGCCGCTCTTTAACCCACTGAGCAA  
GGGCAGGGACCGAACCCGCAACCTCATGGTTCCCTAGTCGGATTCAATTAAC  
CACTGCGCCAAGATGGGAACCTGCTGCTGCCTTTTAAAAATCACCTTTCT  
GAAAATCATAGACTTGGAGAAAAGCCTTGTGGCTACCTGATGGGAGGCGG  
AGGGAGTGGGAGGGATCGGGAGCTTGGGCTTATCAGACACAACCTTAGAAT  
AGATTTACAAGGAGATCCTGCTGAATAGCATTGAGAACCTTTGTCTAGATA  
CTCATGTTGCAACAGATCAAAGGGTGGGGAAAAAATGTAATTGTAATGTA  
TACATGTAAGGATAACTTAATCCCCTTGCTGTACAGTGGGAAAAATAAAAA  
AAATAAATTAATTTAAAAAATTAAAAAAATAAAAAATCACCTTTCTCC  
CTCTCAGTATCTCTCCCTGTTTCTCTACATGTATTTATTATCAGTAACTG  
AGGTCTTGGCTATGAACCATTTGCAAAGTGGTTTGTGGTTTGTCTGTGTGC  
TAGGTAAGTATAAGAGCTTACAGATTCGTTTATACTCAACCCTATGATG  
TGGGTTCTATTTGTGTCTCATTAATCAGATGAAGAAATGAGGCACAGAG  
AAGTTGAATGTGATGAGAAAAACTTTTGCCTTCTGAAAAAACAACCTT  
TGTTTTCTGGGTTTGGCTGCCTTAGGCATTTTACAGTGTGATAACCCTGCT  
CACACCCAGAGATTTGGACATTTAAGATAAGGACCTGAGGAGTTCCCGTCT  
TGGTGCAGCAGGGGCGGATCTGACTAGGAACCATGAGGTTGCAGGTTTGA  
TCCCTGGGTTAGGGATCTAGCGTTGCCGTGGGCTGTGGTGTAGGTGGCAG  
ACGAGGCTCAGATCTGGCGTTGCTGTGGCTCTGGTGTAGGCCAGCAGCTA  
TAGCTCCGATTAGACCCTTAACCTGGCAATCTCTATGTGCCACGGGTGCA  
GCCCTAAAAAAGATAAAGAACCTGAGTTTAGGATTTCC  
ACCATAAGTTCTCACTCCGCTTCTCCTGGGGGCACCTTTTAAAAATAATGC  
CTTTAGAGTTAAGCCCACAAAAAGTTAATGTCTCCACCCAATCGCCTT  
ATAAGAAATAGTTGCTTGTCTGCTGGCTCTTCCCTGCTCACCCATG  
ACCTGGGACAGAGGACTGCCACCCCAACCTCCTCATTTTTTGGGATCTG  
TAAGTAACAAATCTTGTGACACTACTTCCCTTTGTATGAGGGTATTGAAAT  
TGTGCCTTCAATCAAAATGACCCCAGGGTTTTCACTTCCCCAATCTGGGG  
ACTCAGCTGCTAAGGGAGTTGCTGACCCCATTTGGGTGATTTATGCCTCC  
TCGTTTATCACATCGCAAATGCATGTTCTTAATTCACCAGCTCCATCTT  
GTCAACACATTGAGTAACTACCCAAGGTTATTAGTTGATGACCTGAGG  
AGCTGAGATTTGAACTCAGGTAGTCTGCCGACCAGGTTGCTTCATCACT  
ACACATCATTGCCTCCCTATGAAGCCTTCTCTAACTGCTCCAGTCCATTT  
TGGGTTATGCAGGCTTCTGTACCCAGTCATACTTTTGCCTTCCCTAA  
CACTGGTCTTATCCCCTCTTATTATCATGATCTATTTGTACTTCAGCCTT  
CTGCACAAAATTATGAACTCCCTGAGGGCAGAGACAGAACTTCTTTATCT  
TGGCATCATCCACAGAGTCTATTGCAGTCTTGTACATAAGCAAGTTTG  
TTCTGGCCTTCTCAAATGAAAGGTTGAATGAATAAAATATGGGACTATAT  
CTGAGTGCTAAGGATTCTCTAGCACAAAGACAGCAGTTCTAGCAATGTGT  
GGGGTTAGGGCCTTGGCTAAGTAGGACCTGATAATGAGGGACCAAGAGGA  
GCCACAAACCTGAAATCCGCTTTCGCTGAGGCGGAACCAGGCTGCTATG  
GCAGCAGCAATAGCCATTGCAACAATCCAAGCAACCACAGCCACAACCTAT  
CGTCACCAGCAAGTTGTTCAAGCTGGACCCTGGGAAGACAGAACTCAGGA  
CAGGCTGTACTCACCTGCCCCACCTCAACCTCCCTGCCCTCCTCCAATG  
CTATACTTGGAGCTGTTTTCTCTTTGGGTCACTCACAGGTACTGGACTCA  
CTTTCTCCCCAACCTCACCTGCACCCGATTTCTGTGACTGGCCTTCTTC  
CTCCCCATCCTCAGCTTTCTCTGTCTAATCAAATGAAGGTACACTGTGTAA  
GGCAGAGGGAAAGTACTCCTCTTAGCCCTCGGGAATAGAACGGAAGGTGGA  
CCTGAAGCCTCTGCCACTGTATCCAGCACAGCCTTAAACTGTCAGGGACA

TGCCATGCCTTTTCAGAGCGGAATGGACATAGCATGAGACATAAGAGGAAA  
TTAGGAAAACCTCAGCTCTTAGGAATGTCCAAGAGCTCAGGGAACCTCTG  
CACCAATGAGAGAGCTCTGTTCTGCTGCTGTGCATATTATGATGGGGCCT  
ATATTTCAACAACCTTGTACCTATCACCTGGAAGCTAAGGACTCTGAGC  
TTTAGCCACTACTTAGTAGGCCACCCATATCCCTGCCCTCTGCCCCAGTGC  
CCAGGTTTGTGTTACGGCATTCTCAGATCTCCATGTAGGTCCGTATGG  
CCTTATCCTTAAATGTCCATCCCTTCTACTCTCCTCCTTCATCTTGACA  
GAGTTCCCACCTTGGACAGTGATGTTACAGACTGTGATGAGTACGACAT  
CTTCCCATAAATCCTGTGCAGTGGTACTCGCCACTATGACTCTGGTFTTG  
CTTGTGGGATGGAGAAGTTGGAATCCACATAGGAAAACCTCTTAGATTTT  
CCATTCTGGAAAATGCAACCTTATGCAGAGGCTGTTTCTCCAGCTATG  
GCACCTCAGCAAGATGGGCTCCCTTCTGGAAAACCAGACTAGAGGTTT  
GGAGCAGCAGCCAGTCTGAAAAGACACAAAAGAGACCACAGGATCCGGGAGG  
TCTGACTCAATACTGAGACCCAGACCATCCTTACTGGTGGGATGTTAGGT  
GTGGAGGGGAAAGCTTAAGTTTGGAAATCAGATTGCCCTGGTTCCTAATTC  
TGGCCCCATCATTTATGAGCTCTGTAATTGTGAGCAAGTAATGTTAACTC  
TTCCAGGCCTCAGTTTCTCTTATGTGAAAATGGTGACAATCACATCATT  
ACCTCTCTAGAATTTGCAGGTGCTCAGGATATGCTTGTCTCAGGTTCCCT  
GTCCTGGAAGAAGCCAGCTGCAGCCCTGTCACGCCTGACAGGGCTCTGTA  
GGAAAGATGCAGGAGACTCTGGGGTACAATCCCTTCTCTGAAGTGGGGGG  
GGGGTCCAGTCTGTCTATGGGAGATAGCAGGTGAGGGGGATACAGCAGAGA  
TATATGTCTTTGGGGAAAAGTCATGAACATCCAACAAAATATTAATTTGGTG  
CATATTAGTAAATGTGGAATTTCAATTTCAATAGGGTCTTTGTCTAAAGGC  
AGCCATGTCATGGGTGGGCCATTAGCTTTCTGTGTAATTTCTTCCCCTCA  
ACTTTCATCCGTTCACTGAGGAAAACATATATTCAATTTCTTATTCCTCT  
TCCCCTTCTTCATCATCATCATCTTCTTCTTCAGGCTGTGCCACAG  
CATGCTGAAGTTCCTGGGCCAAGGATCAAACCTCACACCACAGCAGTGACC  
TGAGCCACAGTAGGGGAGCCAGATTCTTACCCACTAGGCTATGAGGG  
AACGCCTATATTTAATTTTTTTTTGTTGTATAGGGTATAGAGGCTAAGGTGG  
GTACTTGTAAATCCTGACCTCAGCCCACAYACTCCTTTTTTCTAAAGCTAT  
AGGACTGAGCAGAGTTAGAATTGGAAGGAAAAGTGAAGAAAACAATGGATA  
CATGGAAGAGAACCAGGAGATGAGATAAAAAATGACAAAAGCCACATGTGT  
GCCAGCCACATGTGTTTGGCTACAAAACATACTAGGTCCCTGAAGCAAATC  
AGAACAATGCCAACAAAAGTCTCTACACAGATGAGGGAATAAGTGACAAC  
AAAGAGAAAGCTCTGGGCCACAGCTACAGTGGGACAATCCAGAGGAAAAGC  
TGGGGGACACCAGATCTTGCTACTTGTGTACAGSAGCTAGAAAACCCCA  
CTTCTCCCCTGGGAAGGAACCCCTCTGTCCCAGCCATTTCTTCCCTAW  
CATCCTGTGWATTCTTTCTCTTGGAAAACCTCAGACCCTTGACAGGACATGC  
CACACCAGGATTAGGTGAGCAGTCTGGTTCCTTAGAATGCCCTCTTAT  
AAAGCTTGAGTTAGGGTAGAGGTAGGGAAAGGCTAAGAATTGTAAAAAAA  
AAAAAAATTTAATGAAGTGAACCCAGAGAAAATGTCAAAGCTGCTTGCA  
TGTAGCACCAGCAACCAATTCCTTGCACTTCCCCTCCCTGCTTGGCTAAAA  
TCCCCTCTACAGAAGGTGCACCTCATTAGAACAGCATGTTCTCCCTAGCA  
GTCTCAACTGGTATGAGCTTATAACCTGGACAGTGGGGAGTGTCTGCCTA  
AGGCTGGTTTGTTCGAAGAGGGCCAACTTACGCCTCCTTGAGGACAATTC  
TTGGTGCATGCTTTGAGGGCAGGGCCAGTTTCATGTCCATGGTACTCAT  
GAGATGTTCTTTAAGAAAATAAAAAGGGCTTTTGCATCAATYTCYTGGGAAG  
AGAACTCCTCTGCAATCTTCTGGAAGTCTTGAAGAGAGGCGATAAACTCA  
TACAATCTTCTACACTCCACTGGCTAAGTTACTGGACAAGAACACAGGGT  
TGATGCTGTGAATCCTGGGGTAGGCAGAACTGTGTCAAAGTTCCTGGGT  
CACACTCCCCCTGACCAGCTCTCACTTATAAAGACCCAGGGACATTTGGAG  
AGAGTGCTTCATCCTAAGTGAATTTCTCTGAACCCTCGCTAGAGTCCTCT  
TACCTTCRAGCCACTTGCCTGGATCTTAGCATGGGTRATGTCAGAGGA  
GCTGCAGTAGGGTCCACACTGGTGAACACAAGCATTATGGACTTCTCAAG  
ACACTTCCATGTGTTTTCTCTTTCAGGCAGAACTGAGGCTACAGCTCACA  
CTATACTTTTTTTTTTTTTTTTTTTTTCTTTTTTCATTTTTTGGCACCCCGT  
GGCATATGGAGTTCCCGGGCCAGGGATCAGATCCGAGTCTCATTTGTGAC  
CCAAGCCGAGCTCTGGCAATGCTGGATCCTAAAACCCCTGTGCTGGGCC  
GGGGATCAACCTGCTTCCCAGGGCTCAAAGACAGGGCCAGTCAAGCTCC  
TATACTCTACCTCTTAGTGCAACTCATGGAGTAGAAAACCTTTGGAGCCAC  
AGAACTGTTCTGCAGGAGTGCACKTGCCACAAGGCTGGAACCTCAGGAGA

TTTGTCTCTTGACTACTCAGCAGRTGGGCTGTCCCCTCCCAGGGGCCA  
CCTGACTGATTCTCATTACAGCCTTGTCTGGGAGGCCAGTCTACACAGAGCA  
GCTTCTCAGACTTTTGGAGTAACAAACAACCCACTGGGAAAGGTTCTGCTC  
CATCCTGGATTCCAAAGCCCTCGATCATGTGGCTGAGCATGTGGGGCTTC  
ACCATGGAGGTTTGGAGTACCCATTTGTCTGGACACCATGGCTAGTGTAG  
GAGGTGGTGTCTGGGGCAGGGGCCATGGCTGCCAGTTCCCCCYTTGGTGA  
ATTAGYATTCCCTCTGGTCACTGGTTCAGCTTCTTCTCCAAACTGCTCTC  
CTTCTCCTYGGTGGCCTTGGAGCTCACTGCTAGTGCAGAACCCCTTGGCAG  
GAACCCTGAACCCAAGGTGAAGACATCATCTCCTTCCTCCTTGCATTTGA  
CAGCCAATGTCTGGGTTTGCACAGCAGGTACACAGACTGCATGTAGAAGA  
CAACAGGGACCCAGACCTGTTGGCTGAGGGGCAGTGAAGTCTGTGGCTGC  
TGCTGTCTGTCTGCTGCTACTGCTGCACCCACTGGAGGTGCTGTGGGGA  
GAAGTACCGGGATTGACAGTGTGGAGCTGTCACCAGMGGTCGATAGCAA  
TCTGCTGCCTGGTCACTACCTGTTTCTCCAAGAGCTGGATCCGTTGCTAT  
TGCTAAATTGGTGAATGGGGCTGGATCTGTGTGTGGGTGACTGAGCTAGT  
AAGGGTCTGCCTGGGGCAGGTGTAGCTCTCTATGTCAGGTTTCATGCCCA  
CATCCTGTGACCACTCCCATCTGCTTCTGTCTTCTTGGCCACTGCACTT  
TCTGCCTCTGTCCAGCYRCCCTGGATCACCATCAGTGTGAAATGCAGG  
CAAGGGCTCCACCACATCCGCTTTTCTGGGACAGCTYCCACCACCACC  
ATTCCAGAGGAGGAAGTCAAGGCCATTTCTACCTGGACMCATGGA  
CCTCAGAATGCTATTTCCACTGCCTCCACCAAATGTRACTAATGCTAAAGA  
CTGGCATGATCCCTATAKAGGAAACCTGAGCCACAGCCAGATGTCTGGGG  
AGGCTATAGACAGGGGAGGCTCAACGGGAGAACAGTCTTCTGGTTGGAGA  
CTTGGGTTGAGGCCTGTTGGTTCCTCACTGCCAGTGTCTCCTGATCT  
GCATCTACACGGACTCCAGGAGCCTGAGCASCTGGCACCTCCAGCCGGAC  
TACAGTCACTGTCTAATAGGCATCAGGATGAGTTGAGAAGCTAAAGGCA  
CATTCCAGCCCATTGGTCTGGTTTACTTGGAAAAGGTTCCCAGCTGTAGT  
CTTAGGTACACTCTGGCCCTGGAACAGGTTGAGGGGAGGAGGAGGTGGTGT  
TTCCAGGAGCAGAGCTTGGGTCAAAGTGGTAACATWGGGAGAGTTACA  
CTCGAGGAYTGGCTGGTCAAGTGGGTGGCTGATGTTGTGGCCAGATTGAC  
TGAGGCCTGGGTGTCTGGTCACTGCTGTGTAGTGTGGTGTGTTGGGGAGC  
TGGCCTGTGACTAGCAGCACTTGTGATCAGCTGCACAGAGGCCAGGCTA  
TGCAGCTGGGTCCGCTGAGCAGCAGGTGCACATGAACTGGTAGAAAAGCG  
GGGGCCCATAGAGCTATCACAGCAATGCCTGCAGAGCCTGTTCTGCTTGC  
TGTTTCATACAGTGGCTTTGACTATTGGGGGCCGAGGGCTACCACCTGAGT  
TGGGACTCTCATTGGTGAACCTGGCATTCTGTTGGCTCTAATCTCCACTA  
GTGACCCAGGGTCCCCAGGCTATTGCTCTGGCTCAAGACTTTCACATCG  
AGCTCTGCACTCAGATCTTCCAGGGCAGTGTTCAACTCACATGCTGGGGT  
CCCCTATTGCCAGGCAAGGTGGCTGGGGGTAGGGGTGATCATAACAGTCAT  
GAGGGGTGGAATTCCTCATCTCCACCCATTCTGGAGGGTTCGGGGCAC  
TGAGGTGAGGGCTCTGCCAGGCCTCTGGGGATTCCCTCCAGGACCATCTT  
TCCCTGCTAAGCCCAGAGGGGAAAGATGATAGGTCTGGGGCMGAGGCCCA  
TTTGGCCTATTAGCTATCTTTGAGGAAAATTTAGGAGCCAGGTAAGAGAA  
GGGGACAAAGTGAAGTRTAACAATGACAATATTCATCATAATTGCATTAY  
GCCTTTTCTTTATGGAGAACCTACTTCTTGCCAAGATCTTTGGAGAATCT  
TTTTTTTTTTTTTTTTTGTCTTTTTTGCCATTTCTTGGGCCGCTTCTCTGCG  
GCATATGGGGATTCCCAGGCTAGGGGTGAATTGGAGCTGTAGCCGCCGG  
CCTACACCACAGCCACAGCAACCGGGATCCGAGCCGCTCTGCAACCTA  
CACCACAGCTCACGGGCAACGCTGGATCCTTAACCCACTGAGCAAGGCCA  
GGGATCGAACCTGCAACCTCATGGTTCCTAGTCAGATTTCGTTAACCACTG  
AGCCACGATGGGAACTCCAAGGKCTTTGGAGAATCATTGATCTGTTTCAG  
CAAACAGTCATTGAGCCCTGCCCTGTGCCTGAGGCTGGAAATACAAATAA  
GATTAACACACCACTTTCACCTCAAGTTGCACAGAGAGCCRGGGTGGGG  
GTGKGGCAGGGAAATGCTGATTCTCACCAGACCTGATAGAGGAGGCAGT  
AGTCTCTCCATTGAGCAGATGAAGAACTGTGGCTCAAAGCTAAATGGAA  
TCATCATGTTTACAYGGCTAGTAAGTTCCAGGGCTAGGATTCAGTTGTGG  
TCTGTCTGTGCATTTGACTCTGCTGTAAAAATGGAAGCGGTCCATGAGT  
TAGGGATTTCCCTTCTGCCTCTCTCACACTCAGCTGCCTGTTTATGGCCTT  
CTTACCTTCTTGTTCAGTCAAGTCAAGTCAAGTCAAGTCAAGTCAAGTCAAG  
GAAATCTCTTAGGCAGTTCACCCCTACCRACATACTAAACCAAGGTGGW  
GGGTGGGAAGGGAAATGAGTGGGCAAAAATGACTTCAGATTCATAGCCAT

GCTTCTCAGTAAACAGGCCACCCTCTTCCCTAAAAACCTCTGCCCTGTAA  
GCTGATTTTCATCTCTCCTTGTCTCCCAKACTCTCCAGGCCTTCTTCCA  
CTAACAGAAATCACATCCAGATGCACAGGGTCGCTGAGACTGGAGTAGG  
CAGTCTGGCACCTGTAGTATCCGCTGCTAGCTCTCCTGGCCTTAAAGCTG  
AAGCTGGGCTGGTTCTCGGTCCAGGTGAAGTTCCCATATATGGAACCACTG  
GGTGGTGGTGTTCACAGGGTCATGGTTCGCCCTGGCACGTCAGTGTACAG  
AATCCTCCTGGAGCACATTGATCCATGCAGGCTGAAGCTTCACTCAGCC  
TTTGGGAGAACTGCTAAGGGGCAGAGAGAAGAGGCAGCATGAGGAAAGGG  
GTCCCTAGGGCCCAAGTAGACCCCAAATGTTGGATAATGGGAAACTGTG  
GCCCTGTGGAGACATCAGGAGAGGAACCAACCAGAACTGTTGTGCAAC  
TGAAGGCAATYCCTCCAACCTCATATAGCCCAACAGGGGCCCAAGAAGC  
CAAGTTCTCCAGGGAGCTTGTCTGCTCCTCAGGCAGAWTAAGAAGGAAG  
GGAATAGGAGAGGGGCAAGGCAGACACATTACAAATACAAGTACACCTGA  
CCAAAGGATGTCTAACCAGTTTCTTCTTCTCTCCATCTCTCTGTCTCAT  
CTCTCTCTCTGTTCCTCTCTTTCTCTCTCACACACATGCACTAYACAT  
ACATCTTTTTGGGGAATCAATTTCTCTCCTATAAAATGAGGTATTTGGAC  
GTTAGTAGATAAATGCTCTCCACAGTTGGATGAAGACAAGTGGGGACATC  
TGGTGGAGATGCCAGGCTGAGAGTCAGATGTCATGTTTCTGTTCTACCCT  
CTTCTACTCCTTTACCTTAGGATAGACCTGTCTGACACCCAAGCACAAA  
AGGGTCTCCGTGGTCTCAGTAGAATGAGAAAGGGGGAGAAAGACTGGAAA  
GCCAGTCCAGGGAAATCCCGACTTCAGTGCCGCAGGGAGAGCCCCATCCC  
CCTAACTAGTCTGGGAAGTAGAGAGTTTAGTGGTGCAGAGAGAGAGGTG  
CTCAGCAGAGTTCACACAACCACACTGCAACCAATGGTATCTCCTCCTGT  
TAATGCCCAGGGATATAGGCCGTAAAGCCCTCAGATATATGAAAAGTACA  
GGATTTATCAAAACATGAGTATAACCTTAGCATGATTTTGYATGCAGCTA  
CAATTAATTTTTTTTTTAAGTCTTTTTGCCTTTTCTAGGGCTGCTCCCGC  
AGCACATGGAGGTTCCAGGCCAGAGGTCGAATCGGAGCTGTAGTCACCG  
GCCTACGGCAGAGCCACAGCCACACAGGATCTGAGCCGCTGTGCAACCT  
GTATCACAGCTCCCTCAACGCCAGATCCTTAACCCACTGAGCAAGGCCA  
GGGATGGAACCCGCAACCTCATGGTTTCTAGTCAGATTTCGTTAACCCTG  
CACCACGACGGGAACTCCAGCTACTACTAAATTTGCCTGGGCTTGTGAAT  
TAGTATGGAGAGAGGAAGGCGATTGAAGTAGAAAAGCAGTTCTTTTTCTGTG  
ACAGTATCTGTGAGGTCTCCTGGTTAACAGAACCAGAAGGCTGAAGCACC  
TGTACACAGTACTGCCCTTCCCCACTTCCCTGGGAGGAAGGAGAAAAGG  
ACAAGGCATCTTGGGGGAGCAATTACTCTTTCCTGGCTCTGCCTAGGTCT  
GGGGTTGCTGCTGCATKAGACAGAGCATCTCCAGACAGGGTGTGGGAA  
CAGAGCAAGGGGGTAGCTGTGGGGAAAGAGGATGTGGGTGGAGCACTTAC  
CAYGTGTCCAGGAACAGGAGCTGTAAGAGAGAAAAGCAAAGATCAGCATG  
GTGTTTTGGATTTGTTGATTCATGGTTATAAATAATCACCTCCTTGCCTTT  
CTCCTTAATTTCTCCTGTCTTCTCTGGCTGCAATTCATTCACCTGTGTTG  
TCTGTACCTTTACTTCTTACAGCTATGTGTTAATGAAAATTTCCACATAGA  
GGCTGGATTCATATCTGTAATTTACTGTCTCCATATTCAAAAGGACACT  
AAACTGCCATTCTGATGCTTTTCTCTAGTAAATTTGCTCTGAGGCTCTTG  
GTAGTGACAATTGGTTTTTCTCATACTCAAACCTTCCCATCTTCTGC  
CTTCAGTCCCCTCTCATTCAAAGCTAATGTCTCCTTTATCCTCACAGAG  
AAAACAAAAGCAGTTAGACAGAAGGTCACGTCCTCCCTAACTAAACC  
CTCTATCCTATTTGTGTCTCTACCCATCTTCTTCTTGGTTTTCACTGG  
GATAATATCTTTCTTCTATCTGTGGTCAGGGTCTATCCTGTGTACCTT  
CCCTTTACCCCTCTCAAGGATTTCCCCCTCTCGGTTATTTCTTTTGCTT  
CTGCCTCACCCATTTCTCCTTCTTAGCTGGATCTTTCCTACCAAAAATAAT  
TATATTCCAGGATCTTTCATTAAGGGAAAAAAAACACACACTTGGTCCC  
ACATACAATTCAAAATTAATTTCTCTGCTCCCTTCCAGCCTGATTTCT  
CAGTTCTTTTTCTACATAGGCTGTCTGATTCCTTCTCCTTCCAATCACT  
CTTTCATTCTCTGCAATTTGAACTCTGCCCTTACCAGTCCACTAAAATTT  
TTCTTGTCAAAATCGCCAATGACTTTTCTGTTGTCAAATCAAGTGGACAT  
AACCTATCACCTCTCCAGGTTCCCCGATAAAAAGTGTATATCTCCACCAT  
CTACCCAGGTAATCATGCCTGAAAACCTGCAAGTATTTTTATTCTCTCTC  
TCTCCAAAACCTTCTGCCTTTGCATCAATAAGTTGTGTTCTGCTTCCA  
ATTAGTTCTTGAATGCATCAACTTCACTCCACATTAATTTTATTTTAT  
TTTATTTTATCCTATTTTAAATGGCCACGCCCACTACATATGGAAGTTCCC  
AGGCCAGGGATCAAATCCAGCTATTCCAATCCTCAACTCACTATGCCAGG

CCTAGATTGAATCCACACTACCACAGAGGTAATGCCAGATCCTTAACCTA  
CCAGATCCTGTACCACAGCAGGAACTGTCATACTGCTTTGTCACCACAAG  
CTTTCTTCCATCTCCTAATTTGTCTTTTCCCTTCTTTTGTTCACCTGCA  
ATTCATTCCCCATGGAGAAGCTAGCAGGTTTTGTTTGTGTTGTTGCTTT  
TTGTCTTTCTAGGGCCAGACTCGCAGCACATGGAGGTTCCCANNNNNNNN  
ATCTAATTGGAGCTGTAGCTACCGGCTACAGCCATAGCCACAGCAATGN  
NNNNNNNNNNNNNNNNNNNNNNNNNNNNNNNNNNNNNNNNNGGCAACACCAG  
ATCCTTAACCCGCTGATGGAGGCCNNNNNNNNNNNNNNNNNNNNNNNNNN  
NNNNNNNNNNNNNTCGTTTCCGCTGTGCCATGAGGGGAACTCCTAGAGTTA  
TTTTTAAAATAACAAATCAGGAGTTCCCATATGCGTNNNNNNNNNNNNNN  
NNNNNCTAGTATCCATGAGGATGTGGGTTTGATCCTTGCCCTGCTCAGT  
GGATAAAGGATCCAGTGTGGCATGAGCTGTGGTATAGGTCACAGACACA  
CCTCAGATTCTGCCTTGTGTGGGCCAGCAGCTGTGGCTCTGATTTGACC  
CCTAGCCCAGGAACTTCCATATGCCATACATGCAGCTGGCCCTAAAAAGA  
AAAAATAANNNNNNNNNNNNNNNNNNNNNATAAAAAATTTTTAAAAATCAGAT  
AATATCATATCCCTGCATACAAGCCTTCAATACTCTTCCTTTGCTTTTAA  
AATAAAATGTAAATATTTACCAGGCCACACCTGATAGGACCCTTGCTCAC  
CTCTCCAGCCTCATCTCGAACCCCACTTTCCCTTCTCATTTAGCCCAAT  
AACACCAGCCCTCTTGAAATTTCTCAAACCTGGGGCTTTTCTGCGTGCTG  
ATCTCTCTACTCCAAACCTCCTTCCCTTTGTATCTTCAAATCACTTAATCC  
TTATCATCTGAGTCACTTCTCAGAAAATTTCTTCCATATCATCCTGTTT  
GTGTAGGCGGTTCTCTCATCTCCTCCACAACAACCTGTTCTTATCAGAATA  
TCCTGTTTACATCTTCGGAGCCATTTTCCAACCTATATTTATATTTATTT  
TTGTGTTGCTTATATCCCTCAGTAGAAGGTAAGCTCAAAGAGGGCAATAG  
CCGTGTTAATTTTATTTGCCAGCGCTCTGGAAATCATTCATTTGAGTCCAT  
CCAGGTGGGAGATAGGAGAGCCCAAAGTTGTATTGATAATAGAAAAGTGAA  
GACGAGGAGTTCCCTTTGTGGATCAGAGAGTAACGAACCTGACTAGGATC  
CACGAGAATGTAGATTCGATCCCTGACCTCACTCAGTGGGTTAAGGATCT  
GGCATTGCTGTGAGCTGTGGTGTAGGTGCGAAGACGTGGCTCGGATCCAC  
GTTGCTGTGGCTGTGGCTGTGGTCGGCAGTTGTAGCTCCAATTCGACCCC  
TATCCTGAGAACCTCCATATGCTGCGAGTGTGGCCCTAAAAAGCAAAAA  
AAAAAGAGAGAGAGAGAGAGAAGAAAAAAGAAAAGAAAGTGAAGATGAGAT  
AATGGAAAAAATAAAAATCATTTNNAAAAAGTAAAAATGNNNNNNNNNNN  
NNNNNNNNNNNNNNNNNNNNNNNNNNNNNNNNNNNNNNNNNNNNNNNNNN  
NNNNNNNNNNNNNNNNNNNNNNNNNNNNNNNNNNNNNNNNNNNNNNNNNN  
NNNNNNNNNNNNNNNNNNNNNNNNNNNNNNNNNNNNNNNNNNNNNNNNNN  
NNNNNNNNNNNNNNNNNNNNNNNNNNNNNNNNNNNNNNNNNNNNNNNNNN  
NNNNNNNNNNNNNNNNNNNNNNNNNNNNNNNNNNNNNNNNNNNNNNNNNN  
NNNNNNNNNNNNNNNNNNNNNNNNNNNNNNNNNNNNNNNNNNNNNNNAA  
AAAAAAGTGAAATGACATGGCATGAGAGAAAATTTAAGAGGCAGAGAGA  
ATGTGGCACTTGATGAGATGTGGGGATGATATAAACAGCTGACTAGGAAA  
AAGGTTGATTGTGGTCACACAAATGTAAATGTAGGAAGGACAAGAACATT  
TTCGAGGGAAAGATGACAGTTAGATTATAAATACATTTGTGTTCTTGAGGC  
GACAAAGCAATTCGGAAGTTTCCAACCAACAGGTAGAAATATGAAATTTGT  
ACTTGACACAAATAAGAAAGATGGGTTTGGAAATTACTGACATAGAAGTC  
ATAGCTAAAAACCAGAATGTGTAGGATTGACAGCATGACAGTGCGGGGAA  
CGGGTAAAGTAGAGACCAAGAGGAGAAGGAAGAAAATAGTTAAGAGTCCA  
GAAAAGTAAAGTCAACTTCCATTCATTCTTCCACATTCAGAAAATATTT  
ATGAATATTAACAGCTTTACACTCAGTGTACTCACTGTGAGGGAGACAA  
AGACCGTGTGCTCTAGGTTAGGAAGGCTGTCTCTCTCTGTTTACAGATAAA  
TCCCCAAGTCTAGAACTGAGCCTGCACATGGCATTATTTGATGTTTGA  
ACAAGGAAGTTTGTGGAATCTTTGAAAAGCAGAGAGTTCAGAGTATATAC  
TGCCTGGCTCTAAAGGAAATCCACTCGGAAGAGTAGAATTTGGAGCTTTAT  
TAAGCACTGGAGACACTGAAGGTATGTATGGAGGGCAGGGACTCCTCCAG  
AGCTGTAGTTGAGGAAGTCATGACTTCAGGGTGCAGCATGGATTCAGGCA  
AAAGGACACTAGGAGCAATCAAGAGTGGATCAGGAGGGAGTTCCCATTTGT  
GGCACAGTGGTTAATGAATCTGACTAGGAACCATGAGGTTGCAGGTTTGA  
TCCCTGGCCTTGCTCAGTGGGTTAAGGATCTGGCATTGCCGTGAGTTGTG  
GTGTAGGTTGCAGACGCAGCTCAGATCCCATGTTGCTGTGGCTCTGGCAC  
AGGCCNNNNNNNNCAGCTCTGATTCGACCCCTAGCCTGGGAACCTCCATA  
TGCTGCAGGAGCAGCCCTAGAAAAGGCAAAAAGACTGAAAAAAAAAAAAA  
AAAAAAGAGTGGATCAGGAGGTAATGAAAATTTGAGTTACTGAGCAATG

AAGACCAAAACAAGGCGAGGTGCGGCAGATAAGGATCAAAAAGATGGAGT  
AAATCCTTGCTGACTTAGCAAAATGGCAAATGGAGGAAAATACCAAAGCC  
TCTCCCAGGAGTCTTGTCTAGGCATCACACTGGTATCACCCAGGCAGAGG  
TAGGGAAGCATAACCACCTCTCCAAGCCTGAGCTTCTTAAAAAGCCTTTC  
TGGCTTTTCTCCTTGATCAGTGACAGGACCTATCCCCATATCTGGGCAGTA  
CAAGGAACATGCCTGCTTCTCTGGTCCCACAGGTGATGATCCCAGAATTG  
CCTGGTGTATTCTTGAGCCCCATTCCMTGGATAACCRAGACYCTCTTA  
TGCTTTTTTCCCAGGGGAATCTCCTTTCACTTCCGCTGCTTGAAGTGGTKT  
CAGGGGCACAGAGAATGGCCACTGCACCCACCACAGTGTCTTATTGCTT  
CCCTCCCCCTCTATCTGTCTTAAAAGATGATTAGCCCTCCAAGATTTGG  
TCCCAGTAAGACATAAATTTCAAAGGAAGGTAAACACCTTGGCCCTCAT  
TAGCCTTTCAAGTCTATGACACTAGACTTTCTCAGAGCTGGCTCTGCTG  
TGCAGGGTGGCAGAGCACCAAGGACATGTGAACCCAGTGAGATTGGGCAA  
AGACTTAAAAGAGATTGGCAAAAAAATTCCTGATTCTGCCAATTTTACA  
ATTTGCCAAAGCCAGCAGGGTGGTCAGAATTTGATTTCCATCAGCCTGCC  
CTCACCTCTGACTTTCTGACGTGCTTCCCATGCCCCCAACTCCTCA  
ACTTTGCCAAGCTCAGCCCCAACCRAGGTGGCAGCAGCTGAGTTAGAAA  
AGCACACCTGCCTCTGCTCCTGCTCCACCGTCCCTCCTGGGGACTCTCAC  
T**ACCCAGGAATAGCAGAGCTGTCCACAGGAGCATGTGGCCAAAGGATG**  
**GCAGGGCATGCAATCAGCCCAGTCACTCCTGGCAGMGGGGAGGGCTAGGA**  
**ACGAGGGGATCCCCAT**CACCTCCTGGAGTACGCAGGTTGCCTCTGGCAGC  
GCCAGCGCAAGACAGGCTTCTCTCAAGGCTCGACAGATTCCACCCAGAG  
GACAGACAAATTTCTGGAGAGCAAAAAGAGGAAGTAAAAAGAAATGTTTTCT  
CATTAGCTCCTCCCCTCCACCTCTTTCATCTCAACTGTCTCCTCCCAGA  
AGATTACAGGGCTTCCCAGAATGGATGTTCCCTCAGTCCCCTCCAAATTC  
CAGAAAATGTAGAAATTTGGGAAACAACCTTCTCTCCTCTGGGGCCTCAGC  
TGGGCTCAGCCTCTGGGAGAAAGAGGGGACTAGTTACYCAAACCTCAGCTC  
ACAACCTCCTGTCTSTCTCTGTCTCTTTAGAAMAGGCGATGGAGGAGAGT  
GASCCCCAGYCTTTCCGTACTTCTAGATTCAATTCAGAGGCCCTAGACACC  
TGCATCAGATTCTTCTGAGGCTGAGCTTGGCGGCTTGAGACCAACCACC  
ATCATCATTTGATTTTTCTTTATTATCATAATCCTGACTCTGTTTTGGATT  
GTGGAACAAGGACAAAGAGGTGTGTGAGTGTGACAGTAGGATGGTCACAC  
TAACCTCTTTATTCCCTTTGTCAATTCATCCTTTTACGCATTCCTCTGAC  
ACATCTCTCTCTCTCTCTCTTTTTTTTTTTTTTTAAGCCGCCCTGCA  
GCAAATGGAAGTTCCCAGGCCAGGGATCGAAATGGAGCTGCAGATGCAAC  
CTATGCCAGAGCCACAGTAACACCAGATCTGAGCTGCCCTGGTAAACTAC  
GCTGCAGCTTGCAGCAATGCCAGATCCTCAACCCACTGAGCAAGGCCAGG  
GATCAAACCTTCATCCTTACAGAGACAACATCAGGTCTCAAACCTACTG  
AGCCACAATCAGAACTCCTAACAGCTATCTTTTGGAGCAACAGTTTGTGCC  
CTGGTTCTTTATCTTTGTGCGCCCTCATTCCCATCACAGTTTTTATCCTTAC  
AGCATAGTGAAAGAGCAGGGCTTTGGAGCTGTACATGTCTTATTTTGGTT  
TTTGGTTTGGGTTTTCTTTTTGCTACAACCATGGCATGCGGAAGTTTCTA  
GGTCAGGTAATAACTCAAACAATAGCAGCAACTCCAGCATGGCAGTCAC  
CTGCCACGGGGGAATCCCTATGTAAGACTAATTTGAATAATATTTCTT  
AGAACTACAGATTCTCATTTGCATAAGTGTAGATTATCATGCCTATCCT  
TCAAGCAGGATTTCTCAGCCTCAGTGTATTGACATTTGGGGCCAGTTAA  
TTCTTGCTGTGAGGACCTGTCTTATACATTGTAGGATGTTTAGCCACATC  
TCTGGCCTCTACCCCTGGATGCCAGGGGCACCACTAGTTGTGAAAATAA  
AAACTTCTAAACATCGGCAAAATATTCTCTTGGGGGCAATACTGCGTCT  
GGTTGAGATCCACTGCACTCAAGATATTTGAAAATTTAAAAAGAACCTGT  
AAGCTAGCAAAGTGCCTTGTATACTGGAGGTATCTAATGAATGCTAGTAA  
CCCTTTTTACTTGCTGTGATCATCCTCATCACCATTTGTTCCCTCTCAAC  
ATCCTCAGAACATGACATGCTCTTTGATGCCTCTTGGTGTCTGTGCTAA  
GGCCTCTCTTCAAATGCTCTCTCTGGAAGCAAGCTGTAATAGTCAAGGA  
AATGGCCTTGTAACCTGCTCTCATATTCTGTGGTCTCAGAAACCTCC  
ATGGCTTACCCCTTGACCAAGGCTTTTATCACTGGCTTCATTCTTCCC  
CATCCTCCTGCCCTAATTTACTTCCAGGGCTTATCTGATTTTTTAGGTGA  
AAAAATTTCTTTATCAGTGACAAGACTCCAACGAAATGACATCAACACT  
TTAGAACTTAATTTATATAATGATACCCACAAAATTTGGAGCCACCTAAGT  
AGACCAGCCCTTACCATAAATTTAAACCTAAGTCAGTCTGCACCTACAGG  
AACTTCTTTTGGAGAACCTAACATACACCAATCACAGTCTTCCAATTCA



GCTTTAGCCAGTTTACCTTACCCTAGAACTACAGCCTGCTAGCCTTTTA  
AGGAAATTCACCTCCTACCCAATCATGTTCTGTTTCCACATTGCTTC  
TTCTAAAGAGCCGTAAGGCTTGGTCTTGCCAGATCCCTTGGGAAGAGTT  
CTCCACTGCTTATGAGGAAGTGTATACACCCAGTCCACAGCTTGTCTTCT  
CTTGAATAAAGGATATCAAATTTGTAAGTGAATTGGTTCAGTTTTTTCAT  
TGAACAGATCAGGCATATCTCATTTTATTGTGCTTGCTTTATTGCGCTTT  
GCAGATAATTGCATTTTTTTTTTACAAATTGAAGGTTTGTGGCAATCCCGG  
CTGAGTCTATCACTATCACTTTTTCCAATGCATTTGGCTCACTTTGTGTC  
TCTGTGTCATATGTTGGCAATTCTCACAATATTTCAAATTTTTCTTCCT  
ATTATATGTGTTACGATGTTTTGTGATCAGTGATCTTTGATGTTACCATG  
GAAATTGGCCCTTTTTAGCTATAATGTCTTCTTAAATGAAGATATATATG  
TTATTTTATAGACATAATGTTATTGCACACTTCTTAGACTATAGTATAGT  
GTAAACATAACTTTTATGTGCACTGGGAAACCAAAATTTGTGTGATTCAT  
TTTTATTGCAATATTCACTTTATTTTCAAGTGGTCTGGAACCAAAACCGAGAT  
CTCCCTGATGATGCCTATAATGTTATGAAGTGTGATATGAAAAACAGCTA  
CTGAAGATTGCAAGGTNNNNNNNTTGGCAAAGGTAAAGATTCCTATGGAA  
CCACTTCAGTTTTCTGCCTCTCTATCTACTCTCCATGATCTCCAATAAAT  
GTCTCTTACATTGAGTTCACCTATTTCCATTTTGTGAGCACAAGTTCATT  
CGTTCTAATCCTTGTAGTTTTGAAAATGGGGGTGCGAAAGGCTCCAGTTTT  
TATTGTTGTTGTTGTTGTTGTTGTTTTAGGGCTGCACCTGCAGCATA  
TGAAATTTCCAGGCTAGGAGCCAATCAGAGCTACATCTGCTGGCCTACA  
TCACGGCCACAGCAACACCAGACCTGAGCCACGTCTGTGACCTATACCAT  
AGCTCATGGAAATGCTGGATCCTTTAACCCTGAGCAAGGCCATGGATC  
AAACCATGTCTCATGAAGGTTAGTCGGGCTTGTGCGCTGAGCCACA  
ATGGAGCAACAATGGGAACCCCGAGATTTTTGACAATGTGGAAAACTGAA  
GTATGACAGACTCCAGATATTTTCGTAGTGAGACGTAGGGGGCCACAACAT  
CTGAGTGGGTGCCAATCTCATCTCCAATGCCAACACCTTCAGAAGGTAT  
TGACAGATCTCTGGAACAGAACCCGGCTAGCCAGAAACAGTAAACCTGGT  
TGAAGTAGAGGAAAATACATAAAACAAGGGAAAATAATAGGTGTCCCTCAA  
TCAAAAGAAAACATGATGTTTTCCATTAGGAACTCACAATGCTTGAGTT  
AAGTCCATGGCATAAACTGCTGGACAGGTTGGAGAAATTAATTAAGACAA  
TAGATTTGGACTATTTTGGCCAAAAGCACATCAAAATATGTGTAGGCACA  
AATCCAATATTGAAAGCCGTGAGTACATCTGCCACTGTAAAAGAAATACT  
CTCATGAAAGGAGTAAAGGTTGCTGTGAATGGGAATCTCTGAAACCAGA  
GCAGCAAAAGTGGTGTGACACAGATCAAGCACTTAAAAATCTCATAAAAAAG  
GGAAAAGGTTGCTGTGAATGGGAAGCTCTCAAACAACAGGAGCAAAAAA  
GGGGAGAACAACAACAAAACCTTAAAAAGCTGTTAGAGCCCTCATCGCCTC  
ACTCTCAGACTCCTGGGCTAGGATAAATTTGGTCAAGGAATGGGTGAGATC  
AACAGCAGGTCACATGATACCCTCAAGAAAATTTCCATGTAACCAGATAC  
ACTGTTACATAACCACATAACCCTCAATCCAGTGGTATATTCCTATTAGGC  
TCTGAGAAATCCAAAGCTTAGCTACAGAAATGGACCCCTCAAATTTCAA  
GAACTAAGCATGCCACCTTCTGGCACACATGCCTATTTTATATCTGAGGA  
ATGCAGTCCAAAAACGATAGATATCTACAAAAACAGCATCATCTTACT  
AAAACAACCTGGAATTACAACGGCCATTATAGGGAATCTTCCAGTTACAC  
AAGATCATCTCTTAAAGAGTGCCTTGTGAGGAGTCCCGCCATGGCTCAGC  
AGAAACAAATCTGACAAGTATCTATATACTCAGACGGAAAGAAAATATTC  
CAAAGACAAACTGCCACACATCTAGAACATAGACTTCTTTTGATTTGTAT  
CTTAAAGATCTTCTCCCTGGTATGAAGAAGCAAATTTGGGAGTTCCCGTGG  
TGGCGCAGTGATAAAGAACCTGACTAGTATCCATGAGGATTTGGGTTTGA  
TCCCTGGCCTCGCTCAGTGGGTTAAGGATCCGGTGTCTCTAAGCTAAG  
GTGTAGGTTGCAGACGCACCTTGGATCTGGTGTGCTGTAGCTGCAGCTA  
CAGCTGCGATTTGACCCCTAGTCTGGAACTTCCATGTGCCACAGGTGCA  
GCCCTAAAAAAGAAAAAACCAAAACAACAAAAAAGCAAATGA  
AGATAATGTAGTTGTGTGGATGGGTCAACCGTTTGTAGGTCATACAGGCTA  
CAATCCAATTCCTTGTAGGAATTAATAACTGTCTTGTATATAGGACCAG  
AAATGCAGTTCTAGAAACAATTCAAATCTCACGTATCCTTTTTTACCAGTT  
CCAAAACCTTCTCATCTCAAAAAGATCATAGGCATTGTAAAAATCT  
GGATTTAGAAAATAAAATTTTTTCTTGGAGGAACTTGCATTGTTTCCCTG  
TGACATTTCTTTGATATTCAAACCTTACATATATATATATTTGTCTTT  
TTAGGGCCCAACCAGGGTATATGGAGTCAAATTTGGAGCTATAGCTGCTGG  
GCTACACCACAGCCACAGCAATGCTGGATCTGGCTGTGTCTGTGACCTGC



CATGGAAGGGACTCTACCAAGAATTCTTGACCACTGACCCCTGTAGGCCA  
ATTACAAGTTATTGAAACTTGCATGTATATTTACAGCTTAAAAAGACTC  
CACCTGACATCTGGTCCTGAACAAACACTCGAAATCAAGCTTACTTGAAT  
GAGAAGCTACTGACATCATGAAGTAGAATGCTTCCACCAGAGAACAAGAA  
TCCCAGTCCCCTCTCTTTCATGAAGCAGCTTCTCCCTTTTGTACCTGCTT  
CATCATTCTTCTTTCTTTCTGTGTCATTTATACAGATAATGCTATTATCT  
ATATTTCTGGGGCCCTTGCAAAGGGGGGAGACCTATTTGATTAGTGGGTTT  
GCCACCAAAGACCCCCACAAGGTCTAGGATGCTGGTGATCCTGCAGTTCT  
GCCTGTTACAACTTCTCCCTGATTTCCAATGCCTCTTCTCTGGACTAA  
ATTAACCCCTCTCTATCTCTGTGTCAGATTCCTAACCTCACCTACAAAT  
CAATTTCTCTGCCTCCAGTTAACAACAATAAGAGAGGGAAATCAGAACAA  
TATTCTCTGTGCAGTCTACAGACCCCTAAATCTTAAATCATAAGTCATCT  
GATTTCCAGAGCTTTAAGCTTTCCAATTTTGAGCCTTGACTTATCACTCT  
GCACTCCCATTCCAATATTCTCCACCACAGATATAACCATCTGTGCTCTTC  
CTGGATTCATCTTTATCTGTGGACAATTAGTGTCCCCTCCAGTATAGGAA  
GCTCAAATTTATTTATTTGTTTTTAAATCTTTTGTCTTTTATAGGCCACA  
CTGCAGCATAGGGAGGTTCCAGGCTAGGGNNNNNTCGGAGCTACAGCT  
GCTGGCCTACACCAGAGCCACAGCAATGCCAGATCCAAGGCGCATCTGTG  
ACCTACACCACAGCTCATGGCAGCACCAGATCCTTAACCCACTGAGCGGG  
GCCAGGAATCGAACCCGCAACCTCATGGTTCCTAGTCAGATTCATTTCTG  
CTGTGCCATGATGGGAGCTTGGGGTTAATAGATGCAGACTATGCTGCT  
GTGTAGTACTAGGAAGTGTGTCTAGTCACTTATGATGGAGCATGATAATG  
TGAGAAAAAAGAATGTATACATGTATGTGTAAGTGGGCCACCATGTTGTA  
CAGTAGAAAAAATAATGTATTGGGGAAATTAAAAAAAGCCAAACGTA  
CTGGACTAGATCAACCAGGTATGTACAAACGCCTTAAAAACAGTGCTGGT  
ACATTAAGTTATCAATTAATAAAAAAAAAAAAAAAAAAAGGGAGT  
TCCCATCGTGGCTCAGCAGAAATGAATCCAAGTAGGAACCATGAGGTTGT  
AGGTCCGATCCTTGGCCTCGCTCAGTGGGTTAAGGATCAGTGCTGCCATG  
AGCTGTGGTGTAGGTCAAAGATGCGGCTTGGATCCTGAGTTGCTATGGTG  
TAAGACGGCAGCTGCAGCTCCGATGCAGCCCTAACCTGGGAACCTCATT  
ACGCCGTGGGTGCGGTCTTAATAAAAAAAAAAAAAAAAAAAGACAAAAAA  
AAAAAAGAAAAAGAAAAGAAAACAGCCAATAACTGACTGAGGTTTCAA  
TATCCTAACCTATGGAGAGAGTCAGCCCAATTACAACATCAACAGTAAGT  
GATAGCTCAGAGTGGCACTAACACCTTATATTTTATGATCCATGCTCTCAGA  
GCAACTGAATGTTTGTATCACAATGAGAGGAATTGATATAGTTAATTAGTA  
TATTGGAATTCTCCAGATGGTAGCCATTCCAGCGGCCAGCCAAGTCACA  
AATCTAAACCTAAGTCAGAGTGCAGTTACAGATAACACCTGTCAAAGGAA  
ACCTAAGCTGTATCCATCAGAGTTTCCAATTCAGCTCTAAGTCGCTTAC  
CTTCTAGAAAATAGGACTTTCTAGACTTATAGGAAAATACTGATCTGCCA  
GCCAAGCCTGCTTTGTTTTTACATTTGCTTCTTCTAATGCCTTATAAACT  
CACTCTTGCCCAACATCCCTCGGGAAATGTGCTTCACTTTAGAAAAAGAC  
ACAATACTCCTGTTGCTGAACTCAGCTTCTGTCTGCCAGTGCCATATTG  
AAATACAGAGACAGAGTTTGGGGCAAAGGAGAATAAAATAGCTTTATTGCT  
TTTGCCAGACAAAGGAGGGTACAGCAGTCTAATGCCCTAAGGACTGTGC  
CCCCATTAGAAAAGAACTGTGAGGAGTTTACAGTAAAAAGGAGAAAAGC  
GGTTTTTCAGATAGGAATCAGGATTGGAACAAGCAAGCATTTCTTCTTTCT  
TTGGGGGAATATTAGTCATCAAAGCTGGAGTCAGGAGATCTTTGCATGAT  
CCTGATGGTGGTCTTCTGGGTTACTGCCTAGAATAACAGTACTTGCGAAA  
AGGGCATATTGATCAGGGATTAGGACAACTAGGAAAAGTTCTGAAAATC  
ATCATGTGCTAATAATCTTTAACTCACAGGTGATTATGCTCAGGGTGCCT  
AATCTTTAGCTTTCAGGTGATTGTGCAATTAAGCCAGGGATGAGGACAAG  
GAAGGACTACAGGCTGTTTGGTTTTAAAGGGATTCTTTCTGAAAGAAGC  
ATAAGGAATACAACCTTTTAGGCATATAAGATGCCTATATTATTATGTATA  
TTCTTAAGAGGGAACCAGGATCTTGCCCAAGGCTGTACTATTTTCTCT  
TGACTGTTCCCTCCCTTGTCTTTGCATCCCTTCTTCCCTGATCAGCAAC  
TGTCTGAACCTGTCTTTGGGAACTCAGGGAAGGCCATGATGGCTGAGTGA  
GGCCATTTTCTAAGAACAAGAAAATAAGAGACACAGAAATGATTTTGTGC  
CCAGGAGCCCCACAGGGCCATGCTCGGTTTTCACTCCTTCAGTCCATGGAC  
TGCTTTTCTTGAATAAAGAACATCAAACCTTGGAGTTCTGCTGTGGCAC  
AGTAGATTAAGGATCAGTGTACCACAACCTGTGGCATAGGTTTCAACTGT  
GGCTCAGGTTTGTATCCCTGGCCAGGAACTTTTGGTGGGGACAAAAAGAA

AAAACATCATATTTGTTCTTTAATTGTTTTAGTTTTGTCAGTGACAAGAC  
AAAAGCAAAGACCAATATATGGTTAACACACTAAGAGACCAAAATTAATA  
GTTACTCTGTAAGGATATGAATGCTTACGCTGGAAGAGGCACTTTACACA  
TATTACCTATAACGCTTACAATTTTCAAATGTAAATTTAGTCATCCTCAC  
TTGCACACAAATAAACTATTGAGATAAACTAACACATATTAACATTTTTTA  
AGAGTTTTATTTGAGCAAAAATCAATTCCAATTTGGGCAGTGCAAACTAGA  
AATGATTAGGAGTGCTCCATAAAATAAGAAGTTGGAGAAATTCCTTTATAG  
AGAAAAGGTGAAAGCAAAGCAAGGAAATTAATTAATTTGGCTATAGCTTAA  
GCTGTTGCATTCTTTGGAAAATACAATTTGGCTGTTTTTAATTTATTGTAA  
ATGGGACCAGAGTAGGCCACCCCAAAAATATGCCTCTTTGGCAAAAGTAT  
TATCTTGATCTGGTTATTTTTTAACAAAACAGGGCATACTGAAAAGCACTA  
AAAGCTGAGAAGTTACCCTTTTGTAAAGGAAATTTACATTTATAAGGGAAA  
TCTAAATTTATGAGTGTCTCTCTATATATAACCAGGAAGAGAAGGCTGATT  
CTAAATCCCAAAAATTTCTTATCAATGGAGAAGGCTCAGACTCAAATCTT  
CCTAACAACTTTACCCTTTACTGTGCTTTTTTTGATAACCTCCTATAACTG  
GATCCCCAACTCCAGAGTCTTTCTTTTGCCTTCAGCAGATGATAGCATT  
TAAGGGTGATGGCTTGACTATTTTGGAGAGTCACACAGTTTTCTTAGGT  
ATCTCCCATGTACCCAGGAGGTATGCGTGTTATTAATAATCTGGTTTTTT  
TCCTGTTAATCTCTCTTTTATTAAGGTGAGAGGCGATGTCAGGCAAGA  
CCTTGGAAGGGTAGAGGGAAAACCTTTTTCTCCCTACAGAACCAAAACA  
GAAAGAGGAGTCTTTCTTTCCCATTTATTGTTGGGGGGAAACAAACAACC  
TAAAGAAAGGACAAAGTACAAGGAAATGTTTCTAAAGGAAATGATTACA  
AATATAAGGGGCCACTGTTTATTCAAACTGAAATAAGCTAATGAGAAA  
GGAGAGTTCTTTAAAGGGACAGATTGACTTAAAGTATATATGTCTAGAA  
ATAGGAAATGTATGAATAACTCAAACATCAGAAAAGCCTGGTGATTAAGA  
GAGTGGACTGTAGATAGGTAGACATAGATCAAAAAGCCTTTTTCTTAACA  
GCTGTGTAATCTTAGATATTTAATCTTTCTTTCTAAGCTCCATGGCCTC  
ATCTGTAAATCGAAATTAACCTTTGCTATTTACCTTATAATGTTGTGAAGA  
TTAAATGAGAAAATCCATAAGCCATAAAAATCAACTGAGTAAATTTTAAA  
TATCTTATTGGGTTTATTCAATAATTCATGAATCAGGCGGCATGCAATCT  
AGCAAACAGAAAGGAGCTCTGAGGAGCTGCACAAAATGAAAACCTTTTTAT  
AGGCACACAAGAGCAGAAAAAAGGAAGTTGCTCTAGGCCAAAAAGCAGAT  
TGTTTATGGCAAGTTTACTTTCTTTAGAGGATGGTATCACTGTTGGGCT  
GCATCCTGCAGGCCTATAAGCCTGCACTTGCCAGGTTTAAAACCAAAGA  
AAGAGCCTGGAATCAGCAACAAAGACATCAATAGTTTAAATGGATGGAGGA  
GTTTACACTTCTGAACCAAGGTCTTAGAATGATACCTCACCACGTGCAGC  
AGATGACAGGCAGGACAGGGCAGCAGGCTTCACTCCCTGAGGGAATGGGA  
GATTGCCAGTTACAGGAGGCTGGCTTATTAGTTACCAGGGAAGGCAGCAG  
AGGGGCACATCCCTCACTGCCCCCTTTGACATGAACGATCACCCACTGGTG  
CCTGGGGCATGTAGGAAGTTCAGCCATGTGAATAAAGTACAGGTGAAGTA  
GACACTGGTCAGCCAGGGGATGTACAAAAGAGCAAGAGAACGGCCATCTTT  
GGTGACCTGACCATAACAACCACTCCCTGATTTCAAATATACTAAAAG  
TTATAGCCATCAAAATAGTATGGTTCAGACCCAAACCAACACATAGATC  
CCTGAAACAGAATAGAGAGCCCATAAATGAACCCATACTTATATGTTTAA  
TTAACCTATGACAAAGGAGGCAGGGATATACTATAGGGAAGACAACCTC  
TTCAATAAATGGTATTGGAAAAAAGTGGATATCTACATGCAAAAAGAAATCAA  
ACTGGACTATGTTTTACACCATATATAAGATGGGTTAAAGAATTAACCTA  
TAAGACATAAAACATAAACATTTCTAGAATAAAAACACAGGGGTATGCTCTT  
TGACATCAGTCTTAGCAATATTTTTTTGGATATGCCTTCTCAGGCAATGG  
AAACAAAGGCAAAAATAAACAAATGTCACTACATTGAACTAAAAAGATTT  
TGCACAACAAAAAAGTGATCACAAAAATGAAAAGACCGCCTGCTGAATG  
GAGGAAGATACTTGCAACGATATCTGAAAGGGGTTAATATTTCAAAGTA  
TACAAAGAAGTACACAAACCTCACAACGAAAAAACAATAAATAAACA  
ACGCAATTAATAAATGGCAGAGATTGGAGTTCCCACTGTGGCACAGCAGA  
AGTGAATCTGACTAGGAACCATGAGGTTGCGGGTTTGATCCCTGGCCTCG  
CTCAGTGGGTTAGGGATCTGGCGTTGCTGTGAGCTGTGGTGCAGCTCCCA  
GACTCGGCTTGGATCTGGCATTGTTGTGGCTGTGGCTGTGGCGTTGGTCA  
GCGGCTACGGCTCCGATTAGACCCCTAACCTGGGAACCTCCATATGCCGA  
GGGTGTGACCCTGAAAAGACAAAAAAGACACACGCACACACAAAAATTG  
GCATAGATTGATGTGCCCCCTCAAAAAACAATAAACAACCAAAAA  
AAGGCAGAGGACTTGAACAGACACTTTTCCAAGAAGACTTACAAATGGC

CAAAAGGCACATGAAAAGATGCTTAGGATGAGATATCACTTCACACCTAT  
CAGAATAGTTATTATCAAAAGAATCAATAACAAGTCTTGCTAAGGATGTG  
GAGAAAAGGAAACCTTTGCACACTGTTGGTGGGAATGCAAATTTGGGCAGC  
CACTATGGAAAACAGTATTTGAGGAAATGCCTCAAAAAATATATGATCTA  
GCAATCCCACATCTCGGTAGCTATCTGGAGAAAAACATAATTCAAAAAGG  
TATAGGCAGGAGTTCCCATCATGGCTCAGAGGTAACAAACCCATCTAGTA  
TCCATGACGACATGGGTTTCGATCCCTGGCCTCGCTCTCAGTGGGTTAAAG  
ATCTGGCATCTGTGGTGTAGGTTGCAGACTCAGCTCAGATCCCAAGTTGC  
TGTGGCATAGGTTGGAGGCTGCTGCTCTGATTTGACCACTAGCCTGGGGA  
CTTTCATATGCCATAGGTGTGGACCTAAAAAAGCCAAAAAATAG  
CATGCCCCCCCCNNCCATGTTTCATTGCAGCATTCAATACAATAGCCAAGT  
CATAGAGGCAACCTAAACATCCATTGACAGAGGAATGGATAAAGAAAAATG  
TGGTTTATATAACCCAAAGTGATATTATCAGCCATAGCAAATAGTGAAATA  
ACGCCATTTGCAGCAATATGGATGCACCTAAGATTATCCTACTAAGTGAA  
GTTTTGTCAAACAGTAAAAGACAAAAGACCATATGATATCACTTATATGTGG  
AATCTAAAAAAGGATACAAATAAAATATTTCTAGTTTGAAGTTCAGAAA  
TAGATTCACAGACATTGAAAATAAACTTATGGTTACCAAAGGGGACATGC  
AAGAAGGAGGGATTAACCTGGGGATTTGGGATTGGCATATGCACACTGTGG  
TATATAGAATGACTGGCCAAATGGGACCTGCTATATAGCACATGGAACCTC  
TACCCGGTATTCTGTGATAATCCATATAGGGAAAGAATCTGAAAAAGAAT  
GGATGTGTATATATGTGTAACCTGAATCAGTGT'TTGTACAGTAGAAATAA  
TTACAACATCATAAATCAACTATACCTCAATAAAACTTTTAAAAAATGAA  
AAAAATATATTAAAAAAATTTTAAATTCGAGCCACCATACAATCCAGCA  
ATTCCACTCTTGTGTATTTGATGAAAAGGAAAAACTAATCAGAAAAAGAT  
ATATGCACCCCAATATTCATTGCAGCATTACTTACAACAGCCAAGATATG  
GAAGCAACATTAGTGCCCATCAATCAATGAATGAATAAAGAAGGTGTGGT  
GTATATACACAATGGACTATTACTTAGCCATTAAAAAAAGAAGAAGAA  
ATCTTGCATGTGTACACCATTGGATGGACCTAAAGAGTATATGCTAAGT  
GAACTAGTCAGAGAGACAAACACTGCATAAATTTCACTTATATGTGGAGTC  
TAAGAAAAATAAATGAACAAGCATAACTAAGTAGAGGCAGTCATAAATACA  
GAAAACAAACAGGTAGTTGCCAGAGGGGAGGGGATTGCCAGAAAGAGAA  
ACAGGTGAGGGAGATTAAGAGGTACAAATTTTGGTAGCAAAATAAATGA  
GTCTTGAATATGAAATGTACTGGGTGGGTAACATAGTCAATTAAAAAA  
AAAGACTGGGATAGTCTAGCCACTGCTTCCAGTGGGGATAGTGTTCAA  
GGACCTGCTTTGGGAAAGACAGATAAATGCTATAAACTCAAATGACTTCA  
GCTCTAGACATTGTGAGATTCCAGCCACTTGATTCAGAAGATGCTCTTTT  
CTCTTTTCTCTGCTTGATTGGGTTTTGTTGCTCTTCCATAAAAACTG  
ACTGCCCTTTTCAGGGATCCCTGTAATTGCTTTATCAGTCCTTTCAGGGT  
TTCCTTTTTTACAGCCACTTCCCTCAAGAGCTGAGCCACCCTAGGCAACACT  
ACAATCAACTGCTGACCTCAAAGGAGGAGGAAGTCTGGTAGGAAAGGCAA  
CCACAGAAGGGGAAGAAGAGAGAAGGAATGATGAAGTTATAAAAAGACGGT  
TTGAAGGAGCTCAGCTAGATCTACACAACGGCATCGCCAGTCTACCTAGG  
AAATCTTCCCTGTGGGAATTGATGTCTTTGTGTTAAAGCATTTAACACACA  
TTGAGGTCTTTAAAGCACGTACCTTTAACAACCTTTTAGAAATGCAGAT  
ACCTTAAACTCTGTGGATTACTAACTTCAGAGTATGGATTTGTTTCGGTCT  
TTTTTCAGAATAGCAGAGTCTGAAGAATTTTCATGAGAGGAGAGAGAAAT  
CTGAGAGAACGAAGGGCTATTTCTCAAGAAGCAAGGACCCGTGAAAAATG  
AGGGGCTTAAACAACAGAGGGCTATTTATCTCCGAGGACCCATATTGGGA  
AGGGAAAGATAAGACAGATTTTCAGACCCAGCTTTGCCACTATGTGGTCAT  
GGGAAAGGCACTTTTCTTCTCTGGGCTCAGTAAAGTAAGGGGGATGGACA  
CGATGCTCTTTATCAGATATGATTTTTGCAAGTATCTTCTCCAAGTATG  
GCTTGTCTTCTTACTCTCTTGACAGTGTCTTTGCAGAGCCAAAGTTTTA  
AATTTTATTAAGTCAAGTATCAATTATTTCTTTCACACCTTTTTTTTTT  
TTTTTTTTTTTTTTTTTGTCTTTTTGCTATTTCTTGGGCTGCTCCGGTGGC  
ATATGGAGGTTCCCAAGCTAGGGGTCGAATCAGAGCTGTAGCCACCGGCC  
TATGCCAGAGCCACAGCAACATGGAATCTGAGCCGCATCTGCGACCTACA  
CCACAGCTCACGGCAACACTGGATCGTTAACCCTGAGCAAGGGCAGGG  
ACCGAACCCACAACCTCATGGTTCCCTAGTCGGATTTCGTTAACCCTGCGC  
CATGACAGGAACTCCTCTTTCACACTTTTGATGTTGTATTTAAAAAATCA  
TTGTCTGGACACAATAGAGATTGTCATACTAAAGGATAGGTTCCCGGAAG  
GATAGTGACAGGACCCACCCACCCACCCCGGCCCTGAATGTGGC

TGTTCTCCTTGGAGACCTGCTGCAGACATGGGTATGGCCAGCACGAGATT  
TATTCCTTTCCAGAATGCAGATGCTCAAGTGGGGCAGCAAGAAACAAT  
GGCCTACAGGAAAACAACCTGCCTGCATAGATTAACAACCCACAAGGATTA  
ACTGCCTTCTGTGCATGGGACTTCATCCCCTACCCTTCCCCTCTTCTCCT  
TCACTGTTCTGTGCACAAGTTCCCCCATAAACTCCGACCACAGATTGCC  
CCACAGATCCCTTATAAGCCTAGCATCCCCTCACAGTTGGCGCTGGTACC  
ATCTTGAGCTCAGCCCATCCACTTCAGATGCCTTAGTAGATCTCTCTCAA  
TTTACTGACTTGACTTTGCTCATTCTCCTTTGGCAAACACTAAGTGAAG  
TAAATCAGAGATAGAAGGACAAATACCATATGATATCTTGTATATGCAGA  
ATCTAAAATACATCACAAATGAACCTATCTACCAAACAGAAACAGACACA  
TGGACAAGGAGAACAGACTTGTAGTTGCCAAGGGGAGGGAATTGGGGAG  
ATAGATTGGGAGGTTGAAGTTAGCAGATGTAAGCTATTAACATGGAGGGG  
ATAAACAATATGGTCCCCTATGTAGCACAGAGAACCATATTC AATGTCC  
TATGATAAAACCATAATAGAAAAAATATTTTTATTTTTATTTTTGGTTTTTTTT  
TTTTTTTTTTTTTTTTnnnnnnnGTCTGTTTGGCATTCTTGGGCCGCTCCCA  
TGGCATAngGAGGTTCCCAGGCTAGGAGTCGAATCAGAGCTGTAGCCACC  
GGCCTACGCCAGAGCCACAGCAATGCGGGATCAAGCTGCGTCTGCnACCT  
ACACCACAGCTCACGGCAACATCAGATCTTTAACCCTGAGCAAGGCCA  
GGGATGGAACCCGCAACCTCATGGTTCCTAGTCGGATTCTGTTAACCCTG  
CGCCATGACGGGAACCTCCATAAAAAAAGAATATTTTTAAAAAGAGTGTATG  
TGTATATATATATTCAGAAATATATCTGAATCACTTTGCTGTACAGCAGA  
AATTAACACAATATTGTAATCAACTATACTTCAGTAAAAAAGTAAAAAT  
TTAAAAATACATGATAAGTCATTTTATACTCAAGGTCATTTAGATTTTTTC  
ACCTTTATTATCTTCTAGGGTTTTATAATTTTTGTGTTTTGCATTTAAGTC  
TATGATCCATTTCTTCTTTTTTTTTTTTTnCGTCTTTTGTCTTTTGAGGG  
CCACACCCTCAGCACCCAGAGCACATGGAGATTC CAGATTAGGGGTCAA  
ATCGGAGCTGTTGCTGCCGGACTACACCAGAGCCACAGCAATGCCAGATC  
TGAACGTGTCTGCTCAAACCTACACCATAGCTCATGGCAACACCAGATCCTT  
AACCAGTGAGCAAGGCCAGGGATTGAACCCGCAACTTCATTGTTTCCTAG  
TGGATTCAATTTCCACTGCGACATGACAGGAACCTCCTATGATCCATTTCAA  
GTTAATTTTTTGTGAAGTGTGTATGTTTGGTATCTAGATTCTTTTTTTTTT  
TCTTTTTGGTCTTGATGCCTAGTTGTTGAAAAAATATCTTGGAGTTCC  
CGTTGTGGCTCAGCACTAGTGAAACCCGACTGATATCCATGAGGATGTGG  
ATTTGATCCCTGGCCTTCTCAGTGGGTTAAGGATCTAGCATTGCCCTGA  
GCTGTGGTGCAGGTTACAGACAAGACTCAGATCTTGCAATGCTCTGGCTG  
TGGCATAAGGCCAGCAGCTGTAGCTCTGATTCAACCCCTAGCCTTGGAAC  
TCCATATGCCACAGGTGTGGCCATAAAAAGCAAAATAAATAAATAAATAA  
ATAAAGGCAGTGAGGAAAAAGAAGACTATCTTTTCTCTGTTATACTGCCT  
TTGCTTCTTTTTTTTTTTTTTTTTTTTTTTTTTTTTTTTTTTTTTTTTnTnTTTTTnnnnTTTCT  
TTGGCCGCTCCCATGGCATATGGAGGTTCCCAGGCTAGGGGTTGAATCGG  
AGCTGTAGCTGCCAGCCTACGCCAGAGCCACAGCAACGCGGGATCCAAGC  
CGCATCTGCAACCTACACCACAGCTCACGGCAACGCCAGATCGTTAACCC  
ACTGAGCAAGGGCAGGGATCGAACCCGCAACCTCATGGTTCCTAGTCGGA  
TTCGTTAACCCTGCGCCACGACGGGAACCTCCCTTGTCTGTTGTAGAC  
AATTCTGTTCTAGTGGTTTTGTCTATTTTTTTGCCAATAACAGGATATTCT  
TTAAGATTTCTTCTCTGTTCTAACCAGTTCTTCTGTTCAATTAACCTATAT  
GTAAATGAAGAAAAACACAGATTCTTTCCAATTTTACCCAGCTCAGACT  
CCAGACTCTACTTCTTCAATAGTGATTTCCAGGCTGAAAAGTGACCAA  
TCTTCCACAATCTGTAGGGAACAAGAGAGTATTGGGATCCTGGGTACAC  
CAAGATGGGCTGCTCTCTGGGGCAACCACAGAAGGTTGGACAAAAGAGA  
TAGCTTACAGCGACTGCTATCCTAAGCAGGTGCTATGCTAGAAGGGAAGA  
ATAATGCCATCACAGGAAAGAAAGCAGAAGAGTCAGGAGATGAGAAGAC  
CATTAAATCAGGTATCTGGAGCAGAAATACTGAAAGATGAGAAGTTGGAGA  
CAGATGGAAGGGTGGTAGGTCCAGATTCAGTCTGAAACAAATCTTGTCAA  
CATGAAGTTCCCTCCATACATTCCTTTTCATGCAATAACTGGCAGATTTCT  
AGGAAAGGACAGATCCTAAAAGGATAAGAATATAAATAAAGGATCTCCT  
CTGACCATAACAGTGAGGTAAAAGTCACAAATATAAACTAGTATTATTGC  
TAGCTGAAGAGTGTTATGGAAAAGTCCCTCCATAGGGGTCACTTTATCAA  
TCTAGAAACTGGGAAAAATTACTTTGTACAAGAAGACAGTGGGGGAGTTC  
CCATAGTGGCGCAGTGGTTAACGAATCTGACGAGGAACCATGAGGTTGTG  
GGTTTGATCCCTGGCCTCGCTCAGTGGTTATGGATCTGGCATTGCCCTGA

GCTATGGTGTAGGTCACAGACGTGGCTCAGATCTGGCATTGCTGTGGCTG  
TGGTGTAGGCCGGCGGCTGCAGCTCCGATTGGACCCCTAGCCTGGGAACC  
TCCATATGCCGCGGTTGTGGCCCTAAAAAACAAAAGACAAAAAAAAAAAA  
AAAGACAGTGGGGGGAGTGGCCATCATGGTGAAGTGGAAACAAATCTGAC  
TAGGAGCCACGGGGTTGTGGGTTTTGATCCCTGGCCTCGCTCAGTGGTTAT  
GGATCTGGCATTGCCCTGAGCTATGGTGTAGGTCACAGACGTGGCTCAGA  
TCTGGCATTGCTGTGGCTGTGGTGTAGGCCGGCGGCTGCAGCTCCGATTG  
GACCCCTAGCCTGGGAACCTCCATATGCCGCGGTTGTGGCCCTAAAAAGA  
CAAAAGACAAAAAAAAAAAAAGACAGTGGGCATTCCCAGCTAAGCATCT  
GTTCTTTTCTATGGCCCCAGTGTCACTACAGGCCCAAAAAGAAGACTT  
TTCTCTGGCAAAGGTACAGAGTAAGTGGGCAGGCTGGAGTAAACTTGGGC  
CCTGTGAGAATTGTAAAAATGATACTAGGTCCCTCAGGGATAACTGCAGGGC  
AATAATGCTGAGGCTGGCAATAGCATCAAATACTAAGTAAGGGAGAACTT  
GCCCAAGAGGAAGCAATTAAGTAGAGACTGAGTGAATCAATGAACATCCA  
GTGCTTTAACCCTCTGTTGTCTCTATACTGATAAAAATGGGGGGATGGTGG  
GAGGAGAAGATGAACAAATAAGTAGAGACAGGAGTCTCTGCTCTGGGGAA  
CTCTCATTATAATGGCAATGACAGGATATATGCAGGAAACATATATAAAA  
ACAGAATAAACACATCCTATCTTTACCTGTGTTACCATAGTAGAAATGA  
GCTTTGAGTTTGTGACTAGAATTAGAAATTGAAGACAATTATGAGGATTT  
GAAAAGATAATTATTAAGTGTAGAGCCAAATCATTATCAAAAAGGTTT  
TGATTTTCAGACACAGCTGCCAATTAGCTGCAAGGTAGGTCTGAATCTCAA  
GCAGTATTAACATAAAATTTGAGAAAAACTGAGCAACAATAAGAGAGAAG  
CTAAGAGATGAAAGTTTACACCATCAATAGTTATGATAGTCATAAAATCA  
AAATCATATTTGTATTATAAGCCACAAAGCCTCAGTGAAAAACAAATACCA  
ACATCACCAGTGGTGAACCTTAGCACAAAAAAGATTGCAAACTGAACTA  
GTGATGAGAAGAACATATAGGAATCCTGACATCATTCATGGCTCCTGCT  
TATGTAAACCCCTGTCATAATTAGGGTCTAATTCTTAATCACTTTTGATG  
AGGAGATTTAAACACACACAGATAAGACAGAAACAGAGGGAAAAAGAAAA  
AAAAAATGGAGGTACTAAACAACCAAGCAAGCAAAATGATAATATGGCAGTA  
GAAATTACTTACATATTGATATAAGTAGATTAAATTCACCAATCAAAAA  
TACAGAGGTGAGAAAGTTCCCACTGTGGCTCTGGAGTATTGAGTCAACTA  
GTATCCATGAGGATGCAAGCTCAATCCCTGGCCTCACTCAGCGAGTTAAG  
GATCCAGTGTGGCCTGAGCTTTATGTAGGTTGCAGACACAGCTCAGATC  
CTGCCTGGCTGTAGCTGTGGTGTAGGCCAGCAGCTGTAGCTCTGGTTTGA  
CCCCCAGCCTGGGAACCTCCACATGTCACTGATGTGGCCCTAAAAAGCAA  
AGCAAAACAAAACAAAATAAACAAAACAAAACAAACCAAAACCAACCATC  
CAAACAAAACAAAACCAAGAGTGGGAATTCCCCAGCATTTTAGCAATTAAG  
GATTCAGCATTGTCACTGCTATGGCTCAGGTTCTGTCTGGCCTAGGAAC  
TTCTGCATGCTATGGGCAGGGCCAAAAATAAATAAATAATACAGAGTGAC  
TGGATGGATTTAAAAAAGAAAAAACAAGACCCAACTATGTATTGC  
CTACACGAGATTCATTTCAATTTCTAAAGACATACATAGGCTCAAAATGAA  
GGGTTGGAAAAGGATATCCCACACAAGTGGAAATCAAAAAGAAAGAGGCA  
TAGCCATACTTATATCAGACTAAATAGACTTCAAGCCAAAAGTAGTAACA  
AGAGACGAAGAAGATGGTTATGAAATGGTCACTACATCAAGGAGCTATTA  
CACTTGTAATAAACACACACACACAATATCAGAGCACCAAACTACATTA  
AGCAAATACATAACAGATATAAAGGCAGAAGTAAACAGCAATACAATAATA  
ATAGGAACCAAGATTCCCCTGGTGGCTCAGTGGTTAACGAATCTGACTAG  
GAACCATGAGGTTGCGGGTTCGATCCCTGGCTTTGCTCAGTGGGTTAAGG  
ATCCAGTGTGGCATGAGCTGTGGTGTAGGTTGCAGATGTGGTTCCGGATT  
CCAAATTGCTGTGGCCCTGGCGTAGACCAGCGGCTACAGCTCCGATTCTGA  
CCCCTAGCCTTGGAACCTCCATATGCCATGAGAGTGGCCCAAGAAATGGC  
AAAAAGACAAAAAAAAATAAATAAATAAATAATGGGAACCCAGGAACTTT  
ACTGAAAAACTGGAAAATAAATAAATTTTTCAGAAATGGGAAAAAAAAAA  
AACCAATAGTAGGGGAATTTAACACCTCATGGTTAGCAATGGATAAGTCA  
TCCAGATAGAAAATCAAAAATGGACAAGTACCTATTGAGTTAACAAACAT  
ATATAGAACACTCAACAGTAGCAAAAATAGACAGAACACTCTCCAAGACAG  
ATTATATGATAGGACCCAAAACAACCCCTTAGCAAAATTTAAGATTTAACTC  
ATACCAACCAACTTTTCTGATTACAGTGGTATAAAAATAGGAATCAAGAG  
CTGAAGAAAGCCATTGGAAAATCTGACAACCTCATGGAAAATAAATGACA  
CAGTTCTAAACAACCAATGGGTCAAAGAAGAAGTCAAAGGAGAAAATAAAA  
ATTATATCTAGGAGTTCCTGTATGGCTCATTGGTTAACAAATCTGACTA

GGAACCATGCTGCAGGTTTGGATCCCTGGGTTAAGGATCTGGAGTTTCCAT  
GAGCTGCAGTGTAGGTGGCAGACGCAGCTCAGATCCCATGTTTCTGTGGC  
TCTCGCGTAGGCCGGCAGCTACGACTTCAATTGGACCCCTAGCCTGGAAA  
CCTCCATATGCCATGGGTGTGGCCCTAAAAAGACAAAAAGACAAAAAAA  
TTATTTCTAAACAAATGAAAATGGAAACATTATATCAAAACTTATGGGAT  
GCAGAAAAAGCAGTTCTGAGAGGAAAAGTTAACCACAATAAATGCATATAT  
TAAGAAATTAGACAGCAACATGGATGCAACTAGAGATTCACATACTAAGT  
GAAGCAAGTCAGAAAAAGAAAGACAGATATCATATGATATTACTTTTATG  
TGGAATCTAAAATATGACACAAATGAACCTATCAACAAAACAGAACTGA  
CACACAAACAGAGAACAGAATTGTGGTTACCAAGAAGAAAAGGGGAGGAG  
TGTCTTGGACTGGGAGTTTTAGTTGGTAGATGCAAACTATCATATTTAGA  
ATGAATAAGCAATAAGATCCTATTGTATAGCACAGGGAATGAAATCCAGT  
CTCTTAGGACAGAACATGATGGAAGATAATATGAGAAAAAGAAATATATA  
TATGTGCGATTTTTGTCACTTTGTTGTACAGAAGGAATTGATAGGACAGT  
GTAAATCAACTATACTTTAATAAAAAATAAAATTTAAAAAATGCCTTTGA  
GAAAATAAAGATTTTTAAAAAGCTGAGAAAAAAGAACTGGAGTTCTG  
TCATGGCTCAGTGGTTAACAAACCCGACTAGCATCCATGAGGATGTGGGT  
TCAATTCTGGCCTACCTCAGTGGGTTAAGGATCTGGCATTGCCAAGAGC  
TGTGGTTAGGTCAAAGACACGGTTCGGATCCTGCATTGTTGTGGCTCTGG  
CGTAGGCTGGCAGCCACAGCTCTGATTAACCCCTAGCCTGGGAACCTGCA  
TATGCCACAGGTGTACGGCCCTAAAAGATAAAAAGGGACAAAAAATCAGA  
GTTCCCATCATGGCTCAGTGGTTAACGAACCCGACTAGTATCCATGAGGA  
TGTGGGCTTGATCCCTGGCCTCAGTGGGTAGGGATCCACATGCTGTG  
GCTGTGGTGTAGGCCGGCAGCTATAGCTCTGATTTGACCCCTAGCCTGGG  
AACCTCCATATATCACGGATGTGGCCCTAAATAGACAAAAAGACAAAAAAC  
AAACAAACAAAAAACTAATTTTATTACCTCATGAACTTGAAAAAGA  
ATAAAGTTAGCAAAAAGGAAGTAAATAATAAAGATCAAAGTGGAAATAAAT  
AAAACAGATACCAAGAAAAACAATAGAAAGGATTGACAGAACTAAGAAA  
TGGCTCTTCAAAAAGCTAAAACAGGAGTTTCCATTGTGGTGCAGTGGAAA  
CAAATCTGACTAGTAACTATGAGGTTGCAGGTTCAATCCCTGTCTCCCT  
CAGTGGGTTAAGGATCCGGTGTGGCAAGAGCTTTAGTGTAGGTGCGCAGA  
TGACGCTTGGATCCTGAGCTGCTGTGGCTGTGGGGTAGCCTGGAAAGCTGT  
AGCTCAGATAAGACCCCTAGCTTAGAAACATCCATATGCCGTGGGTGCAG  
CCCTAAAAAGCAAAAAAAGCTAAACTGAAATTTAGTTAA  
ACTAAGAAAAAAGAGAAGATTCAAATAAAATAAAATTAATAAAATTAGA  
AATACAAAATGAGACCTTACAACCTGACTACAAAAATACATAGTATCATAA  
GAGATTATTATGAACAATTAATTATATGCCAGAAAATTAGGTAACCTAGA  
AGTGGATAAAATTTACAGAAGCACACAACCTACCAAGACTGAATCATCAAC  
AGCTCTGATTTGACCCCTAACCTGAAAACCTCCATATGCAGCAAGTGCAG  
CTCTAAAAAGCAAAAAAAGCAAAAAAAGCTAAACTGAAATTTAGTTAA  
AAAATTTGAACAAACCAATAACAAGCAGGGAGATTTAATCAGTAATAGAA  
AAACCCAGAACAAATGACCTCACTGGAGAATTCACCAAAACATTCAAAG  
AACAAATTAACACCAATTCTTCTCAAACCTTCCAAAAAATTGAGGAGGGA  
ATACTTCCAAATGCATTCTACTAGGTCAGGATTATGTTATACACTATAAC  
CAAGTGGGATTTATCCCTGGGAGGAAAGAATGGTTCAGCACATGTAAATC  
AATAATGTAACATATCATATTAATAAAATGAAAGATAAAATCACATAATT  
TTCTCAATAGGTGCAAGAAAAATATTTGACAAAAATAAAATATCTTTAAT  
GATTAAAAACCCCTGGGAAAATTTGGGTATAGAAGGAATAATAACATAATAA  
AGGCATATATGACAAAACCACAGGTAACATTATACCCAATAGAGAAAAGT  
TGAAAATTTTTCTCTAAGATCAGGAACATGACGAGGATGCCAACTTTCA  
CCACTCTTATTCAATATAGTACTGGAAGCCCTAGCTAGACTAGGGCTAGA  
CAAAGGAATAAAAGGCATCCAGACCAGGGAGAAGTAAAAATTTCACTTTT  
TGCCAATGATACGATTTTATACATAGAAAATCCCAAAGACGCAACAAAAA  
TTTTTTGGAAATAATCAACAATTTCACTAAAGTTGCAGACTACAAAATCAA  
CATAAGATATCAGTTGCATTTTTGTACACTAATGATAAAACAACCTGAAA  
AAGAAATAAACCTATCCTAGTCACAACAGCTTCAAAAAAATAAACTACT  
TAGGTACAAATTTAACCAAAAAGAAATGAACAGCTAAAACTACAAGACTTT  
GCTGAAAGAAATTTGGAGAAGACATAAAACAAATGGAAAGGACATTATATGTT  
CATGGATCTGAACAATTAATATTATTAATAATGTCATACACTCAGGTCAT  
CTATAGATTAATCCCATCAACATACCAATGGCATTCTTCACAGAAATA  
GAAAAAATAATCCTAAAATTTGTATGGGACCACAAAAGACCCCAATGG



CTAAAAAATACTATTTCAGGAAAAAGAACAAAGTCAGAGATAACACACTTC  
CTGATTTCAAACACTACACTACAAAATTATAGTAATTTAAAAAATAAAA  
TAAAAGACCAATGGAATAGAATAGAGAGACCAGAAGTAAATCCTTGCTTA  
TATAGTCAACTAATATTTGGTAAGGGAGCAAAGAACACTCAGGGGGGATA  
AAATAGACTCTTCAACAAATGGTTTTGGGAAAACCTGGACAAACACATGTA  
GAGCAATGAAATGGGACCTCTATCTTACAAAACCCACACACACAAAAAAA  
TCACTCAAAATGTATCAAAGATTCAAACATGAAACCTGAAAGCTACAAAAG  
TCCTGTAAAGAAAATATAGGGTAGAATTTGTCAATTTTTTTAGATATGACA  
ACAAAAGCAAAATTTGGCAAATGGGATTACATAAAAATTTAGAAGCTTTTGC  
ATAGCAAAAAGAAACAATGAACCAAATGAAAAGACAACATACAGAATGGGA  
GAAAAAAGCTAGCAAGCCTTGTATTGGATTAGAGGTTAATATACAAAATAT  
ATAAAGAAGCTCATAGAAGCTCAATAGCAGAAAAAGACCAAAAACAAAACAAC  
AACGAAACTGAACAACCAAAGAGCCTGATTAATAAATTTGGCCAGGGGATTT  
CCTGTTATGGCGCAGCAGAAAACGAATCTAACTAGTATCCATGAGGACTCA  
GGTTTTGATTCTGGCTTCTCTCAGTGGGTAAAGGATCCAGCTTTGCTTTG  
AGCTATGGTGTAGCTTGCAGATGTGGCTCAGATCCTGTATAGCTGTGGCT  
GTGGCATAGGCCAGCAGCTGTAGCTCTGATTCAACCCCTAACCTGGGAAC  
TTCCATATGCCACAGGTATGGCCCTTAAAAAATAAATAAATGACCAGAATA  
GCTAAATAGACATTTTTCCAAAGACATCTAAATAGCCAACAGGTACATGA  
AAAGACACCTAACATTACTAATCAGTAGAGAAATACAAATCAAACCACA  
GAGAGATATCACCATATACCTGTTAGAATGACTATCATTAAAGAAGACTGT  
TGAGGATGTAGAGAAAAAGGAACTTTATACAGTGTGGTAGAAATGTAA  
ATTTGGTTCCACCACTATAGAAAAACAATATAGAAGCTCCTTTAAAAATTA  
AAATACTGGAGTTCTGTGCATGGCACAGAGGAAATGAATCTGACTAGCAT  
CCATAAGGATGCAGGTTCCATCCCTGACCTTGCTCAGTGGGTGAGGATC  
TGGCATTGCCATGAGCTATGGTATAGGTCGAAGATGTGGCTGGGATCTGG  
CATTGCCGTGGCTGTGGTGTAGGCCAGAAGCCACAGCTCCGATTCGACCC  
CTAGCCTGAGAAGCTCCATCTGCTGAGGGTGTGGCCCTTAAAAAATAA  
ATTTTTTTTAAAGTACTACTACCTTGTGAATAAGAATCCTACTTCTCGGTTG  
ATATTCGAAGGATATGAAAACAGGTTTAGAAAAAGATAAATGCACTCCCAT  
GTTTCATCATAGCATTGTTTTTATTTTTTATTTTTTCCATTATAGTTGATTT  
ATAGTGTCTGTCCATCACAGCATTATTCACAAAAGCCAGGATACGGAAA  
CAACCTAAGCACCTAGGAACAGATGAATGGATTAAGAAGATGTGATATAA  
ACATGGAGGGTATCCTGCCATTTATGACAATGTGGATAAAAACCTGAGCAA  
ATTATGCTAAGTGTAGATAAGTACAGTAAGACAAGCACAAGAGTATGATA  
TCACTTATATGTTGAATTTTTAAAAGTAAAACCTGTGGAGTTCTACTGT  
GGTTCATTGGCTTAAGACTAAAGCTGCAGCTTAGATTTCATCCCACCCAG  
AAATGTCCATATACTGTGGGTGCGGCCATTAAAACAAAATTCATTTATTC  
CTTCCAAACTTGCACTTGTGTTGTCTATGATCTACTCTGTTACCTAAGTCA  
AAATCCTTCACTTATCCTAAATCCCTTATTCTCCTTCATCATTGCTATCC  
AATCAATAATTAATTTTTCTCAAAAAAACCCCTTCTGCTAGTTATTAGC  
AGTATAAACTTTGAGCAAGTCACTTAATTTTCATGGTGCTTTGCTTCTCC  
CACTTGTAAAATAGGAGCAATAATAGTTCAATTACCTCACCAGTTTGATA  
TGAGGGTTAAATAAGTTAATTTATTTATTGTTTAGAATGATGCCTGAACAT  
ATTCTCTGCCAAAATATTGAAATAGAATCTTAACTAGTCTTCTTCTCTC  
TCAGTCTGGCTCCATTACAATCCATCTTCAATAACTGTTTTCAAAAAGAC  
TTATCGAAATATTTTTCAACACAACACATCATTAAAGAAGGGAGGGACCA  
CAGACTAGGAAAAGATATATGTAATAGTTATATTTGACAAAAGGATTCATA  
TCAACAATACATAAAGAATTTCCCCACCCCTCAAAAAAAGGACTTCCC  
ATCGTGGTGCAGCTGAAATGAATCTGACTAGGAACCATGAGGTTGCAGGT  
TCGATCCCTGGCCTCGCTCAGTAGGTTAGGGATCCAGCATTGCCGTGAGC  
CGTGGTTTCAAGTTGCAGACACAGCTCGGATCCAAGTTGCTGTGGCTGTG  
GCATAGGCCAGCAACAGCTCCGATTAGACCCCTAGCTTGGGAACCTCCAT  
ATGCCGCAGGTGCAACCCATAAAAAACAAAAAGACAACAACAACAAAA  
GAATACATAAAGAATTCCTACAAATCAAAAAGAAGAAGACAGACAAACAA  
ATTGAAATGTAAGCAAAAAGATTTAAACAAGCACTTCACAAAAGAGGACAT  
TTGAATGGCCAATTAAGCACATGAAAAGATACAACATCATAACTTATCAG  
GGAAAAGCGAATTAATAATACAACAAGATATCACTATACATTTGATGGGGT  
TCAAGATACACTATCCAAAATGTAGTAGCTTGGTAAATTTGAATTTTTTA  
AGCTGAGGGAGGTTGTTTTTTTTAATGGCAGAATCTAGAAGTTCACTCCGA

CCTCCTCCACCTTGCCCTTTCTCCCTGAAAACAGGAGATAAAATATCCCAA  
GTAAAAACACCCCTCCCTATAACCAGAAGAAGGGGGGGGGCATTCTTATCA  
ACAGAGATGGGAAGTTTAGGGCCAAGAAGGCTGTATAAACAAACCTTGTT  
TACTCTTCACTATTTATTTACTACCCATAGCCCAAACCCCTCTGCCTTGT  
CAATTCTTCAAAAATGTGTTGTTTTCTTTGTCTGAAAGGCATAAAATCTTC  
CTGCTATGTTCACTTCTTCAAGTCTTTTATCTTAGTGGGGCTCCCATTA  
CACATATACAGAATTAATTTTTCTCCTGCTAATATGTCTTATGTCACTTT  
AAAAATTAGACTACCCAAAGACAGAGGAGAAGAAGTGGGATATTTCCCCC  
GCCCCCAGCACCCAACTTTAAAAGATTGAAAATACCAGAATATACCTC  
AGTTGAAACGAAAAACTGAAAACAAAATTGCCTAACACACCAGGTGCT  
GCCCTGTTCAAAATCCTTCGATGACTTCCCATGCCTTCAGGATGATGTT  
AGCCCTTCAAGATGACATGCAAAACCCCTCAGGGTAGCACAAAATGTCTGA  
GAGCATACTTTCACTGCCATCCTCACCCCTATCCTATGCTCCAGCAGTA  
CCAAACGTCTTGCTGTCTCCCAATTTGCCATGTATTGCCATATTTTCCC  
CCATGCTGTTTTCTGTGAACAAAGCCATTTTGCCAACTCGCCCATTCCTT  
AAGACCAAATTCCTTCTCCATAAAGCCTTCCATAAGTTGCACATAGCTAA  
ACTTTTGTGTTGAAGAAGAGTCACCTAAATGTTGCTGACTGTCCAGAGGC  
TGCCCTGCCTGGACAGAGATCTCTCCATTTATGAACACACAGGAAGCAT  
GATATGCCATATTTGCGCTATCTTGACATTAGGATAATGTTTTAGACTGA  
CTTTAATCCGCTCCCTGCTGGGTTTAGGAAAGCAAGCTGTTTGCTGCTTT  
CTACTGCCCTCTGTTGAAACAAAGTGGACAATGTGAGTCTCATCTCTAAG  
GACAAAGAGTCAAGTTTTCTTCTTCTTTTTCTGTTTTTGGCTGTACCCAC  
AGCATGTGGAAGTTCCAATGGCAGGAACTGAACCTGGACCACAGCAGTAA  
CCGGAACAGCAGTGACAAAGCTATATTCTTAACATGCCATGCCACAGTG  
GAATTCATTTTTGGGGGGCGGGGGGGGCACAAACCCACCACATGTGGA  
CCTTCCCAGGCCAGGGATTGAACCCAGGCCACAGAAGTGACCGAGGCCAC  
AGCAGTGCAATGCCAGATACTTAACCTCTAGGCCACCAGGGAACTCCACC  
CAGTTTTCAAAAAAATAAATAAATAAATAAATAAATAAATAAATAAATAA  
AAGTGGCTAGCTCATGGGTTAGGGGAGTGAGAGTCAGGTTTCAGGAGCAAG  
AATCTGGGGATGTTCTTTTTTAAGCCACTTGTTCTGCTCTCTGCTTGAG  
TGACTCTTAACCTCAGACAGTAGCATCAAAGTCTCACTTTTCATTCACTTG  
CACTCTGGCTTTAGGCCCTTAGCAGTGAGGACACAATTTGAAGTGGTAGC  
AGAAAAGTAGGAATTAGATTCCAACATCTAGGGTCTGCAATCAAATGGCT  
TAGTACCTCCCCCTCAAGCCTACTTTGTCTTTAACTGAATCAAGTGCAT  
GGTTTCCAGCAAAGGTAAGATTCCAGAAGGGTAAGAACACTATCTTATGC  
TAAATATGCTGAGAATTGCTGGAACTACTTCTGGGGAGGGCTGAAGCTG  
ACCTTCTTAGTAGTAAGCAAATATTTGGTAAGACTATTTGAATAACTATA  
AATGAGGTTCTAAGTGATTCAAATATCTTCTTGTCACTGAAAATAGAC  
CTACCTCAAGGCCTCAGCAAATATAGGAATCACTTCTCTGGCTTCCATTT  
GATTTTCTAAAGCACAGTTTCAAGCTGGAGACCACCTCTCTAGTTCTGGCCC  
ATACCTCTCCTTCCAGGTATCCAGCTCATCCTGACCACGCCCTGGTATG  
TCCCACAGGCACTTCAAACCTCATAATATCCACATCTGAACTTATTTATATC  
TCCCCCTCTATTCCAGCTAAACTTCTCATCATAGGTCCCCTTCAAGTA  
ATAGCACCTCCTAAGCCAGAAATCTAGGTGTCATTGTGGTTTCTTACTG  
TCTTTCCGTTTGGTTTGTGTTTTTGTGTTTTTGGGTCATACCCGCGGCAT  
ATGGGCTTCCCAGGCTAGGGGTCCAATAGGAGCTACAGCTGCCGCGCTAC  
GCCAGAGCCACAGCAATGCCAGATCCAAGCTGCATCTGCGACCTACACCA  
CAGGTACGGCAATGCCAGATCCTTAACCAACTGAGCGAGGCCAGGGATC  
AAACCCATAGTTCTAGTCGGATTCAATTTCCACTGTGCCATGATGGGAAC  
TCCCAGATCTCCTTGTAAATATCTAAACCCCATGACTATTACCTTAGTC  
CCAAGCTGTCTTCACTGCCACCAAGACTATTGCAAGAGCCTAACTTTGT  
CTTTCTGCTCAACTTGTGTTATAAGCTGCAACTAGAACAATCTTCTTTAAG  
TACAAATTAGATTTTTTTACTTTTCTACTTAAAATAATCACTGGTTCCC  
CATGCTTCAGGACAAAGCCCAAACCTCCTTAAGGTGGTCTATAAGGCATTG  
TGGTACAAAGACCCACATATTCCTTTGCAGATTTATCTTGCTACACTACT  
CTCCTTATGTTCAATATCAAACCTCAAACTCAAACTGGGGAAAGGGGGATGC  
CGTTGTGGCACAGTGGAAACAAATGCAACTAGTGTCCATGAGGATGCAAG  
TTCAATCCCTGGCCTGGCTCAGCGGGTCAGGAATCCAGCATTGCCATGAG  
CTGTGGTGTAGGTGGCAGACTGAGTTCAGATCCTGAGTTGCTATGCTGT  
AATGGAAGCTGGCAGCTGTAGCTCCGATTGGACCCCTAGCCTGGGAATGT

GCTGCAAGTGC GGCCCTAAAAAGCAAAAAATAAATAAATAAATAAAGTAGG  
GAAATTTTTTTTGGTCCCAGTGTAGATATTGCCTTCTCTGGGAAGCCTGTG  
CTGGCTTCCCTAAGGTTGAACAGTTTGAGAATGTTTCAGTCATTTCTATCCA  
AATGTGCTTCTGCCTTAAATTTAAGTCTAATCTGAAAAGAAGTATACAT  
GGGGAAAAGTTAATAATATGAAAAAATGGTACAAGCACATCATATTTCT  
TTATAACCTCTTTTATATCTTTTCCAGGGGAGGGGTTCCTAAGGAGGGTT  
AAAAAGTGAAGCTAGGAGTTCCCACTCATGGCTCAGTGGTTAACGAATC  
CAACTAGGAACCATAAGGTTGGGGTTCGAGCCTTGGCCTTGTTCAGTGGG  
TTGAGCATCCGGTGTGGCCGAGAGCTGTGGTGTAGGTCGCAGACGCGGCT  
TAGATCCCCGATTGCTGTGGTTGTGGTATAGGCTGGCAGCTACAGCTCTG  
ATTAATCCCTGGCCTGGGAACCTCCATATGCCCCAGGTGTGGCCCTAGA  
AAAAAAGACAAAAAGACAAATAAATAAATAAATAAATAAATAAAGTGGAAA  
ACTAAATTTCTACAACCTCCACAACCAAAAAATAAGTTACCCAATTTAAA  
AATGGGAAAAGGACTTAAATAGACAATTCTCCAAAAAAGATATAAAAAATG  
GAGTTCTGCGTGGCACAGTAGGTTAAGAGACTACAGCAGCTCTGGTTG  
CTGCAGAAGCATGGGTTCAATCCATATGTCGCTGGTGCAGCCATTA AAAA  
AAATTAAGACCAACAAGTATATTA AAAAGATTTCAACATCACTAGTAATT  
AGGGAAATACAATCAAAACCACAGTGAGGTATTACATCACACCTATTAGG  
ATGATCACTATAGAAAATTAACAAGTGTGGCAACAATGCAGAGAAATTG  
GAACACTTGTGCACTGCTGGTGGGAATGTAATGGTGACACTTTTATAGA  
AACAGTATAGAGGTTCTCAAAAATATTGCTACCATATGATCCAGCAATCT  
TGCTCCTGGGTATATATGCAAAAATAATTCAAAGCAGGATTTTAAGAGATA  
TCTGCACCTCCATGTTTCATTTTCAGCATTATTCACAATAGCCAATATATGG  
AAACAACGCTAATGGCCACTAAAAGATGAATAGATAAAAGAAAAATATGGCA  
TGTATACACAATAGAATAGTATGCAGCCTTTAAAAAGAGGGGAAAATTGGAG  
TACCCACTGTGGTACAATGGGATGGGTGGCATCTCTGGAGTGTGGGACA  
CAAGTTTGTATCCCTGGCCTGGCACAGTGAATTAAGGATCTGGTGTAGGCC  
ACAACCTGCAGTTGGTTCTGATCCCTGGCCTGGGAACCTCCATATGCCAAG  
GGGCAGCCAAAAAATAAAAAAGGGGGGAGAGGAGAATCTTCTCACATGG  
TATACCATGGAGGGTTGAACCTCAAGGACATTATACTAAGCAAAAAAAGC  
CAGTCACAAAAGAACAACCTATTGTATGATTTTCATTCATAGGATATAGCTG  
AAGCAGCCAAAACCATAGAATCAGAAAAATTA AAAAGGTGTTTGCCAAGGAG  
TTCCCATTTGTGGCTCAGTGGGTTAAGAACCTGACATAGTGTCCATAAGGA  
TGCAGGTACAATCCCTGGCCTTGTCTCAGTGGCTTAAGAACCAGTGTTCG  
TGCAAGCTGTGGCATAGGTCACAGATGCGGCTCAGATCCAGTGTTCAT  
GATTTGCGGCATAGACCTGATTTGACCCCTAATCCAGAAACATGCACGTGC  
CACAGGTGCAGCCATTTAAAAA AAAAAAAAAAAGGTGGTTGCCAAAGGCTT  
GGAATAGGGGAGAGGAAGAATTAAGTGTTTAATGGGTATGGACATTCAGTT  
TTGCAGGATGAAAAGTTCTAGAGATCTGCTATACAGCAATTTGAATAGA  
CAACCCTACTGAACTGCACACTTTAAAAATGATTAAGTTAGTAAATTTAAT  
AGGTTTTTACTCACTAAATTTTTTTAAGTAGGGAGCTAAGTGGCAGGAACT  
TGGAGGTATCAATAAGCCCTTTTAATAAGTCAAGTTGTTAGGCAGATAA  
CTCCTCTCAGAAAAACACACAAATACATTTCAGAAGGACCATAGCTATAG  
AAACTAGAAGAATCAAGCTATAGAAAACCCAGAATTC AATAGAACTGAAT  
ATTGATCAAATCTCTGAAGGAATAATGATTTCTAATTTTAGGGGAAAA  
TACAAAGGAAACAACCTCACAAAACCTTTTACAGTCTGAATAATGCAAA  
ACAGATATTGATGCTGGAAGATGTAACCAGAATCCGAGTCTTGTTCAC  
GCAGTCAAAGAATGAACTCCATGAACACACAGGCATCAAGCAAGCAAAGT  
CTATATTACAGAAAAGCAAATAGCTCCCAGGGCTGCTGGGAGGGAGGAGA  
AGAGCCCCACTCTCTATTGTCTTACAGGGGTTTATATCCCTTAAATATG  
GGGAGGTACCAACGTGGGGTCCAGAAAGATGTGGTTTTCTCCA ACTGGCC  
TTGCCCAATTACCTATATTAGTCTTGTCCAATAAGGGTTTTAGGGGTGG  
AAATTTCCATAAGTCTCATAGTTTCTTTGCCCTTTCTTCCATAAACT  
GAGTCACAGGGGATTAGGGATTAATGTCCACCTGGGCATAGGTA CTCCCT  
ATAGTAAACAAGGCCTGTGGGGATGTCACTCCCCAGAGCTCTTAAGCCAC  
AAATGTTAATCAATAGCCATATCAAAGGATGCATCGAAGTCCATGCTCCT  
ATACTGACTACCTGAGTTAATATTCTGCCTCAAAAATCAACCCAAAAATAA  
CAATAGATTGTAAACCGGAAAAAATAATGTTTTTTAATTATGCCTCACCAA  
AAGTGATATTTTTTATTTTACAAGAAAAACATTTGAGTCTGGTAAATAGG  
CAAAGGCAGGAATATCAACAAAGAAATTCAAAAAATTAGGTTAAACAAA  
CAGTAAATGACCAAGTGTGACAGGCACCTGTGCTAAGTGCTTTCCACCTAA

TAGAAATATGAAAGAGGAAATGTGCTAGTAAACAAACACACAGGAAATGT  
TCAGACACACTAGAAACCAAAGAAATGCAAATTTAAATGATGGGACCCCA  
TTTCTCATCTATTAAATTACATAAGTCTAGGAAAAAGAATGTGGTTAAGG  
GGATTCTCACAGATGGAATGTAAACTAAAACAATTGTTTTGGAAGGAAAA  
GTGGAATACTATCAAACGTTAAGAAATATGCATGCCAGAGTTCCCGTCAT  
GGCGCAGTGGTTAATGAATCCGACTAGGAGCCATGAGGTTGCGGGTTCAG  
TCCCTGCCCTTGCTCAGTGGGTTAAGGATCCGGCGTTGCCGTGAGCTGTG  
GTGTAGGTTGCAGACGCGGCTCGGATCCCGTGTGCTGTGGCTCTGGCGT  
AGGCCGGTGGCTGCAGCTCCGATTCGACCCCTAGCCTGGGAACCTCCATA  
TGCCGCGGGAGCGGCCAAAGAAATAGCAACAACAACAAAAAAGAAAA  
AAAGAAATATGCACGCCCTATTACATTGTAATTTCACTTCTGGGAAATATG  
ATGAAATACATACTTAAAAAACACTATTACTCTTTGTGGCACCATTGAA  
AATAATGAAAATTAGAGACAGCCTAACCATGTCCAAAATCTGACTTTAGG  
TAAATTGCTCTGCAACTACATAATCACCTGGAATCTCCCTGAGAGAGGTA  
TATGTATCAGTTAAATGACTTTCTGCAATTAGTACCAGAAAAATCCTCTC  
AGATGGCTTAAACAACAAGAAATATTTTGTATCTCACATAATTTAGTTG  
TCTGAAAATAGGGCAGTTTCAACGTTGGTTAATCTATAACTCAATAATAT  
CACCAGTCACCCAGATTTTTCTCTCTTTGCTTTGCTATTATTTGCATGTG  
AGCCACTTTTCTCATGGAAGCAAAAATCCCTACAGCTGCTCCTGGCATCAC  
ATCCTTAAACACCATCATGTTCAAAGACTGACAGAGAATTCATTACTTCT  
TATGCCTCAGGATCTCCACCCCTGAAAAGTAGATTGCCCTGAGTTTTTG  
TTGACCAGAATTGTATCACTTATTCAGTCTTAAGTCAATCATTGGCCAGG  
GAATTGGTTCTCAAAGTGTGATCTGTAGCGTCAGCATCGTAATCTGTTAG  
AAATACATTTCTGAGGTCCCAACAGAATCGAAAATCTGAGAGTGAGGCC  
ATGGATTTGTATTTTGACAAGCCCTCCAGCTGACTCTGATTTGAGAGTCA  
GAGTCAAATTTGAGAACCACGGACTTAGAGGAACCAAAAGCCACCTCCTG  
GGGTTGTGAAAAGTTCTAGCCTTCTCTAATACTCATGGCCACCGTACATC  
TGAACAAAATCGTGGTCTGTCTGCAAAGAGGAAGGGGAGAAATGGCTGTG  
AGGTAGGCAACCTCTGTATAGGAGAAAAGCCCTTTTCCAGTGCTGATAATG  
AGTCTTTTTAAGGATACAAGAACATCAAAGGAGTAATACTATCTCTTCTT  
TCTACACATTTCTCAAAAATAAATTTTTTTTTTCAATTAAAAAATTTTCATG  
TGTTCAAGCCCCAGCCTGATGCTGTGGGCTAAAAGATCTGACATTGCTTCA  
GCTGTGGCATAAGTTGCAGCTGTGACTCAGATTCTGTCCCTGGCCTGGGA  
ACTTCCATATGCCTCGGGTGCAGCAAAAAAAAAAAAAAAAAAAAAAGGAA  
AATATTGAGTGGTGTGTGCAAAAATGCACCTTCTTTGTGTATGTGAAGTA  
ATTATAAAAAAGCAAGTTGCAGAATAATCGTGAAGGTAATATGTAAATA  
ATAACAAAAGTGAATAAATATAAATATGTAAAAGTAGGTGTGTGCTTATA  
TGGAATATAAATATGTAAAAGTAGGTGTGTGCTTATTTGTATAGGGAAAG  
TTCTGGAAGAACGACAAGCTTTTCAGTGGTTATCCTTGAAGAAGGGAATA  
AAATTTGGGGAGGGAGGTATCATTTTTCATTTTTACTTTTATTTCTTCTGAA  
TTATTTCACTTACTTAGAGAAAAGATATATTATAGAACATGTGTGTATCT  
TCCAACAAAAAATGTTTTAAAGCACCAACGCAAAATACAGGTGAGAGGAA  
CAAGGACTGAATCTCTAGGAATGGTCTGAGCTCTGCTTATATTTCCACC  
GATGAAAGGATAGGACTAATCAATGAAATAAAAACAGAACATTATTTTCCA  
TTTTCTTTTCAAAACTAAGTTTTCTTTTGGTGTACCATTATTTTCTAG  
TAGGTTCTCATTGGTTTGCATGGAAGAGAAAAGCATAAAGTTGGGTTTTGGG  
GGAAGGGGCTGTTTTTGGTTTTTGTTTTGAAGGTTAAAGTTTTATTGGGG  
CAAAATTAGGACTTAGGCTGGGGAGACAGCATCTCAGGTAGCCCTGAGAA  
ACCTCTCCCTCAATTTTTATAATTAACCTTCCAATTCTTAGAGCTATTAAT  
TTTCTAGTTCTGCTAGACAATTCCTTGGACTCCCCGAAATAGCCCAATAG  
CCTTCAATAGGATTTTGCCTTTTAAAATTTTTGCTAATTTTAAAAGGGAA  
AATTTACTAGTTTTTACAATGTCTAGAATTTATAATTGGAAGTCAGCATT  
CAAAACATAGAATAGTTAAGACTGAAAGAAATAGACATAATCTAGCTCAA  
TTACCTCACTTATAGATGAGGCAACAGAGGTTTAGGAAAGAGAAGTGCTT  
CGACAACCTGATCTCTATCAGAATGAAACCAAAAGTTAGATTTCTTCTCCTC  
CTTGACTAGTATCTTTCCATAACACATCACCAACTTAAAATTTTGCAGG  
TTTTGGGGGGAGTCTAAATCCATACTGATGTGAAAATAACAAGATAGGGTAT  
TTATATGTTAATCTAGTAGATAGCATCAAAATTTCTGGATAGCTCTTACAT  
GTTAATGGACTATATTAGTTAATGATCACAGCTAAAGCACAGCCGTGGT  
TTATGGTTACACCACAAAATGTATTTAATTCCTTATAGTTTTCTTCTCTT  
TGAGTCTATCCATCTCTTCATATTTTTGGAGTTGTTCTATCATCTTCACT

GTCGTTCTATGTGTTACATGTCTGTTTCCAGAATTCAGTGTGTGCATCTT  
GTTCTGTGTGCATTTTTCAATCTATGTTTGAGACTCAGTGTACTTCCGAC  
AAGCACCTTTGTCTTTGTTAGTTTTCTCTCTCTCTTTTTTTCTTTTTATG  
GCACGTGTAGTATCTGTGACCTATGCTGCAAGCTGTGGCAATGCCAGATC  
TTTAACCAATGAGCAAGGCCAGGGATCGAACCCACATTTCTATGTACACT  
ATGTCAGGTTCTTAACCTGCTGAGCCTCAATAGGAACTTCAGTFTTCCCT  
CATTTTTTAATGAAAAATCCTCCAGATGATTCCAGCCCCAGCTGTTTGA  
TTTTTCCCAAAGGAAGCTTCAGACACTGTGGAGCAAATAGAAGTCATTCC  
TACCATGCCCCTGAATTCTGACCCATAGAATCCACGAGAATAATAAAATG  
GTGGTTGTATTACATCCTAAGTCTTGGGATGGTTTGTACACAGCAGTCA  
AATAGCTGGAATTCTAGTCTTGGGATGTACCGAAGACAACCAGGCCAGCC  
TGCCCTCTCACAGTCCCTCTCCTGACTGTGTCTTGGATGACCTCACTGAAC  
TTATACCTACCTTCACTTAGTATTTCTCAATCTGACTGGGCTGCTTTG  
GAGGTGCTGCAGGTGGCATAACCTACCTGCACTCCTGCTCAGAACTCCTC  
TCAGCAAGCTAGTCAGAGAGCAGTTGACCTGAATACTACTAGAGAAAATA  
TACCAACACTGAGAATTGGCCTGGCTACAAGTCCATAATCTTCAACCTCT  
GCTGGGCCCTTGGCATGTTTTAGCAATTGATTTACATGCAAACTGTCAGC  
TCCTTCTCCTATCCACCATAATGGCCATTCTAAACCTTCTCTGGTATCCT  
TAAGCCCCACTATCACCTTTACCCCTCTTTCAACAGATGACTGACTCC  
TTCTCCAAGAAAATCAAGGCTATCAGATACAACTACTTCAGCTTTCTAA  
CTCAATATCTGAAAATAAATTTGCATATGCAAATTTCTCACCCCCCTAAT  
TTTAGCTCAGACGGAGCAGTGTTCATATCCAGTTCAGAACCAGGGCTCC  
ACCTGTATCTACTCTTTTGTCTTCAGGATCCACACTTTCTTCCCTCAGTTA  
TCCCCTCCTTGTGCATGCATCCACCTTCTCCCACTCTACTGACTTCTTCCC  
AAAACCTGTAAACAAGTATAAGTCTTTCACTTAAAAAATAATCTCCCTTT  
CTTCCCTTGATCTCCTAGAGTTAATTGTCTTCTGATTTCTTTTTCTTTCT  
GTATCACTGAAGGCCCTTGACTTTAAGCAACTGTATCAGAATCTGGATAT  
ATTTAGGTTTTTTTTTAAAGGAATTTATTGAAAAGAACTGGAGGTGGGTC  
AGCTTATCCCAGTTTGTGTGGTGAAGTGAACCCCAACCCTTCTCCCTTA  
TAAGTGATTAAGTGTACTTATTTAGGATTCAATATCCCAGAAAAGACAA  
AGGCCAAGCCTAGACCACATGCCTGCTCTTTGGCTTTCTATATTTGTCAG  
TTCAGGTTGCCATAACAAAGTACCACAGACTGGGGAAAGTTTAAACCACAG  
AAATTTATTTTCTCACTTTTCTAGGGCTAGAAGTCAGAGATCAAAATGT  
TAACAGTTAGTTTTGTTTTGTTTTGTTTTCCACGGCTCTCTCTTTGGC  
TTGTAGATGGATATCTTCTCCTTGTGTCTTCATATGGTCTTCCCTCTGGG  
CATGTCTTTGTCTTAATGCCCTTTCTTATAGGTATACCAGTAATGTTGG  
ATTAGGGTCCACCTTTTTTAAAAATTTTTTTCATTAATAAATTTAT  
TACACTTACAGTTGTACAATGATCATCATAGCATTTCATCCCAAACCCC  
CAGCATATCCCCCCCACCTCCCAACCTGTCTCCTTCGGAAACCATAAGTT  
TTTTCAAAGTCTGTGAGTCAGTATCTGTTCTGCAAAGAAGTTTCATTGGGT  
CCTTTTTTCAAGCTCCACATGTGAGTATAGCATTGATGTTGGTGTCTC  
ACTCTCTGACTGACTTCACTTAGCATGATAATTTCTAGGTCCATCCATGT  
TGCTAAAAATGCTGTTATTTCACTTCTTTGGTGGCTGAGTAATAATCCA  
TTGTGTATATGTACCACATCTTCTTATGATCCACTCCTCTGGGATTAGGGTC  
CACCTTAATGGCCGCAAGTAAATGACTACTTTAAAGGCCCTGTTCAAAT  
ATGGTTACATTTGAAGTACTAGGGGTTAGGACTTCAACATATAATTTT  
AGAGGAGATATAATTTAACCATAAACAAGTACCCCAAGGTGGGGAAAAGGG  
GGATCTGACTCCTTTGGTTTTCTGTAGTAGAAAAGCTATCACCACTTTCTAC  
TCAGAATACTCACAGTTAAGTTCTGTGCTGACTCAGTGGTTAATGAAAA  
TGACTAGTATCCTCGAGGATGCGGGTTAGATCTCTGGCCTTGCTCAGTGG  
GTTAAGGATCCAGTGTGCCATGAACTGTAGTGTAGGTCACAGACAAGGC  
TCATTTCTGGCATGGCTGTGCCTATGGCATGGGCCTGCAGCTTCAGGAAT  
CAACCCCTGGCACCTCCATATGCCATAGGTCATTAAGGAACGAGTGTGT  
CACTGCTGTGGGGAACCTTTCATATGCTGTGAGTGAGACCAAAAAAGAAA  
AAAAAAAAGAACAAGCAAACAATGAAAAGCAGGAGTATTACTCAGC  
CATAAAAAAGAACAATAATGCCATTTGCAGCAACATGGATGGAAGTAG  
AGATTCTCATACTAAGTGAAGTCAGAAAAGAGAAAAGACAAAATATCATATGA  
TATCACTTATATCTAGAATCTAATGTATGGCACAAAATGAACATTTCCACA  
GAAAAGAACTCATGGACTTGGAGAGGAGACTTGTGGTTGCCAATGGGGGA  
GGGGGAGGGAGTAGGATGGACTGGGAATCTGGAGTTAATAGATGCAAAAT  
ATCGCCTTTGGAATGGATAAGCAATGAGATCCTGCTGTATAGCACTGGAA

ACTATGATGGAGGATAGTGTAGAAAAAGAATGTATATATGTATGTGTGA  
CTGGATCACTTTGCTGTATAGTAGAAAATTGACAGAACTGTAAACAAG  
CTATAATGGAAAATATAAAAATCATTAAAAAATTTTTTTTTTTTTTTTTT  
AGCAGAGGGGAGGGAGTGGATCCTGAATAGCCAAGACAGAGTAATGCTTTC  
ACAACAGAAATTCCTAAAAGGAGTATTAACCTACTAAAACACTTTTTATT  
TCTACTCAATCTTCAACCAAAAATATCAACATTTCTGTTCCCTGACTTCCG  
CCCCTGGAATCGTTCAGGCAAAGGTCATGAACAGCTCCCAGACTGCCACA  
TTGGAGTAATTTCTCGAAATGTTCTACAGCTTTTTTTTTTTTTTGTCTTT  
TAGGGCCACACCCATGGCACCCACAGTTCACACCAATGGCCAGGCATCAA  
ACATGCATCCTTCTCATGGATACTGGTCAGATTCATTTCTGCTGTGCAAC  
AGCAGGAACCTCCTGTAGCATTGTATACTGCTGGCTTCTTGCTCCTTGA  
AGATCCTTCCCTCCCTGGGTTCTCCTGTTCTCTCTCCTTAAGCCCCCTTA  
CCCAATCTCCTTTGTGAGCTACTTTTTCTTCACATACTCTGTCAAAAATG  
CTGAATGCTAAGTTTTGTCAATTAGTCTTCCCTCCTTCCCTCCCCCTCCCC  
TTCCTTTCCCTCACTGTTCCCTTTTTTCTTACTCAATACTCTTATATCA  
GAAAGACTGTATTTGTACTTCATCTTAATATAGGATCTCTGAATGGGCTT  
CATATGGAGCTTCTTAAATTATAAGAAAAATGATGTGTATACATGCATTC  
CCCCCCCCACCCCGGGATAGCATTAAAGCTTTTATCAGAAGTTAAAAC  
ATCAGTCATGTTGGTGTCCCCTATTTAGTTAGATCCTTCTGnnTTTCTT  
TCTTTCTTTTTTTTTTTTTTTTTTCTTTGCTTTTTAGGACCACATTCATGG  
CATATGGAGGTTCCAGGCTAGGGGTGAGAGCTATAGCCACCAGCCTATG  
TCAGAGCCACAGCAAGGAGAAATCCAAGCCATGTCTGCAACCTACACCAC  
ATCTCACCGCAACACGGGATCCTTGACCTGCTGAGCGAGGCTAGGGATAG  
AACCTGAAATCTCATAGTTCCTAGTGGGATTCGTTTCCGCTGAGCCACAT  
CGGGAACCTCCAGATCCTTCTCAGTTTTCAAAGCCATACGTCCAACCTGTTCA  
GTTGACATCTTACCAAAAATCACCACCAACCTCCAACCTCAATAATGGCA  
AAAGCTGAAATCATTATTTCCCCCTCCAGAACTGCTCCTCTTCTTTTA  
TATCTTATGTCCATGAAATGTGTGTCACCATCCTCCTCATTACCCAAATCAG  
AAAGTCCAGCTTCCACTTGACCTTCTCCTCCATCACTCCTCGTAGCCAA  
TCACTCATCCAAATCCTATCCATTCTACCTTTTTTAACATCTCTCCAGAT  
GCCTCCATTGAATTTTCACTTATTCAACTGAGATCTCCTAACTCTCAGCT  
AAACTGTTAAAATAACTTCCAAAAATTTCCCTCTACATTCAGCATCTCTC  
TCTTCTCCAATCTATTTCTTGGATTATGTCATTCCTAGCTTAAAACTTT  
AATGATCAGATTAACATTTTTGnAnnnnnTnTnCnnnnnTTTTTTTTTTTT  
nTTTTATCTTTTCTAGGGCTGCTCCCGCGGCATATGGAGGGTCCCAGGCTA  
GGGGTCGAATCGGAGCTGTAGCTGCCAGCCTACACCACAGCCACAGCAAC  
GCAGGATCCAAGCCACATCTGCGACCTACACCACAGCTCATGGGCAACGC  
CAGATCCTTAACCCACTGAGCAAGGCCAGGGATCCAACCTCGCAACCTCAT  
GGTTCCTAGTCAGATTCATTAACCACTGAGCCATGATGGAAACTCCTGTA  
AAAATTATTCTGATAGTAGTTCAAGAAAATACAACTCTTCAACCATGACA  
TACAAAGTCTTTATGATCACCCAAAAAATTTAATTGAGGGTGTATTCC  
AGGCACTGTGAAATATACTGGAGATACAGTGATGAACAAGAGGAACAGAT  
TTCCTGCCTCTAAGATTTACAGTCCACAAATGTGATGAGTACTGCAAAGG  
AGAAAAACGAGTGCCTAAAGGAGTAAGAGGATGGGAGTGTATAACTTAA  
GTCTGAAAACAACGGTAGACCTCAACTTCCCGTGTGCACTTCTTTTTTT  
TTTTAATGGCCACACCCACAGCATGTGGAAGTTCACAGGCCAGGGATAGAA  
CCCATGCCTCCACAGCnnCCnnnnCCAnTnnnnnCAnnnnCnTTnnnTTT  
TTTTTTTTTTTTTGGTCTTTTTTTGTCTTTTTAGGGCCGCACCCACCGTGTAT  
GGAAGTTCCCTGGCTAGGGGTGCAATCAGAGCTGTAGCTGCCAGCCTACA  
CCACAGCCACAGCAACACCAGATCCAAGCCATGTCTGTGACCTACACCAC  
AGCTCACAGCAACGCAGGATCCTAAACCACTGAGTGAGGCTGGGGATCC  
AACCAGCAACCTTATTGTTCCCTAGTCGGATTCGTTTCTGCTGTGCCATGA  
CGGGAACCTCCACAAGTCAGATTCCTAATCAACTGTCCACAGCAGGAACTC  
CTGCATTGCATTTCTAATAGTCATCAACAGATATGGTTCAGATACACAA  
CCAACAACCTTTGGGTTAGTGCCATTCTTCTTATCCCTATTTTATAGATA  
TGGAACCTGAGGTCTTAGACAGGTTAAGCAACTGGTAGACTTGGAACTCC  
ATCCCAGGCTCATCTGAAACCCAGTCCCCTTAACCTTTAGGAGCTTGTG  
CTTCTCCTTATACTCAGGAATCCTGTGGAGCTATAACCAATCTCTGTAGAC  
ATGCCAGCCGACTTCACTCCAAGTCTTTATTCATGCTGCTCTTTTTGCCT  
GAAATnnnnnnTnCnnTnAnnnnnnTcnnACGCAATTAAGTGTCTCTCT  
CTTCCACATGGACTCTTCTCCGGGAAGAATTAGCCACTACTGCCTTCT

TTGTGCATACACAGAGCTTCACAAACACTTGTAGAGTCCCTATAGCACTT  
CAGATACTTCTCTTGTAGTCTCCCTCTGAGAACTATAAATCCCCAGGGA  
TGATAACTGATCAACCTCTGTAATCTCAGAATCTGTGCTGTAGCTGTCAT  
TGCAAAGTTAGGGAAGAGAAGAAGGGAGGGAGCAAAGAAAAGGATACGGC  
AGAAAAGAATAAGCAAGCATGAAGACAAACACTCCAATATAAGATATGCC  
AAGACCATCTGTCTTCTTTCAAAAAGGTGCATTTTACCTCTCACAGTAC  
AATTAACCCATAACCACCTCCACAACGTTCAATTTGAGGATTTGTCGATAA  
GTGTTTTCATGAAACCCAGGAGAATGTTTTCCACTCTTTTGCAGTCCCTCT  
GCGCTCTCCCTCCTCTTTCTGTCTATCCCATCCACTCTGCAGCTGACAG  
TTCCTTCTCCTCCATGTGAAGGTCACCTGACAGAAAATGGGTCAAGAAGAAA  
TACAACCTTGAAGAAGGAAAATAAAGTGAACGCCTTGTACCATATCGGG  
TGGGAGAAAGAACTTTGGTAAAAAATGAACAACAGAACATGCTGAGTGAT  
AGCCACCTTTACCTCAGAAACCACAGAAAGCCCGGAAGGCACGCTTCT  
GCTTTAGGTGTCCCAGACAAGCACCTGTAGGGCTGTAGCATGGAGCCTGA  
AGTTTTTCAGATGCTACGCTGGATTTTGCAAGATGAAAAATAAATCACTTGC  
GAAGTAGCACTAGAATGGCTGCTTTGTTGGTTTTCTATTGTCCATCCTAAC  
CAGACATCTCATCCAGGAACCTGTGGAGGAGGGGCTGCTGCAGGAACATA  
TGGGGCAGGGGAGGATGGGAATGGGAGAGGAGCAATTAACCTACTCAGG  
AGCAAAATAAAAACAGAAATTAAAAAGTTAAGTGGTTTTTATATGACTCT  
GGAGTGGAAAGGGGTGTGGGTCCACTTGTGCCAGCCCTGCCCTCCACTCT  
ACCTGCCCACTTCTGTCTGCTGCTCACTTCCCTGGGCTTTTTCAAGGCTTT  
TCCAAATGAATCCTGTCTCTGATGTCCAGCAACCTGCTGAGGGCGGGATA  
TGGCCAAGCTGAGCCATTTGACTTTCTGTCTGAGACCTAGACTGATGTGA  
GAATAAAACAAAGTGGGGGTAGGGGTGGGGAGTGTATGGGTATGTATGTTT  
CAGCAGGGGGGATGTAGAGGAAGGAAATTAGCAGTGTCAACCACTTCCCTAA  
CCATTGCACCTCCAACCTTTTCTGGAAAGGAGCCCTGGACCCTGGGCTGCT  
AGGCTCACAGTCAACCCAGGTCAGTCCCTGAGGGGCCAAGCTA  
ACATGAGCTACTGCAGCCAGCATAGCTCCCATACACTGGGGTGAAGGT  
AAAGTGTGGTGTCAACTCACCTGACCCTTTCCCTCCTCTCCAACCTT  
TCTGCATTCTTCCACCTTTCAGTGGTATCTCCTCCTCCAGAGCCCGT  
TTCTCTCCCACTGCCTGTGTTTTCTTTAACAGACGATGCAAATCACATGAT  
TGAATTCATACTAAGAAGTTAGTAGCTCCTGCGGATTACAGATCCCAGGG  
GCATATGCATTTTGAATTTTGAAGAAGAAACATAGATGGAGATAATTTTGG  
GATGAGGGACACCTCTAATGATCTGAAGATTGAAATGACTACTTTCTGTA  
GGCAGACCTGGCTGGATGGAGAAGGGTCTGGGCCAAGCAGGAGAGTGAGC  
AGTTCTGAAGCAGAACAAGAGATTCTTTGAGGAAGGTTCTCCCGCTTGAG  
TCTCATTCCCAGGGTCACATTGTCTTGTTCATGGCACTAGGTGGATCCAA  
ACCCAAGAGGTGGGGGCTCATTTATCAGAGTTCAGATTCAGGAATCAGAT  
GATGTTTTCCCAGAAAGGAAACTGGTGAGTAATAGGCTGGGGGTGGGGGA  
AAGGCTGTTTTACTTCTCTGTTCAAGTCAGTGAAGTCCCTTTAGAGCTCT  
GGATAGCTGTGGTGACGGGTTACAGCTAATGCACAGC**ATGTGGCAGCTGC**  
**TGTCACCAACGGCTCTGCTGCTTCTGGGT**AAGTCAGAATTACCCTGGCTG  
GGAGAGGAGCTCAAGATGCCCTGGGTTACAGCAAAGATCCCTTTTCAGGCC  
AGGAATGAGACCCCTACCAAGGAATAGAAGCCCTGACCGTGTCTATAGAC  
CTAAATTTAGCTCCTAGGACAAAGCTTTGAGGGTTAGAGATGCAGAGGAT  
GCTGGCTCTGATATGGGCATAATCAGGAGGTGAAGGGAGATAGGAGGTCC  
TTGTTACATCACTCCTCTGGGTCTCAGTTTTCTTATCTGTACATTCGAGA  
TTATGGACTACATGGTTTCTACGGTCTGTCTCTTCCGTCTCACATTTCCA  
GTGTTCCCCTCTAAGGCTTTTAATTTCTACCCTTTCCAGGGGACTTGGGT  
TGAGGCTGTTTTCTATGGCTTGATTGAGGGATAGTCGATTTGTACCCTTAA  
TTGGAAAGTTTAAAACAGGACTGAGGAGTAAGGGAATGGTGTGAAAAACA  
GAGGTTTGGGTTATAAAAACAGAGGATGGAGTAGTAAGCACAGACATCAGA  
GACCAAAGGGCAGACAAAGGGAAGATGTCCACTATATTTATCTTGATTC  
TTGGGAACACTGGCCTCCAGGGCAGAGGAGGGCAGAGGAGTTGAAACTC  
ACTATACGTTCCAGCCACCCCAATTTCTATCGCTGCTCAATATTTGTTTC  
ACTCTTTTTTTCTTAC**AGTTTCAGCTGGCACACAAGCTG**TAAGTTTGCT  
TCATGGTCTTGGATTGATCAAATGAGTATGTAAATATATAATCGCAACAG  
GGTGTGAGAAATGTTTTTTGCGCGGGAAACTGCTGATGCAGTTATTAGC  
GAGAGCAGTTCCCCAAAACAGTGGGGCCTGGTCCATGCTTCCCTAACCC  
AATTTTCCACAAGATAAAGAGAGGCCAAGTGTCTCCAGCCAAGATGCTCA  
GACTGAGTCCCATCCTAAGGCTGAGTTGTCAATTTCTGGGTTTGTGATGGG

CTTTGATCCTCCCCAGGAATAAAAAAAAAAGGAATGCCAATGCAGGGCCTG  
CTCATTTCCCTGCCCTTACCTATATTCTCTTGACTCCTCAGAGATCCCC  
CGAAGTCTGTGGTGATCCTAGACCCTCCATGGGACCGGTTGCTTGAGAAG  
GATTCTGTGACTCTGAAGTGCCAGGGGGCTACCTCCTGGAGACGATTC  
CACAGAGTGGAGGTGGAATGGGACCCTCATCTCAAACAAGGCCTCCAGCT  
ACTCAATCACAGATGCTACAGTTGGGAACAGTGGAGAATACACGTGTAAG  
ACAGGCCTCTCTGCACAGAGTGACCATTGCGACTAGAAGTCTACAAGGG  
TGAGTAGGTGAAGGGGAAGGGGAAATTACCAATAAAGGGTGAAACAAGA  
GGCCCTGAAAGATTTGGGAAGAGCCAGAAGATGTTCTTGGGGGTAAAAAT  
TAAGATGAGATGATCTGTAGCTCCAATGAATGATATCAGAATTCAGTCC  
TAGCTACAAGTAGGCCTGAGGTAAAATGTCAAACAGGGTACATACTAGA  
TACAAGGCTGTTGCACCATAACAATTCAGGAAGCAACATTCACAGGGAAT  
ACATATGGCATGAATGGTGTCATCTGAAGGTTAAGGCATGACATAGATGC  
TTGATAACAGTTATTGAATAAAATTAATAAAATCCACTTTGAGGACCTATCT  
CCTCACTCTCATACTCAATGCCCTAAGCAACCCCCCAAGCCATTCTTG  
CGTTTTGTTTTGTTTTGTTTTGTTTTGTTTTGTTTTGTTTTGTTTGGGCGCATATG  
GAGGTTCCCATGCTAGGGATCAAATCAGAGCTGTAGCTGCCAGCCTACGC  
CAGAGCCACAGCAATGCAGGATCCGAGCGACATCTGAGACCTACACCACA  
GCTCACCACAACAACGGATCCTTAACCCACTGAACAAGGCCAGGGATTGA  
ACCTGCATCCTCATGGATGCTAGTCAGATTTGTTAACCCTGAGCCACAA  
TGGGAACTCCCCCTCACCCCATCCCCAAGTCACTCTAATCTAGCATC  
ATATCTATCTCTTTCCGTCAATGCCATATTCACAGGTACACTTCAGCATA  
AATTTGGCAATATGATATCTCTCCTAATAGAGATATATACATGTTTCAGCC  
TGCACATTCAATTGTAATAAGAAAATCTTTGTGTATTAATAGAATCCAGGT  
ATTAGATGCAAGTACAGGAAGTATTTTAGAGACAGACACTCTCCAGGAGT  
CCCTGTAATCACACCACATAGCCTGGTATGTGCAGTGCCATCTTGAAAGC  
CTGGTTCTACTTCCATGGCTGCTCTATCTGTACAGTGTATGTGGGTGGAA  
CAAGCCTGGAGGGGAAGGAAAGCCATAATGAGGGTGGACCTACAACACAAC  
TCCATAGAAATTTGGGCCTTCAAACCTGCTTTCTTGCCCTCTTTGCCTGA  
CTGTGTCACTTAGCCATGGTTCCTCACTCTACAGAGCTACAAAGTGGAACG  
TCTATCATTTAACTAGGTGAGAGATAGTCACTCTGACCAAAATAAAATCA  
GGAATCATCAATAGGAAGCAATAGAAAAATCGAGTCTAGAAGTTATTAGT  
TTTTCTTAAACTTGGCTCCAGAACTGACTTTAGAAGTCTAACCAGTGAG  
AACTGTACTAACTGTGACCAAGGCCATTACTTTCACCAGGCAAACTCCT  
GATCATCCCATGGGACCCATTGCACTTGTTCCTTTTCTGAGAAAGCCATC  
CTTCCTTTTTTTGGGCAGAATTTCTTTGCTGTATTCTCTTTGGTCTGCA  
CGTTTTGTTCTTTCCCTGTTGTAGCATACTACATTGTATTGTAATTA  
TTTTCTAAGTATGTGTGTTTTCTATGTCTAGGCCACAGATTCCTTGATGTTA  
TGGATCATGTGTCTTAGTCATCTGGGTATCCCAGTCTGCACAACACAGT  
GATGGCTCAATAAAATATCTGTTGAATGAATGTACATATAGATATTCATT  
GAGTTCATGACAGCCAGAATGGAGTAAGACTGTTCCCCCAAAGCCACCA  
GAAAATTTGACATATTACATTATATAATATGTAATTATATATAATATATA  
CATGTAACCTCCTGTTAATATTTAAATACATGTTCCATGTTTAGTTTTTTTT  
TCTTTTTGGGTTTTTTTTTTTTTTTTTnGAGnATATATACTTTTTGAAATCT  
GTCTGGTTTTTTTTTTGGCAACCTGCAACTATAGAGTTCCCAAGCCAAAGAT  
CTGAGCCACCTTGCAGCCTATGCTACAGCTGCTGCAACTTAGAATCCTT  
AATCCACTGGGCAGGGCCGCCAGGCTGGGGATCAAACCTATGTCCCAGG  
GCTCCAAAGCTGTTGCCAATCCCCTTGCACTACAGCAGAACTCCTGTAT  
TCTGTCTTTTTTAATTTACATTTGCCCATGAATGTTTTCTTGTGTCAATTT  
TAAAATTTCTCTGTGTCTGGAGTCTGGTAACTTTGCAAGGGAATAGTGAA  
AACAAGTATCTTGGTATATAAAAATTTGTCTGTTAAAGGCTATGCTCGG  
TAATGAAGATGGCTGGTGGAGATGCTGTGGCCCTCAGAAACCACCAATT  
ATGACCTGCTTTTCTTTCCCTCCTTTATTTATTTATTTATTTCTTTTTTTTT  
TnnTTTTTTTTTTTTTnnnnnnTTTGCCATTTCTGGGCGGCTCCCGCGGC  
ATATGGAGGTTCCCAGGCTAGGAGTCGAATCGGAGCTATAGCCGTTGGCC  
TATGCTACAGCCACAGTGGGATCCGAGCCTCGTCTGCGACCTACACCACA  
GCTCATGGCAATGCCGGAGCCTTAACCCATTGAGCAAGGCCAGGGATCGA  
ACCTGCAACCTCATGGTTCCTAGTTAGATTCAATTAACCCTGAGCCACGA  
CAGGAACTCCCCCTCCCTGACTTTTATATGTTCTCCTTCAGGATTTCTGCC  
ACCACTCCTGTGGCCACTCAGTGACCTTCTTCTGACTGGCTATGACAGC  
ATTCCAACATTCTACAAGTGTCTCTTCTGAAGTCTGACTCTCCTTTAAT



TGGGAAAATCATCATTTTTTTTTAATTGAAGTATAGTTGATTTACAATGTT  
GTATTAATTTCTACCATAAAGCAAAGTGATTCAGTTGTATATATATAATT  
GAATATATATGTATGTATATATATGTATATATACATATATTTTTTAATAT  
TCTTTTCCATTATGGTTTATCATAGGATATTGGATACAGTGCTGTACAGT  
AGGACCTTGTTTCATCTATTTAATGTATAATAGCTTATATCTGCTAACCCC  
AACCTTTCATTCCATCCCTCCCTCAACCCCTCACCCCTTAGCAACAACAAA  
GTCTATTCTCCTTGTCCTTGAGTCTGTTTGGTGTCTCATAGATAGGTTCA  
TTTGTGTCATATTTTATTTTTTATTTATGGCTGCACCTGTGGCACGTGGG  
AGTTCACGGGCCAGGGATCAAACCCATGCCGCAGTAGCAACCCAGCCAC  
CACAGTGACAAGGCTGGATCCTTAACCTGATGCTCCACAAGGGAACTCCT  
GTGTCATATTTTAGTTCATCATATAAGTGATATCATATGGTATTTGTCT  
TTTTCTTCCCTTACTTCATTTAGCATGATAATCTCTAATTGCATCCATGTT  
GCTGCAAACATTCATTGTTTTTATGGCTGAATAATATTCCATTGTATAG  
ATGTACCACATCTTCTTTATCCATTCAACTGTTGATGGACCTTCAAGTTG  
TTTCTATGTCTTGGCTATTGTGACTAGTGCTGCCATGAACATAGGGGTGT  
ATGTATCTTTTTGAGCAAATTATCATTTTTCTAATATAACTTTCACCTCT  
CGATCTAGAACTTATAGTGACTCCTTATTACCTGCCATAGCAAATCCAAG  
TGTAGCACTTAGGGATCCTGTAGATTGCTTCTCAACTGCCTCATCACTTA  
ATCCCTCTGCTCTAACCTTCTTTTGTTCATGTGTTCGTGAGTCCCTCTCA  
CTCAACAAAAGTTCTTGATGTGACTTGAATTTCTTTCAGGGCCAGTTG  
CCTTTTTCCCAAAGAAAGCTATGTAAGGAAAAGTCCAGTCTGGCTTTTC  
ATTATGCCCCAGGATCTAGGTAATAATCATCCCTTTTACAAGAGCTTCAC  
ACTGAATGTTGAGGCCTCCTGGACCTGTGGTCTCGTTGTGTCTTTCAGGC  
TGGCTGTTGCTCCAGGCTCCTCGGTGGGTGGTCCAGGAGGGGGAGTCCAT  
TAGGCTGAGGTGCCACACCTGGAAGAACATTACAATACAAAAGGTCCAAT  
ATTTCCAGAATGGCATTGGGAAGAAGTTTTCTCATCAGAATTTGAATAC  
CACATTCCAATGCAACTCAAAGATGGTGGCTCCTACTTCTGCAGAGG  
AATTATCAAGAATTACAATTTGTCTTCGGAGGCTGTGAAAGTCACTGTT  
AAGGTAAAGAGGGTGCACCTAGAGTCTCAGAGGCCTGTGGCGGAGGGGG  
AAGTTTCATCCACACTGGGAAGATGAGTTGGGAGGACATTGTTGACCATT  
CCACAGACTTCTTTACATGGGCCATTCACTCTGCAGCGTGATAGCAGGTG  
CAGAAGCCACATTCCCTCCCCAAAAATATGTTTGTCTTACCTCATTCAA  
ACCATATCCACAATGTTATGTGTCTCTATTATACTGGCTCATCTTTACCT  
GCCCTCTTTTCCCTCCAAGCCTCAAGTCTTAGCCAAGAGCCAGGCTnAC  
AATAGCTCTTCACTTTCTCACAAAAAGAGCCTGGAACCTGAATTCTGGCT  
CTGCTGTTAATTACCTGCATGACCGTGGCCACTTAGTGTCTCTGAACCTC  
AATTTCCACTTCTGTAACAAAGACAAGCAGACATTTATTGGGTAGCTTTC  
AGGATTCTGGACACTGCTAGGTGCTTCTTTACATGTAAGTATTGATGA  
TCATAGTAACCCCTCACAAACATTAAGAGATAGGTAATATTGATTCTA  
CTGATGAGTTAACTGAGGTGGAAAAAAGGGGATAATTAATTTGTACCA  
AGGTCATACTCAAGTTCAAAGCCTGTATATTTAATCAATAGATAAAATGA  
AAnGCTTGGACAGGCGCAATGTCTTGCAGACAGAAATGAATCCCCTAAG  
TACTTTAAAAACATTGCCAGTTTCTGTAGTGCCATCTTTCAGGGTCAGA  
GATCCCCTACTACAGTGCTCCTGGACTTCCAATTTCAAAAACCTCCAC  
CTGCAATCAGACATAAGATGTACATTGTAAGCAATTTACATGTAGTAAGAY  
AGCAAGATAGACACACATCTTTTGGAGACTTTAACAAAAATAATGCCATAAT  
TTGTATAAAAAATAACTTCATGACAATTTAAATTGAAAGTAAATACTCTC  
AAATAGGGAAAGAGAGAGCAAATAATAAAGCAAAGGGGGATACAATGCCA  
ACAGTTAGATAATCTAGGTAACGGGGTCCCATCGTGGCTCAGTGGTTAA  
CGAATCCGACTAGGAACCATGAGGTTGCGGGTTCGGTCCCTGCCCTTGCT  
CAGTGGGTTAACGATCTGGCGTTGCCGTGAGCTGTGGTGTAGGTTGCAGA  
CATGGCTCAGATCCCGCATTGCTGCGACTGTGGTGTAGGCTGGCAACTAC  
AGCTCCGATTTGACCCCTAGCCTGGGACCATATGCCACGGGTGAAGCCCT  
AAAAAGCAAAAAGACCAAAAAAAAAAAAAAAAAANNNNNNNNNNNNNNNNN  
NNNNNNNNNNNNNNNNNNNNNNNNNNNNNNNNNNNNNNNNNNNNNNNN  
NNNNNNNNNNNNNNNNNNNNNNNNNNNNNNNNNNNNNNNNNNNNNNNN  
NNNNNNNNNNNNNNNNNNNNNNNNNNNNNNNNNNNNNNNNNNNNNNNN  
AGTTTATAGTCAGCAACATGGAATGATTTTAAAAATAACAATATTAAGGGC  
TAAGAGGTTGAGAACAACAATTTCTACCTCTTTCCATTTGGGGTTGTTA  
GTTATTGAGCCTCGATAAAGAAATATTATCAATTTTCTGCCAATAAGTAG  
CAAGTTTCAATGGTTCACCTTTTTTTTAGATTTCTTTAATGGGGTGGAAA  
CAATGAGTACAATTTGAAACACAAGGGACAGTTACTGAATTAAGAAAAGT

GTTTTACACCAACTTAnACTTCGACAACCTTCATGATTTACACAAAAAC  
CCAGCTACAACCTAACTTGTTCAACACTCTCAGTCACATACCTCAATCAA  
ACATGAAAACACTTTTTGCTCAGGTAGCACTGAGATCCAGACTCAGTGGAG  
GAAACAATGGCTTTCCATCAGACTTCCCAACTGTTCCCTTAGACCTGTCT  
CTTAGCAGTTGTCAAAAAGACTTTCCACTGATGACCTCACTGTTTATTGC  
AAATTTCTGCCTTAACAGATGTCATTTTATTCTCATCTCTCTGCTTCTCC  
TATTAGGTTCAAAAAGTCCATCACCTATCCCATCATTTCTTTCTACCTTGG  
CACCAAATCATTTTCTGCCTGGTGATGGGATTCCTGTTTGCACTGGACAC  
GGGGCTGTATTTTCTGTGCGGAAAGTACTTCGAAGCTCAAAGGAGGACT  
GGAGGAATGGCAAAGTCACATGGAGCCGGGACCCGAGGACAAAGGAGGA  
TAA)CAAAAAGCAGCAGCATCACACCACCCTGCTTTTATTATCCCATGGA  
GTAATAAAAAGCAGCATCTCTGAA)CCTGTTTGTGTTTTTTGTTTGTGGT  
TTTGTTTCTTTAGGGCCATACCTGGGGCATAATGGAGTTTCTTGCGGAGG  
GGTCAAATCAGAGCTACAGTTGCTGGCCACGCCACAGCCACAGCCACAG  
CCATACGGGATCTTAGTCACATCTTCGGACACACAGCTCATGGCAATGCC  
AGATCCTTAATGCACTGAGCGAGGTGAGGGATCGAACCTCCATCCTCATG  
GATACCAGTCAGATTCATTTTCGGTGAGCCACGACAGGAATTCCTGAACC  
TCTTTCTAAAATCACTACCCATCATCCTCAACAGGCATCTCTGGGAGCA  
GCAGGAAAATTATACCTCTGTGTCTAGGCTGAGGGTCTTTTACCCAGCTC  
TGTTTTCTCTTGGTCTCCTATGGAAAAGAAAGGACTGTGATCTTCAAGTG  
CTAATACTGAAGCCCCAGTAAATAGCTGCATTACCAGGAATAGAAGTGTC  
AGATAAGTAAATAAGAGAAATTATTGTTGTGAGCCAGCTGGATAGTGGTC  
TGCACCTGTTGCTGAAAGGCTGGCTGCCTTCAAGCCACCCTAAAAGTCT  
TCTAGGCAGACCATGGGTATTCTGGAGGTCTAAGGGAGACCACAGAATC  
AATGAAGGAGCTGGCTAAGAAAAGAGCAGGGAAAGTCCAGGATGGACCAGAG  
GAGACCTTCACTGGGCTGTCTTCTAGAACATCAGCCTAGAACATGATA  
GAGGTAAAAGAAAATCACAGAGGTGGTATAGAATTGACTTTTTCAAGGCA  
ACCCCTGTGAGAATTGGGATGGTCTGCAAGTATATGTTAATGAGTATAAA  
ATGGTCCAGGAAAGGATGGGATTGGAGGATTTAGATAAAAAAGCACAAA  
ATAAACCTACTGGAAAGAGAGAAAACATTGCTGTCCAGACTAAGCTCAGT  
GAAAAAAGATACCTCAGCGTCCAAACTGAGAAAGCATGACAAGAAAAAAT  
TCAACC)CAACTGCACAGGAAGGAATGGGCAGGAGCCACAATAGTGAGAA  
TTAGAGCGAGAAGGGG)CAGGGACTATAAAAACCAGCTTCTCTGTTT)CAGTA  
CCTTATT)CAGCACAGCTTTTCTT)CACATCATCCATTA)AACAAAATGTTGGAT  
A)CCCAATATTA)AATGTACTAA)ATCTACTGCGT)TAA)ATATGAA)CTTTG  
AAATCCCTCAATATAT)CAGTTATA)ATGGAGT)GGA)AGTGGAGA)AGGTGATC  
ACTGCTACTGCTTTTGGAGGAA)AGCTTTAGCTGTCTCTCTGTTT)TAGA)G  
CTTTAA)ACAGCTTTCA)ACA)ACATTTCTTGATTCCA)ATACGGC)ATTTT)ACA  
AGATCTT)GCATGCTACTGTTAGACAGA)AGATAGAAAA)CCATGGT)GATA)A  
AACTAGA)ATGATA)AAAA)ATCTTTT)CCTCCC)ATTGTCCAAAA)TCTAT)CAG  
AGATTAGGTT)GATGAGAA)ACCCCTCTCAGCA)ACCATCTCACC)CA)A)CTC  
ATATGA)ATTAGT)CAGCTTGCTA)ATTCACCA)A)ATCTTGCTGGG)ACA)ACTAG  
GCAAA)ACAGA)ACTTT)CACA)AGTAGTATGGG)ATA)AGA)AGGTGA)ATGGG)A)AT  
TAGA)AGCAGTCTTAGAG)CATGCGG)CAGGTATGAGA)AGGCACAGCTGG)AAA  
GAGGCAGGGTCTGGG)CAGAGGTTTAGGGTCTACTTA)ATTTGTGT)CAGTTAT  
GAGCTTCATGCCA)ACA)AGAGTCA)AGCTTGGTGTAGATTGGTATGAG)ATTC  
AGACATGAGACA)AGGGC)ATTTTGGAA)ACATTGA)ACATTCAACT)CA)CATTT  
ATTTAGTATTTACA)ATGTGCTATGCTT)GAGTTTAGGTGCTGA)AGATTTCA  
AGGTGA)ACAGCACAGGGT)CATTT)CCTGGAGGAA)CTTT)CATTCTAGT)GAGG  
GGG)AAAA)AAAA)AA)CA)CA)CATA)AAAA)AAAA)AGAGA)ATGGG)A)AT)CTCT  
TCATGGCTCAGTGGT)TAATGA)ACC)A)AGTAGGATCCATGAGGG)AGTGGGT  
TCCATCCCTGGCCTTGCTCAGTGGGTTA)AGGATCCTGCGTTGCTGTGAGC  
TGTGGTGTAGGTCA)AAAA)ATGCAGATCAGATCC)CACGACGCTGTGGC)GTAG  
GCCTGCAGCTGTAGCTCTGA)ATCGACCCCTAGCCTGGG)A)ACTTCCATATG  
CCGCACCTAAA)AA)AGACA)AAAA)ATA)AAAA)AGATA)ATGA)AGAA)AGAGCTGCA  
GAAAA)A)AGTCTTA)ATTTTTGGTGTCTGGTAA)TGATGAGT)AGG)AGTTGT  
GAGGCA)AAAA)AGG)AAAA)ATGATGA)ACATCCATGGG)CA)A)AGATTCAA)A)AGT  
CAGAGA)AGAGAGGTTAA)AGTTGTTT)GCCAGATCATGAA)AGGCCTTCA)A)AGC  
TAAGG)AGATTGTAGTTTACCCTGCTAGGGCTTGAGG)A)ATTTTAA)GCAGAA  
CCTGTCTTGA)A)AGCTTCTCTGGCAGCTACTTGGAGGCTGGAA)AGAGAGAA)G  
ACAGTGA)A)AGACAGGAA)ACTGCC)CAGAGGGCTAGATGGT)TAT)GCAGTAA

CTTAAGGGCTAAGTAATGAGGAAGTAAATGTCAGCAGGCTGAAGAGGAAG  
ATGATTGTTCAAATATTTAGAAAGTTGGCTCTCCAAAAACCAGCAAGACA  
TAACATGACCAAGGGCCCCAAATTCTGGAACCGCCCTCTCACAAGTTAGG  
AAGTACAAGTACAAAGGCCAGGCAGGTTGAGCAAAAAATTCCTTTTTGGA  
TTATGAGTACTTTCTTTTATCGGTAATACTTCCAAGGCATCCGTTTTCA  
TGATGCGGTTTTTTGTAGATCCTAAAAGAAGAAGTTGTGTCACCAATTGCAG  
CCCTAACCCAGGCAGATCAATTTTTTAAATGCGGAATGGACAATTGAGAAC  
TTCACGGTGTGGCCGGGTTAAACAAAAACGGTTGTTTTTCCCGTCCCT  
GGGTGGGCTCGAACCACCAACCTTTCGGTTAACAGCCGAACGCGCTAACC  
GATTGCGCCACAGAGACAGGCGGGCGTATGTATCTCTGTTTAGTCAGTTC  
ACTGAAGATTAACACTCCTAGTGTCTCATTTCAAAAAACTGGTTGAGGC  
TGGCATGAGAACCGGTGGAGGCAACACCTTCCAACGCATTAGAGAAAGGT  
TAGTAGCCCCGAGGAAAACGGGTCTTTTTTCCCGTCTAGAACCTGCTTAG  
ATCTAGGACAGGACTCGGTTTTCTACCCGGAAGACGTGAAAAACGGAAGCAG  
CAGAGGATGAATGAACTGAGGTACTTTGGGAAAACCCAAAAATGAATGCTGT  
GGGTTCCAGGAGTTCACCTGGTATTGCTCAAAGAAGTACATCGATACACTT  
TTTTGCTGAATTAGACAATTTATGCCTTCAGGTGTATAAGTGCAGTATT  
AACTTATAATAAGCCTATTACTGTGAAAATTTTAAAAATGCCACATCACAT  
GTCCATTTGCCACATGTCTAGCAAAAATGTTATAGCTAAGTAAGGGAGCCT  
AACGACAAAATTAATCTTTACCCCTAGCTGTTTTGAAAGGTTTCTGCTTG  
CATGTGAGGCATCAAAACAGAACAGCGTTTATAAATGCCTGTAATTTAAG  
ATCTTCATGTTGACATAATCCAGATCCAAATATCCAAAGGAGGGCCCTTA  
TCCAACATAATCGACCTAGAGATCCTGGTCAGGGCTGGGCCAAAATAAAGT  
TCTCTTCTCTCCAGTTTGGAGAGAAGCTCTTTATTCCTGGGCCATTTAAT  
AGCCACAGGCTTCTGAGTCACATCACCTCCGCTCCCGGCATACCCAACC  
GTCTAACCCAGGCTGGTTTTTCGCCCCACAAAAACACATAAGCAGTCAC  
TTTTCTGTGTTGCTCAATCCCAGGGCGCCACGGAAGCCTCCCATAGAACC  
TCCATTTTCCCTTGCCTGCCATCCCTTAATAAGTGGGCTCAAGTTTAG  
GTGCAGGTCAAAAATTTTCAATGATTTCCAGTGAATGAGAATACACACAA  
AAATAGATATGCATATGCATAAATATGTGTATGTGTATCTCAGATAAGC  
TTGACAAAATGACCTCTAAGCTGACATTTTTTTTTTACACTTTAAATTTTTGT  
TTTTAAATGTCTTTCTTTTATAAAAAATAATGATGAGGCTGTGATTTTTCT  
ATTAATTTCTAACTTGGCAAAAATAAAAACTGACAGCCTTATATTTGGTCA  
CCAATATTTGGGGGAATTTTTACTTGTCTACAAAGACCAAGTTTGGGAAC  
CACTACTCTCACCTTACCTTCTTTACTGGATTATTAAAAAATAATTTGCA  
AGAGTTGCTGCTGTGGCACAAGGGGATTGGTAGCATCTCTGCAGCTCCAG  
GACAGTTGATAGATCCCTGGCACAGTGGGTTAAAGGATCCAGCTTTGCCG  
CAGAGGCAGCATAGATCACAACCTGATCCCTGGCCCTGGGAACCTCGTAAG  
CCACAGGGTAGCCAAAAGTAACAATAATATTAATAATAATAACTTGCAAG  
TTATTCTAAGTACACATACATTTTTCCATGTTTCTCATGTATACATGTGAG  
CAATCCAAAAGAAAGGAGGAAAAAATAATAAAAAGGAAAACTGAGGCGAAA  
GAAAGTAAAAAATAGGGTGGTGAATAAATCCAAATGTATCAGTAATCA  
CAATAAATATAACTGGAGAAAATGTGCCAGTTTTTTAAAGTACATTTTTAT  
TTTTGTTTAGAAGAATGACATTAACATAAACATGGAGTTCCCTTGCAATC  
AGGTTAAGGATCCAGCCTTGTCACTGCACTGGGTTGCTGCTGTAGTGCGA  
GTTGGAACCCCTGGCCTAGGAACCTTCCACATGCCACAAGCAGGGCCAACAA  
AGAAACAACAAAAAACAGAAAAAGAGAAGAAAAAGATATTTGGTATGTAGCT  
ATATAATAACGAGCAAAAATAAAGTTTATGAAAATAATGTGTCACTAGAGAT  
GAATATGGTCACCATATGTGATAAAAAGATTAAACTTATGATGAACATATA  
ATTCTGAACACAAGTATCTATTAATAACAAAAACAGGAGTTCTGTGCTG  
GGCTCAGTGGTTAATGAAATCTGACTAGGAACCATGAGGCTGAAGGTTCCG  
ATCCCTGGCCTTGTCTCAGCGGATTAAGGATCCGGCGTTGCCGTGAGCTGT  
GGTGTAGATCGCAGACACAGCTCGGATCTCGAGTTGCTGTGGCTCTGGTG  
TAGGCCAGCAGCTACAGCTCCAATTGGACCCCTAGCCTGGGAACCTCCAT  
ATGCCGCGGAAGCGGCGCAAGAAATGGCAAAAAGACAAAACAAAACAAAAC  
AAAAAAAATAGGTCTCTGCACACCTGGCATATTTACCTCAAAAACAGACA  
GTTAAAAATATATCTTGATAACATCTTTATTTTTTATATTATGTTAAAACCC  
AGTTAATCCAAGAAATAAAAAATAATGATAATGCTTTATATTTATGTGACA  
CTTCAGAAATCCAGCCCATAGCACTGATGGTCAACTCTAAGAACTCAA  
CTCTATGTGTGCTGAGTTCCAAGGAGGCCATTGAGTGGCTCCCAACCTGCAGG  
TCTAATTTAAGCCAGCCTACTGCATGTCTGGATAAGGGTCCCTGGCCCT

GTATGTCTCCCAGGACAGGCCTACCTGAACCATGGTCCAATTAACAAGTT  
TCAATATGCACTGCCCCCAAGACAGTGGCTACCCACCCTACTCTGTAC  
CACTCTGTAGTCACTCTTGCTTGTGGGAAGTCAACCTCCACCCAATCAT  
GGCAACAAGAGAGTTAGGAAATAACCAAGAGAGGAGACAGGCAGCAGCAG  
ATCACCATAAAGTCATCAGCCAAGTGTATAGCCTTTGCTGGCACTAGCA  
CTGGAGCATAAGAAAACTGAGGGCTAAAAAAGATGACTGAGGTGCAGT  
TGTACTCTTTTCTCATCCATGTTGTATTTACCTTCATTTCTGGGACAA  
GTTGTTGTTGTTGTTGTTGTTGTTGTTGTTGTTGTTTAAACCCCAATATC  
CTCCCACCATGGGCATGGCTTTAGTAATAAAAGAAATAATTAACACTTGT  
GCATTGCCAGGCACCGTTTTAAACATTTAACTTATTTGGGAATTACAGTT  
ATCATCATTATGTATTTTACAGATGAGGACATTGAGCAGAGAACCAAGAT  
TCAAATACAGAAAGCACAACAGAACCTGTGTGCTTAACCACCAGATTATG  
TTGCCTCATGCAGCCTGAATAGTTGAAGTCAACCTAATTACACACGCCAT  
TCCAATAGATGATTTTTCATATAATAAATAAATAACAGATATATAAAGCCCTC  
AGACAATATTTCAAAGGCTAGGGGAAAAATGTTAATACCGTTTGTGTGTCAG  
TTCCATAGAAGATGAAAAGGGATTGAGTATCATTAACACCATCCTTTCTT  
AATTTTAGGAAAAGTTTCTCTACTTACTGAGCCAGTCACCCAATGACTA  
TCAGTTTATTGGAAAGGAATTGGAGAAATCTGATGCATTTCTCCACATT  
AAACCAGGACTCAGGTAGGTAATTTAGCTAGTGACAGTTGTATCAA  
ACAAAACCAACAGTTTATTTTTGTTTTGTTGCCATTTTTTGGGCTGCTCC  
TGTGGCATATGGAGTTTCTGGGCTGTGGGTCCAATCAGAGCTGCAGCCG  
CAGGGCTACACCAGAGCCACAGCAATGCCAGATCCGAGCAGCAACTGCCA  
CCTACACACCACAGCTCTTGGCAACGCCAGATCCTTAATCCACTGAGCAA  
GGCCAGGGATAGAAGTCCGAACCTCATGGTTTCTAATCGGACTCGTTAAC  
CACTGAGCCACGACGGGAAGTCCAAAACCAACAATTTAAAAATCAACT  
AATTTGGAAACAAGTAAATATGTGACACAGTATTAGCACTATAATGTG  
CAAGACCTGGAAATCAGTTTTATAAGATACATAAACATGCTTATCTACAT  
ATATAAATTAACAATAATTTGAGAATATTTGAAATATATATATTTCTTGTAG  
GTGTTTTAAATCTCAGAATACCATTCTTGTCTATGTGTTTCAACATAAA  
TGAATCCATAAAAAATAATATTTTTGTGGAAAAATGGTAGTTGTAAGTA  
TACCAGGTATATGAACTTTAAAAGTATGAAAATCTAAATAATATATTTAT  
TAATAACTCATGTACCTGTAGTGAAACTTTTAAAAGCTAAAAGGAATAATA  
AATATAAAATCCAAAATAACTTCTTATTGGGAAGGAGAGGGATGCATC  
AAAGAAAGGAACATAGGGGTTTTCTTCTGTTTCATCCTTAAACAGGGTAT  
TGAAATACAGGGATGCTCACTTTATTATTTTACATTTACATTTATGAT  
GTGCTTATTTGTGTAAATTGCTTTCTTAAAATTTAATCTTTATTAATGCT  
TAAGATTTGGGAGGAAAATAATAGCATTTAAGTGGACAATGAGAGAGATG  
CAAAAAGAATCCATGCTCATATTTATGGACCCACACCAGGTCCAGATGGA  
TTACTTAGATTACTTCTCATTTCATAGATGAACACGCAGAGTTCTTAACTG  
CAAACAAGTTAATCTATTCTAGCTTATTTAAAATACAAAATGATGAAGGGCA  
CAGATCATTAATAAGACACTGGGAAAAGTGGAAAAAGCAAAAATCAGGCA  
CTACTTTGAAGGACTCTAGGGCTGCAAAGCGTCTTAAAAGCTGTACTTTT  
GCTCCTCCGCTTTACAGATGCAGAGACAGAGAAGTAAAATGACTTGCACA  
AAAGCAAACGGTTCTTTAGTGTAAAGAAACAAGCAAGCAAAACAAAAATA  
GGTCTTCTGATTGTGACAGCAGTAGCTCATTCTCTGTATCTGGTTTGA  
CATAGCACCTTTGTTTTATTCCCATCACCCGCTGTAGAGGAGTTGTTTC  
ACGAGTTTGCACACCTTCGTGTAGTGTGGCAGTGGCAAGAGTGTGCGCTT  
GAGAATTTAAGCAGGCTCCTGAGCAATATACGCGGGCGGAGGAAAGAAAG  
AGCCGCTAATGAATAATCGATGTGGGAGATAACAAGAAGGAAAGGAATCT  
GGAGTACAGACAGAGCCTAAATCCTTGAGATGCTCTTCCAGTCGGCAGCG  
GGAATTACGGGAATGAGAGAAGATAAACTCAGTGGCAGCTAATTCACAC  
AGCAAATCAAGCAGAACTTGCTTGAAGAATTAAGATCCAACGCAATT  
AACGCAGAACCAGGGTCAAAAATTAGCGCACCTGCTAGCACTATTACCCAC  
CGTACAAGAAAATCATAAGCGAGAGAAATACTCTGGGAGAAAGCTAAAGT  
TGTTTTAAGATTAGTTTTTTGTTTTGAGCCTTAAGAGAGAGCAGTGAACATAG  
TCAAAATGCAGCCTTAAGAGAGAGCCATGAACACAGCCAAAATGCAGCCT  
TAAGAGAGAGAGATGAACATAGCCAAAATGGAGCCTTCACAGAAAAGCCTT  
CATGGCCAAAATGGTGTATAACCTCCCCGTGGGGGAATCGAACCCCGGTC  
TCCCGCGTGACAGGCGGGGATACTCACCCTATACTAACGAGGAAAAGCAA  
CAATGAGTAAGTCAAAATCAGAGCTTAGGAAAGCACTTCTAAGCCGCCAT  
ACTTTTTTTTTTTTTTTTTTTTTTTTTTGAAGCTTGTTCGTTGTTGGCCAACTT

GTATATTTACTGCATCTAAACTGACACATTGCAATCGAAACATAGTAGAA  
AACCTATGCGTAATTTAAATTTTCCAACAGCACATTA AAAAGTAACAATA  
AACAGTGAATCATTTTAATAATATATCTGATTTAACTCAATATTCAAAA  
CGTTATTTCAACATGTAACAACACACAAATATTAATTTTTTTTGTATTTA  
ATCTTCAATCCAGTATTTTACACTTATAGACAACACACTTCATTGGAAAA  
AATTAGTATTGAGAGTTCATGAAATTAACAATTGAAAAAGTAGGTTCCATA  
TAGTATGTGTTTTAAATTTTCGTTGATTTATTTTCAATTCGTTAATTAAC  
TTCAATTTATTAATGTATTAATTTCAATTAATAAGGCTTAAAAACGCAGT  
TCCTCAGACGGTATTAAGTTCCCAATAGCTTATAGCTACCGTATGAATCT  
TGCAGGTATAAAAACCATAGCCCCTTTTCGAGGCTGACAAAAACAGAATCCA  
GAATATCCCAAGATTTCCACAGAGTTGAAAGTTTAAAAAGTAAGGCAGGA  
GGAAAGGTAAGAGAGGAAAGAATAACCTTTAGAACCTAACCCCTCCGAAAT  
GTGGCTGAGCAGAGAAAGAAGCCCGGGGGGTATGAAGGAGCGGTGGAA  
GTAGGTGAGGTGCTGCTGCAGTTTCTAGTTTTCAGTTTCTATTTTCACTCA  
AGCTTTAAAGTTGTTTTGCACACGATATTAATTTCTCGCTGTCTGCAGAA  
CTTGCTTCAGCGGAGGGCGACAAAAACGTAGGCTCTGCGTTGGCCGGGAA  
TCGAACCCGGGTCAACTGCTTGAAGGCAGCTATGCTCACCCTATAACCA  
CCAACGCTGTGCTTAACAAGGTTTGAATCTCTGTATAAAAAATATCAGA  
GGCCACGCATGTACCGATATTTTTTAGTACCATTCTGCATCTAACAGCCC  
AAGCTATACGGAGCATTTTCTCGATGAGAATAAAAACCTTCTGACTACT  
CCTCTTAATCGTCTTAGCCAACGAACGACACGAGGCCAGGGACGCAGAGA  
CCACCGGGAGCCAGAGCTGGAACAGCGCGGAGCCCGGGGGAAATCCAAC  
GCCTAACTCGACCCGGGCATTTATTTACCCTTCTGAAGACTTCTGCTTTC  
CGCGGTCCCAGCAAAGCTGCTGGACGCGCTCAGCACTGGATCCACCGGAT  
ACTGGATTTCGGTAATGGTGATTTGGGGCTAAATATCCGAGGGAGATCGGA  
CGGCAAGGGGCTCCGCCCGGTGTGGCGCCCCGAGAGAAAGAGCGAGAG  
GAGTGCTCGAAGGGGCTGGAAGAAAAGGATCTTTACAGTTTAGGGTAGT  
GAAGAGGTAAGAAGGACTTGAGACAGTTTACTTTTCTGTTTTGC  
GAAGAAGTCCAAGGAAAGTCTAGTTTTATTTAAAACGATGAATAAACAG  
TACAGCCAAAACGATGTGCGACTACAGCACCGTATGATAATCTTAAAGGT  
AAAAAAGAAAAAGTTTTTTGCGTGTGTCAGGATGGCCGAGCGGTCTAAG  
GCGCTGCGTTCAGGTGCGAGTCTCCCCTGGAGGCGTGGGTTCGAATCCCA  
CTTCTGACAAGCTCTTTTTTTCCCAACCATGAGTAGGATTGCATTTGT  
GGAGAAAAGAATATTAATCAACACCTTTCTGTGTGGTATATCCACATATG  
GAGATTTTGTCTCGCTTTGCATATGAAACAATATATTTAGATTTATCCCT  
AACAAACAAAATTTTCTTCTTCTTTAGACTCCAGTTTCTCTGTTTCTATC  
TATTCGGTTATTTGAAAATATATTGAGCCCATTAGGGTAGGTAGATACAA  
AAGACTCCTCTGGACAAGGTGAAACCTCCACCCAGATCCCTTAATTTGT  
TCACGTTCTAGAGTCACATTTTGGCGAGACTCGGATTCCCCACCATCTTG  
CCGGACCCGGTCCCACCACCAATTCTAATTC AATAGGTTTTGCTGTGTAC  
CAAAAACCAGAAAAAGAAATCAATACGGCATATGAATGGAAACTAGTAGA  
AAGGAAAGATAAATTCATGGGGTTGTTTCAAGAACTTTTTCTAAAAACC  
GCAAAGAAACCGCTTTCTGATTTGGGAGCAGCTGGGTATAGAAAAACCTT  
GTCCTTTCTGACGATCTGAATTTGTGAGCGGTCCATAGGGATGAGGATGG  
AAGAATCTGGTTAATGAAAGCTTGCCAACTTCATTCTTTGTTATTTACT  
AGACTATGACCTTGGGAAATGTATTTGACTTTTCTTAGTTTGCTTGTAAAT  
AAAAATGGAGATAGAATTGTTGTGAAGATTAAACTAGACAGCCTAGGAGC  
TTGTTAAAAATACAGATCTCAGGCTACACCTCAAACCTACTGAATCCACA  
TTTTATAAGATTCCAGATAATTCATACACACATTAAGTTTTGAGTTGCA  
CTGGCCTATCTAATTTAGATGTCTTCCCATAGGTCTGTCTTTAACTTGA  
ATCTCCTTTCTTTTGCACATTTTGTCTATATCATTTGAGCACTAACAA  
TACACCAGGCACTGTTGGAAGGGAGGATAAAAAAGTTAAGGTAAATACTGA  
GTCTAAACTAAAAAATAATGATAGTGCATCCATAAGAAAGAAATGTAAAA  
AAAAAAAATAACAACGCTGAACCTTAATCATATGATCAAGGTTAACATT  
ATGAGCAATTAGTCACATTGATATCACATAACCTCCTGATATAATGCAATA  
AGATGGGCACTTCACTCTGTGGTATTCTTTCCCAAACAACACTTCAATCA  
CTAAAAAAAAGCCACAATGAAGGACAATCTAGCAAAATACCTGACGAGT  
ATTCCTCAAAATGTCAAGGCTTTAAAAAAAATCATAAGATTAAGAAGCT  
GTCACAGATTGTAGGGAACACATGATAATTAATGCAACATTTTATCCTG  
GATTGGCTTCTGAAACAGCAAAATAACATTAGTGAGAAGATATGAAATCT  
GAACAAAGTTTACAATTTTGTAAATTGTATTGTACCAATATCAATTTCCC

AGGTTTAAATAAATGTACCGTGTATGTAAGACGTTAACATTAGGGGAAG  
CTGGATGTAGGATATATGGTGACTIONTCTATAGTATCTCTACAATTCTTCT  
GTCAGTCTAAAATTATTGCAAAATAAATAGGCATTTTTAAAAAACTTGTA  
AGTACTTGCCATTAGGAGTAGGAAGTGGGAGTTGGACAAAAAACTGCTG  
TTTTTTTCACTAGAAAGTGTGAAGCAAAATTTGATTTTTGAATAACGGGCA  
TGTATTTTTGATTTAATTTGCTCTAATATTTTGAGAAAATAAATATTTAATT  
TGTTTTATTTATTTTTGGCAGCACTCCAGCATGCAGAATTTCCAGGGCC  
AGGAATCGAAGTTCGGCACAGCAGTGAAAATAAAGGTTAACTGCCAGGT  
CACCAGGGACCTCCTGTTCTAATGTTTTTATTATAAACACACAAAAGCTGT  
GACTACAAAAATCAAACCTAAGACTATATACAATATAATGATATTTAGATG  
CCTATTAACAAGAAATAGTCTCCAAAGAATCTAAACCATCAACAGCAGTC  
ATTTAAAAGTAGATGAAGTGGATTGTTTGTCTAAATTTCTGTAGAAAA  
CAGATACAACATAACACAATGAAATTCTCCCTCTTATAATCTGTGTGTAT  
TTTTGAGGTAGGGAAGGAGAGAGGGAGGCTGTTGAAATGCTAGGAACTAT  
CTAAACCTATAAGTACCATCATTCCAAGTGAAGTTACAAAATAAGTTG  
GGATGGTCAATGTTGGAAGTAAGAAGGAAATTCAGGAAAGGAAAAAGTGTA  
ATATAGAATGTGTATATGACATCACCTCTTTTTCCAGGTTCCTTCAATGT  
GAAGTCAGATTGTACAGGTTTTAGGCCAGGTGCGTGAAAAAGCAGTTAAA  
AATGTGAAATGACAACAGGGTACAAATAGGTAGTTACTACAACCTCCTC  
TTCACCTGTAAGAGATCACCTTAGCAAAATATAATGTAGAATAATGTAT  
TTATTAATTTTTGTATATTTAATACATTATTATATTTATAATGTCAATA  
TAATATAGCACTCTAGCCAAGACCGCTTTCAATTCTGAGATAAAAAATAA  
TCTCCCTTCCCACACAGGAGAGATGTAGAATGGGTGTGTGACTGGGAA  
CTAACTTACACAAATTTATCCTTGCTCTTCATTTAATTGGCAGTAAAGTT  
GAGCCCAAAGATACTTCCCAGTTTTCAACCACTGCTACAAAAAATACATT  
TTCACCTAATGAATAATGTAAATATACAATAAAAAATATTTTTCCACTCA  
GGGCTCATTATCCAAGTGTGTTCTAAAGGAATGATATGTCCAATTTACA  
ATATCTGGGGGAGGCTGTTAATAAGTGGCGTTATGGACTGTTTGTAAAG  
GTGGCAATGCACAGGCTCTAGAATTAGGCCCGATAGGGTCTTAATCCCA  
AATCTCCCCACCACCACCTTTCCAATTTAATACTTATGGATCTTGAGT  
AAATTGTTTAACTTTTTTAGCCTCAGAATCCTCACCTTCAAAAAAGAGAT  
TATACACTGTGATGTTGCTGTGAGGATTAATTAGATGGTATATGTCAAG  
TCTTGGTACACAGCTGACAATTAATAATAATTAGTTATAGCTAATATTTG  
TTGCTCAAATACTATATGCCTATCATTCTTCTTCACTTCTCACATATTTA  
GTTAGTTGTACCCTCTAATAATTCCGAGATACTATCCATCATCACCCC  
CATTATACAAAAGGGGAACTGAAACTCAGAGTTAACTAGTATGATAGA  
TAAAGCTGCAGTGTGAAAACACAAGCCATCTGGTTCCAATATAGCCATT  
TTCCTACACAGTTGCCAGCAGCAGCAGCAGCAGCAGCAGCATCCCATCC  
TAAGGCTCATCAGCAGAAACCAGATGGGACCATGCCATTTCTCTCAAATA  
GATAAGATCAATAAATACTTTAATTATACCACCAGACCTAATCTCTTAGT  
CTTACACATACTTGGGATCGATTATCTAAAAGAACAACGAGTAAAGTCTC  
ATTATTAGAGACAGATAATTAGCATATAAACTCTTTGTCAGTCTATTAGG  
ATGCATAGACTGACACACTAACTAGGCTCCCAATACAGAATTTTTATTT  
TAGGGTTTTGCTAGGACTTAAGTTTCTTACCATTCTCTGTTTTCCAAC  
CACCTCCCCTCCTTTCAACATAATGTCACAATTTCTCTTATCTGATC  
TCACAATTCAACTGTCTCAATGTGCCAGCCTCAAACCTCTTCTCTTAC  
CTTGTTTTCCCTATAGAAATCACACACATAGTCTTGGAATTTCTTCC  
CTTCTTCTTCTCAGCACCCACCCCAACATTTTTCTGCTTCTGAAAAGCCTTG  
CCCCTTCTACTTAAATTGGATAAAATGAAAATAAAGAGTTGTTTTAA  
AAGTTTATTTAGCTCTATTTTACATAACAAAAATCCATACATGCAAGT  
AACAAAATACATTAATGTTAGATGAAAGCAACGTTAAAGTGCCACACAA  
ATGTTTATAAATGGTTACTTCTGCTTGTGTTGAAGTGGGAGAAGATTTTTT  
TTTTAAGTCAAATGACAGATACCTCAGGTATAAAAGATACTGACAAAAA  
ACCCCTATTTAGGGGTAAGATTTCCCTTACTTCCCGACCTGAAGTTAC  
AGGCAGGATCATATAGACAGTCTAGAAAGTCCACAAGCTCAGACCAAGTG  
GGAGAAGATTTTTTTTTAAGTCAAATGACAGATACCTCAGGTATAAGAT  
ACTGACAAAAAAAACCTCTCTATTTAGGGGTAAGATTCCCTTACT  
CCCACACCTGAAGTTACAGAAAGTCCACAAGCTCAGACCTTACAGTACA  
GCTGACTTGTGAGGAGGGCCATTTAATCAACCTCTCAATGACAGGGCC  
AGTACTGGGGGCTCCCTGTGAGCTTGTGACACCACAACCTGCTACCCCG  
GGATAACCAGAGCCCCATAGAGCCTGGAGAAGATGGGACGACAAATCTGC

TCCAGTTCCCTCTTCTGATGCTCATACTCCTCTTTCTCCGCCAACTGGTT  
GTGCTCCAGCCAAGTAAGGACTTCCTGACACTTGTCTTGTACTTTGCACC  
TGTCTCTTTCAGGAATCTTGTCTCTAAGGCTTTCCCTCGTGCAAGGAGCCC  
TTCACATGGAAAACATAGGCCTCCAGGGAGTTTTTGGCAGCCACCCGGTC  
CCTCTGGGCCTCATCTCAACCTTGTACTGCTCCGCCTCACGAACCATCC  
TCTCCACCTCTTCCCTTGTCTCAGCCGGCCCTTGTCAATTGGTGATAGTGATC  
TTGTTAGCTCTGCCTGTGCTCCTGTGCTCAGTGGCTGTCACACTCAGGATGCC  
ATTGGCATCAATGTGCAAGGTCACCTCAATCTGGGGCACTCCACGTGGGG  
CAGGAGGTATGCCACTGAGCTCAAAGCGCCCCAGAAGGTTGTTGTCCCTG  
GTCATGGCCCTCTCACCTCATAACCTGGATCAGGACTCCAGGTTGGTT  
GTCTGAATAAGTAGTGAAAGTCTGGGTCTGCTTTGTAGGGATGGTGGCAT  
TCCTCTGGATTAGCGTGGTCATCACCCCCCAGCTGTCTCCAGCCCCAGG  
GACAGGGGAGCCACATCCAGCAGCAGGAGATCCTGCACCTTCTCACACTT  
GTCCCCATCAACACTGCTGCCTGCACAGCAGCACCATAGGCCACAGCCT  
CATCTGGGTTGATGCTCTTGTTCAGTTCCTGGCCATTGAAGAAGTCTGC  
AGAAGCTTCTGTATCTTGGGGATGCGGGTAGAGCCACCCACTAGGACAAT  
ATCATGGATCTGAGCCTTGTCCAGCTTGGCATCCCGCAGGGCTTTCTCCA  
CTGGCTCCAGGGTGTGCGGAAGAGGTCTGAGCACAGTTCCTCAAAGCGG  
GCTCGAGTGATAGAAGTGTAGAAGTCTACACCTCAAAGAGGGAGTCGAT  
TTCCAGCGTGGCCTGGGTGCTGGAAGACAGGGTGCCTTTGGCGCGCTCAC  
AGGCGGTGCGGAGCCTGCGCAGGGCCCGTTTGTTCCTGCTTAAGTCTTC  
CTGTGCTTCCGTCGAAACTCCTCCATGAAGTGGTTTACCAAACGGTTGTC  
GAAGTCTCTCCACCCAGGTGAGTGTCTCCAGCCGTGGCCTTACCTCAA  
AGACACCTGCGTCAATAGTAAGGACCGACACGTGCAAGGTTCTCCACCC  
AAGTCGAAAATGAGCACGTTCCGCTCACCAGCGCCCCCTCCGGTCCAGGCC  
ATAGGCGATGGCAGCAGCTGTGGGCTCATTAAATGATCCTCAGCACGTTGA  
GCCCTGCAATGGCACCTGCGTCTTGGTGGCCTGACGCTGAGAGTCGTTG  
AAGTAGGCAGGCACGCTGATCACAGCGTGCCTCACGGGCTGGCCAGGTA  
CGCCTCCGAGTCTCCTTCAATCTTGTCTGAGCACCATGGACGAAATCTCCT  
CCGGGTAGAACGCTTGTCTCCCCACGGTAGGAAACGCGCACCTTGGGC  
TTCCACCCCTCGCTCACACCTGGAAAGGCCAGTGTCTCAAGTCTGACTG  
CACGGTGGGGTCTGCAAACCTTGCGCCAATTAGCCGCTTGGCGTCAAACA  
CGGTATTCTGCGGATTAGGGCCGCTGGCTCTTGGCTGCATCGCTACC  
AGCCGCTCGGTGTGCGTGAAGGCCACGTAGCTGGGGTGGTGCGGTTGCC  
CTGGTCATTTGCTAGGATCTCCACCCGACCGTGTGGAACACACCCACGC  
AGGAGTATGTGGTACCCAAGTCGATGCCTATGGCCACTTCTCTTGCAGCG  
GACATGGCTGTGGCTTCTGTCCACGAATGCAATATGAAGGCAGATGCACC  
AGCTTTCGGAATTTAGTGCTTCTCAACGTTGGAGGTACGCTCAGCACTGC  
CACTCTTGCCTCCACCCAGCTCGGATCTGCTCTCCCTCCCTTCCAGGAG  
CTTTTTATCCAGTTGCGGAAGACCCGCTCCTCCCGCCCCGCAACCGTG  
AACCTTCCAGCGCCTTCCGGGCGAGCCTAGAGCCGCCAGCCCGCCGCT  
CTGGCTGACTCGGAAGAAGGTTCCGGGCGGATCGTCTGTTCAAGGAAGGG  
TGGCCTCACCTGCGTCTGACTCAGAGCCACAGAGAAAGTTCCAGCTTCTC  
CCAGCTGGTTCTAAAGGCCATCGGTGGGGCAGAAGTCAGGTAGGGCAGTA  
ACTTCTCAAAGAACACCCCTCCTGGGTTGAAGAAGGCAGGTCTGAGTCCG  
GCACCTCCAGAAAAGCCCAAAGAAAATGTCACCATGGGAAGAGAGCCATG  
GCCTCAAGGCCAAAGATTTAAATTTCTTAATCCTTAATATTTGCAGGGGA  
GGGGGTTCTTGAACATAAAAGGCAGTATTATCAAAATTTATGACTGAGAAG  
AACAGCTAGGAAGGGACCTAGGGCTAGGGATGATGTTAAGAGATCATGCT  
GCAGGCAGCTCTTCTACAAGATGCATTGGTGGTTCAGTGGTAGAATTCTC  
GCCTGCCACGCGGGAGGCCCGGTTTCGATTCCCGCCAATGCACAAGGTT  
GTCTTTTCTTTCAGCAGCTTCAGTGATTTTAAAAAAGCTTTGTTTTGTTT  
TTCCCTACTAGGATTTGTGACAATGACATAAATAAAAACAGTTAAAGGC  
TGGGTTCTTCTGGTTTTCTCTCCTTTATCAAGTGGCAGCCAGAAAGGAG  
CCAGAACCTGGAGCTGTGGCTTGGGAACAGCCTAGGAGGAAGGAAAATGC  
AGGTGAACGTGGTGAAGAATGTCCCTTCTCTTATCCAGCCCTGCGGGCT  
CATATCTCCTGGGAGCATAGTACCAAGGGATGAGTTGGAAAAGGCATAGTG  
TGTGTTTTCTTCTGAGGCCTGGACGGGTTCACAGCTCAAACCCAGAACT  
CAGGTGTGCAATAAATGCCTGGAGTACAAGGCATCCTGTGCCCAAAGGC  
CAAGGGCCAAGATGATTTCACTGGTCAATAAAGCCACATTTGATCCCATC  
AGATCTATGGCATTGCAAACCTGAGTCTTTGCCTTGTCTCACTTTCTTTAA

TCCAGAAGATCTCATTAAATATTTTTGGTGTTCCTTTGGCATGGACTT  
CTAAGATACCGAAAGGAGAAGACTTTTTGGAGACACGAGGGTGGAAATGG  
AGGAAAGAGAAGCCAGTGTGTCTGTAATCTCCTTCTGGGAAATGGAAC  
CTGGTTTTCCACATGACAGACAAGTACGGTCACTACTAGACTAAGAGGAT  
AGTACCCAGGAAAACATGATACATTCTAATGTTAAACTCTAGTAGCTTCA  
ACTTTTTATGTACTATATTATTATTCATCTGATTCAATGAAACTACTAGTT  
TTTTAAAAGCAAACTTAAAAACCTTTACTCTGAGTAAAGTGGCTCCTTT  
CTCCTCAGGTGGCTTAGAACTCTTTGGAACACTTCAGGGCCTGAAGAGGG  
AGAAGGAATCAGGATGCAGGTATCAATCCCACTTCTGGACTGGGTTTCTG  
GGCCAGCCCTTTCCAGTGTATTGATGAGAAAGAGCTGACAAAAGTTTGCT  
GCTAGTGAGCTCAGCTATACTAAGAAGGTGATCAGTCCATGAAATAAGGG  
AATGTTTGAAGAAGCTGTGCAATTAATTACTTCCACAGTGAAAAAGCAAAT  
CATCCTCAAAAAGGAGCCTATTTTTATAACTCCAGGAGGGAGAAAAAGCTGT  
CAGCTTTAAATTCATTCACTCTCAGAGTTTAGGCTGGCTAGGCCTACATG  
TCAAAGTCAGGACATTTTAGGCAAAGGCCTGCAAGAAAAAGATCCTTATT  
TCAGAAAGGAAAACATGGCCTGCCCTGAGGTCTGTTGAGGAACTGCCTTG  
TCCAAACTCCTCTAACCTTCTCTCCAGCCCTCAGCAGCCGAAAACCCC  
ACCTGCACACCTACCCCCAAGAGTTTCAGGTATAGCCCTAAAGCAAGCAC  
CTCCATACCTGGACAGAGCCTCACACACACATTTCCAGTGTCACTCACTT  
TATTTTTTTAACTCAAAAGAGTTCAAATATAGGGAAGCTTATTTATGCAAT  
GCAAACCTTTATAATACACTTAAGCATATCCACTTATGTGAAACATATAAA  
TTTTGAGTGTCTTTCAAAGTAGAACAGTGAGAGTTCCCAATGTGGCTCAGT  
GGTAAGGAACCCAACTATCTATGAGGATGCGGGTTAGATCCCTGACCTCG  
CTCAGTGGGGTTAAGGATCTGGCATTGCCAAGAGCTGCGGTGTAGGTTCG  
GGGCAAGGCTGGGATCCCATGTTGCTATGGCTGTGGTGGCTGGCAGCTAC  
AGCTCCGATTCGACCCCTAGCCTGGGAATTTCCATATGCAGTGGGTGTGG  
CCCTAAAAAGACAAATTAATAAAGAAGTGTAGAACAATGATGACTTAAAT  
AGAGATTGTGGAGAGATGCTCTTGACCTAAAACCTGAGTACAAAAAGCAAG  
TTGAACAAAATGTATAGTATGATCCAAAACAATATGTAAAGGTCTATGAT  
ACCAATTACGTGTACATCTTTGAACATCCTTAAAACCATCTGGGCCACAG  
CTTTCTCAATTTTTATTTTTATTTTTATTTTTCAACCATGCCACAGCAT  
GAGGAAATTCCTGGGCCAGGGGTGAAACCTAAAAACAGAAAGTGACCCAA  
GCCACAGCAGTGGACACCACATCCTTAACCTGCTGAGCCACTGGGGAAC  
CCTGAGCTTTCTCAGTTTTAAAATGAGGAGATTGAATTTACCATTTTTTA  
AGTCTTTGTAGCGTCAAAAGTTTCTGATTTCTCATGAGCAAAAGAGGATT  
CCTGTGTCTCCTAAACTATGTACCTATGCTATACTGAATGAACCTGCC  
CCTTTTTTTTTTTTTTTTATTGGCAACACCAACAGCATAACGAGGTTCTGGG  
GCCAGGGATTGAATCTGGGCCACAGCTGCAGACCTGCACCAGGTCACATC  
CTTTAACCCACTATGCTGGGCAGGGGATTGAACCCATGCCTCTGAAGCAA  
CCCAAACCTGCTGCAGGCAGATCTTTATTTTTTTTTTTTTTTTCCCCTCTGT  
CGTTTTTGGTTTTTTTTAGGGCTGCACCTGCGGCATATGGAGGTTCCCAGGC  
TAGGGGTCTAATCAGAGCTGCAGCCTCCAGCCTGCACCACAGCCACAGCA  
ATGCCAGATCCGAGCTGTGTCTGCAGTCTACACCACAGCTCACGACAACC  
CCTGATCCTTAACCCACAGAGGGAGGCAAGGGATTGAGCCCGCAACCTCA  
TGTTTCCTGGTCCGATTCTTTCTGCTGCACCACTACGGGAAATCCTGCA  
GCTGATTCCTTAACCCACTGCACCATAGCAGGAACCTCTAAATTTCTGCTT  
CTGTTAAGCATAAAGAGAAGTGATATGCTGTGTTTGTTCGGAAAGTGCCATA  
TTTTATTTTTATTCATTTTTTTGCTCCTCACACTGGTACAATAAGGAATGTTA  
GTGTGATAGACATTGATGATGCTAACCAATATGTATGATTCTCCTCCTTC  
TAGCCTCAGAAAGGGTTTTGCAATTCCTGCCTCTTGAGATCAGGTCATAT  
GACTTGTTTGGCAATGAAATTTAAATATGTTACTTCTGGACAGAGGGCA  
TTTTAATTAATCTTAATTGCTACTGTTGTCTTTGACTTCTTTGGCAATG  
TATGGTAGCTAGTACTGAAATGGACATATAAACCTGAGCCAGCCATGAA  
AGACAGCTTCCTTGGGACTCTTCAGATATACAGCAGAAAATGAGAAATA  
AACTTCTGATGTTTTATGCCACCAAGATTTTTTTTTTTTTTTTTTTTTTTT  
TTTTTTTTTTGCTTTTTTAGGGCAGCACCTGCAGCACATGGAGGTTCCCAGG  
CTAGGGGTCAAATCAGAGCTACAGCTGCCGGCCACAGCCACAGCCACAGC  
AATGCTGGATCCAAGCTGCATCTGAGACCTACACCACAGCTCATGGCAAA  
CCCACAACCTCATGGTTCCGAGTCAGATTTCGTTTCTGCTGCACTACACCA  
GGAACCTCAAGATTGTATTTTTATGATCTGTGAGTTAATATGCAGGTTA  
GAGCTGGTCAAGTAGGATTATCACCCATTTTTTTTCCAATGTGACTAGCC



ACAAAAATGTAATTCACACTCAGTTCTACCTTCTAGTCCATCCCTACTCCAA  
CTTACACCTCCCTACCTTTTTTTTTCAGTTACTATAGTAAAAACAGTCTTAT  
CTGTTTTAAGGGGAAAGTGCCAGCCAAATAGTGTGCTCCAAAGACTACAGT  
TTCCATAAACATTTATTAAATACCTATTATGTTCCAATGACATTATGTTT  
CCATGTATGTTGTTAAACTTTAACCTCAACAAGATATCCCTGGGGAGAGA  
GAAAGATATTACCATTTACAGAAAGAATAAATTCACAGAGTAGTTA  
AATTCTTCAAGACCAATCAGCTAGCATATGGTAGAAATGAAACACAAAT  
CAGGTTGTTTGGCTCTATTTTTCAGTATACTTTTACAATGCTACTCTATA  
GGCTTAGAAAGTTAATTAATTAAGGGAAGCAAGTCCAAGTACTGATATACT  
ACTTTAAAAGATGTGATGGGTGAAAGTAAATTAATTAAGAGTTTAGGC  
AAATACATTCAAAGTCAAGTGAATGCATGTACCAGTGGTATATCTTGGATGGT  
ATCTAACAGGGTGTTCAGTAATATTGAATTGGATTCTGCTTCTGGGAAG  
ATGGAGTAGATGTGCCTTTTTTAAAAAGTATTTGATTTCAAATTAAGGA  
ATTTACTCACACCGCAAATAGGTATTGTATGCTTTGTATGTACCAGATG  
CTGACCTTGACTCTAACTGTATGGTAGTGAACAAAACGGAAAAAAGCAC  
TGGATCCTGGAGCTCATATTCTAATGGGAGAGGGGATAGTCAGTTGGTAA  
TAAGTACAATGGGTAAAAATACATCAATAAACAATTAACAATTTGGGCAT  
ATGGTACTTCAGCTGGTGTATGAGTACAATGGGGAAAAAATCAAGCAAGA  
GAGGGAGATTAGGAGATAGTGGAGGAGTGGTGTGTATTGAATGGTCAAG  
GAGACCTCACTGATAAGGTGATATTTGAGTAAAGACCATGCTGAAGCACA  
GTGTGGATATCTGTAAGAAAGAACATTTTCAGGAGTTCCTCGTGGCGCA  
GTGGTTAACGAATCTGACTAGGAACCATGAGGTTGCGGGTTCCGGTCCCTG  
CCCTTGCTCAGTGGGTTAACGATCCGGCGTTGCCGTGAGCTGTGGTGTAG  
GTTGCAGACGCGGCTCGGATCCAGCATTGCTGTGGCTCTGGCGTAGGCCG  
GTGGCTACAGCTCTGATTAGACCTTAGCCTGGGAACCTCCATATGCCGC  
GGGGGCGGCCCAAGAGATAGCAACAACATCAACAACAAAAGACAAAAAAA  
AAAAAAAAGAACATTTTCAGAAACAGTAAATAATATAAACCTGGAGCAGA  
AGAATAATTGAAGTATTCAAGGAAGCAAAGAAGAGCAGTAGATGAGGTCA  
GAGAGGCAGTGAGGAAGAAGATCATGTAGTGCTTGTAGCAAAGGCTTTA  
GCTCTTACTCTAAGTACAAGAGGGAAGCTATTGTATAGCTTTGAGCAAAG  
AAGTGACAGGTGCAATGCACATTTTTTAAAAAGATCACTTTAGCTGTTTTGT  
TGAGACTAGACTGTCAGGTGGCATGAGTGAATGCAGGGAGACCAGTCAGG  
AGGCTGTGGAAGTGAGAGATGATGGTAGCTTGGACCAAGGTGCCAGTAGT  
AGAGTACTGAGAAGTTGTGAGATTGTTGGATTTATTTTGGAAAGTAGAGCA  
GGGTTTACTGAGGTTTCATATATTTGAGGAGCCTCTGTCAAACATCTATG  
AAAACACATTTGCTGTGAGTCTTTGAAGAGCTGGGTGGGTTGTGACTGTA  
CCTTGGCCTTCAGGAAATCAGTAAAGGTAAGACCTGTTAGGATTTAGCTC  
TGAAGATCACAGGCCCTTTCCCTTCCCTTGGAGGGTCCCTTGGCCCAAGTTGC  
TGTTAAGTCGGGGCTGGGGGAAGAGTTACAGACTGAAGAGATGCTGCTAC  
CACAGCTGTTACACCATGGAATGAGCGA **TCATTTGTCC**TGAGGGCCTTGA  
**CTCCATCTGACTTTGCTGTTCTTCCACTCTCCCTTTGAGCATTGAAGGTC**  
**TCTCTGGACAGAAAAATACAGCCCTGTATCCACTGCAAAAAGGAGCCCCA**  
**TCGCCAGGTAGAAAGTTATTTGATACCAAGGTGGAAAAGATGAATAGAAAT**  
**GCCGGACCT**AATAGGAGAGGCAGAAGGATGGGAAAATGACACTTGTTAAG  
GCAGAAATTTAGAATAAACAATCAGGTCCCTAGTGAGAAGCTTTTGAGAA  
GGCTGAGGCCAAGGCCAAGACAGACAGGTAGCCCAGAAAGGATTCAGAGG  
ATCTTTTCCCTCTCCCTGCCTTCCCAATAATGCACTGGGTGAGCATTTCC  
CAAAGGATAACCTCAGGAGCACATCTGTTCTTTAGGACATTAACAGAAGT  
TATAGAGAAAAAAGATTTTATAGCTACCAGGTTTAGCAAATGCCTTGTA  
CACTTCATTTAAGAGTTTTCTTTAAGACAGGGCTTCTTGAGGACTTTAAT  
GTACATTATGAATATAAAAAGGAAAGGAACAGAGTGCATAGCATGTTCTGC  
ATTGATTTGACCACAGAACCCTCATTCTGAAACATCTCTCTGGGAGTTA  
TGTGATTTGGGAAACAGCCTTTGGAAAACGTTGAACTAGAGAATCCATAGA  
CCACATCAACAGATTTTCACTCACACCTCCTTTTAGCCTGAGACCAGGT  
ATTCACTAACCCACTCTAGTCTGGCATAAATGCTTGTGATGCCATCTGAA  
AGGGCATGATTTGGAATTCACAAGGCACAACCTTCTCAAGAAAAGGCAGAG  
GCCTAGTTATTTGTATGTGCAGAGGGAGTCTCATGCCAACATGGCTCCTT  
TGGCTAAGATTTGAGCCCAGCCTGAGCAGTTCACTAGGGAGACACAAGCA  
AGCATTAGACTCCTAGAGGGACATATGATAAAGTACATGGAATGAGGTGG  
GAAAGAGGGGAGAATGGTGGATTTCCCTACTGGCTCAGTGGATTAAGGATC  
CAACATTGTCAGTGTGGCTCTAATAACTGCTGTGACATGAGTTTGAT

CCCTGGCCAAGGAACCTAAGCCCCAGCCCTCCCCCTGAAAAAGAGGGAGAA  
TAACAATATCTGGAAGATGGATATGGAGGATAAAAAGGTGGTTTCTGTCC  
CTTAAGAGTTAAACTCCAAGTGAATGACACCCATCCCTATAATCCCTGA  
GAAATTATCCAGGACAGAGCTGTGTATTCACACAGCAGTTGGGTCAAAC  
AAATATCCTGAATTCAAAAAAGATTAATAATCCCTCACTACCCATCTT  
TCCAAGGTGTAAAGCTCCATGAAAAGACTTAGTTCCCACTTGGACAGTG  
ATGTTACACAGGCTGTGATGAGTATGACGTCTTCCCAATTGATCCTGTGCA  
GTGGTACTCACCCTATGACTGTGGTTTTGCATGTGGGATGGAGAGGCTGG  
ACTCCACATAGGAAAATTTCTTAGATTTTCCATTCTGGAAAAATACGACC  
TTATGCAGAGGCTTGTTCCTCCAGCTATGGCACCTCAGCACAATGGGCTC  
CCCTTCCCTGGAACACCAGGCTAGGGGTCTGGAGCAGCAGCCAGTCTGAAA  
GACACAAAGGGACCACAGGACCCAGGAGGCCTGACTCAAATCTTAGACCA  
AATCCTTACTGGTGGTACATTAGATGTGGAGAGGAGCCTACGTTTGGAA  
CAGACATTCCTGATCTGAATCTTGGCAAGTAATTTAATTCTTCTGGACCT  
CGGTTTTCTCATGTGAAAATGGTCACAGTCATACCATTACCAATCTAGAG  
TAGTTCTACCACCTACTATGGCATATAGTAGGTATTCAGGACATGCTTGT  
CTTCTAATTCCTGTCTGGAATAAGCCAGCTGCAGTTCTGTCTGTCCAA  
CAAACCTCCACAGGAAGGGCATAAGAGACCCCTGGTACCATCCCTTCCCTA  
AAGGAGGAATCAACTCTGACACAGGAGACAACAGGTGAGGGGGACACAGC  
AGAGACATACATCTTTGGGGAAATGTGTGAACATCCAACAAAATATTAGCT  
TATTTGGTGCATATTAGTAAACGTGGAATTTCAATTTAGCAAGGACTTTA  
TCCAAAGGCAGCAGTGATATGGGTGGACTGCTAGCCTGCTGTGTATATTT  
CCCTCCCATTTTACATCCTTTTACAGAGGAAGAAAAAATATGTAATTTTT  
TGTTGTAAGGAATAGAAGATGAGGTGGGTACTTGTAACTCTGACCTCA  
GCCCACACACTCCTTTTTCTAAAGCTGTAGGATTGAGCAGAGTTGGAAT  
TGTAAGAAAGGGTAGAAAACAACAGATACATTGGAAGGGAGTCCCTCCA  
GATGAGGAAAAATAGAAAACAATAACCACATGTATGCCATCAAACACACTT  
AGTCCCTGCACGAGATCAGAATGATGCCAACAGAAGTCTCCACACAGATG  
AGGGAATAAGTGACAACAAGAGAAAGCTCTGGGCCACAGCTACAGTGGG  
ACAATCCAGAGGAAAGCTGGGGACACCAGATCTTGCTACTTGTGTACA  
GGAGCTAGAAAACCCCACTTCTCCCACTGGGAAGGAACCCCTCTGTCCCA  
GCCATTTCTTCCCTATCATCCTGTGTATTCTTTCTCTTGGAAAACTCAG  
ACCCTTGCAGGACATGCCACACCAGGATTAGGTGAGCAGTCTGGTTCTC  
TAGAATGCCCTCTTATAAAGCTTGAGTTAGGGTAGAGGTAGGGAAGGCT  
AAGAATTGTAAGAAAAAATTTAATGAAGTGGAAACCAGAGAAAA  
TGTCAAAGCTGCTTGCATGTAGCACCAGCAACCAATTTCTGCACTTCCC  
TCCCTGCTTGGCTAAAATCCCTCTACAGAAGGTGCACCTCATTAGAACA  
GCATGTTCTCCCTAGCAGTCTCAACTGGTATGAGCTTATAACCTGGACAG  
TGGGGAGTGTCTGCCTAAGGCTGGTTTTGTTCAAGAGGGCCAACCTTACGCC  
TCCTTGAGGACAATTTCTTGGTGCATGTCTTGGGGCAGGGCCCAGTTTC  
ATGTCCATGGTACTCATGAGATGTTCTTTAAGAAAATAAAAGGGCTTTTGC  
ATCAATCTCTTGGGAAGAGAACTCCTCTGCAATCTTCTGGAACTCTTGAA  
GAGAGGCGATAAACTCATACAATCTTCTACACTCCACTGGCTAAGTTTAC  
TGGACAAGAACACAGGGTTGATGCTGTGAATCCTGGGGTAGGCAGAACTG  
TGTCAAAGTTCCCTGGGTACACTCCCCCTGACCAGCTCTCACTTATAAA  
GACCCAGGGACATTTGGAGAGAGTGTCTTACCTAAGTGGAAATCTCTGAA  
CCCTAGCTAGAGTCTTACCTTCGGAGCCACTTGCCCTGTATCTTAGC  
ATGGGTGATGTGAGGAGCTGCAGTAGGGTCCACACTGGTGAACACAAG  
CATTATGGACTTCTCAAGACTTCCATGTGTTTTCTCTTTCAGGCAGAA  
CTGAGGCTACAGCTCACACTATACTTTTTTTTTTTTTTTTTTTTTTTCATT  
TTTTTCCACCCCATGGCATATGGAGTTCCCGGGCCAGGGATCAGATCCGA  
GTCTCATTTGTGACCAAGCCGAGCTCTGGCAATGCTGGATCCTAAACC  
CCCTGTGCTGGGCCGGGATCAACCTGCTTCCAGGGCTCCAAAGACAGG  
GCCAGTCAAGCTCCTATACTCTACCTCTTAGTGCAACTCATGGAGTAGAA  
ACTCTTGGAGCCACAGAAGTGTCTGCAGGAGTGCACGTGCCACAAGGCT  
GGAACCTCAGGAGATTTGTCTCTTACTACTCAGCAGATGGGCTGTCCC  
CTCCCCAGGGGCCACCTGACTGATTCTCATTTCAGCCTTGTCTGGGAGGCCA  
GTCTACATAGAGCAGCTTCTCAGACTTTTGGAGTAACAAAACAACCCACTGG  
GAAAGGTTCTGCTCCATCCTGGATTCCAAAGCCCTCGATCATGTGGCTGA  
GCATGTGGGGCTTACCATGGAGGTTTGGAGTACCCATTTGTCTGGACAC  
CATGGCTAGTGTAGGAGGTGGTGTGTGGGCAGGGGCCATGGCTGCCAGT

TCCCCCTTTGGTGAATTAGTATTCCCTCTGGTCACTGGTTCAGCTTCTTC  
TCCAAACTGCTCTCCTTCTCCTCGGTGGCCTTGGAGCTCACTGCTAGTGC  
AGAACCCTTGGCAGGAACCCCTGAACCCAAGGTGAAGACATCATCTCCTTC  
CTCCTTGCATTTGACAGCCAATGTCTGGGTTTGCACAGCAGGTACACAGA  
CTGCATGTAGAAGACAACAGGGACCCAGACCTGTTGGCTGAGGGGCAGTG  
AGAGTCGTGGCTGCTGCTGCTGCTACTGCTGCACCCACTGGAGGTGCTGT  
GGGGAGAAGTACCGGGATTGACAGTGTGGAGCTGTACCAGAGGTGCGAT  
AGCAATCTGCTGCCTGGTCATCACCTGTTTCTCCAAGAGCTGGATCCGTT  
GCTATTGCTAAATTGGTGAATGGGGCTGGATCTGTGTGTGGGTGACTGAG  
CTAGTAAGGGTCTGCCTGGGGGAGGTGTAGCTCTCTATGTCAGGTTTCAT  
GCCCACATCCTGTGTACCACCTCCCATCTGCTTCTGTCTTCTTGGCCACTG  
CACTTTCTGCCTCTGTCCAGCCACCCTGGATCACCATCAGTGTGTTGAAAT  
GCAGGCAAGGGCTCCACCACATCCGCCTTTCTGGGACAGCTCCACCAC  
CACCCATTCTGGAGGAGGAACTGACTCAATGGCCCATTTCTACCTGGATC  
CATGGACCTCAGAATGCTATTCCCACTGCCTCCACCAAATGAACTAATGC  
TAAAGATTGGCCTGATCCCTATAGAGGAAACCTGAGCCACAGCCAGAGGC  
CTGGGGGAGGCTAGAGAGAGGAGAATTGGGTTGAGGCCTGTTGGTTCCTC  
ACTGCCCAGTGTGCTCCTGATCTGCATCTACACGGACTCCAGGAGCCTG  
AGCAGCTGGCACCTCCAGCCAGACTACAGTCACTGTCTAATAGGCATCA  
GGATGAGTTGAGAAGCTAAAGGCACATTCCAGCCATGGTCTGGTTTACT  
TGGAAAAAGTTCCCCTGCTGTAGTCTTAGGTACATCTGGGCCTGGAACAG  
GTTGAGGGGAGGAGGAGGTGGTGTTCACAGGAGCAGAGCTTGGGTCAA  
GTGGTAACATAGGGAGAGTTCACACTCGTGGATTGGCTGGTCAGTTGGGT  
GGCTGATGTTGTGGCCAGATTGACTGAGGCCTGGGTGTGCGTCAGCTGCT  
GTGTAGTGTGGTGTGTTGGGGAGCTGGCCTGCTGACTAGCAGCACTTGTG  
ATCAGCTGCACAGAGGCCAAGCTATGCAGCTGGGTCCGCTGAGCAGCAGG  
TTCACATGAACCTGGACTGGTAGAAAGACGGGGGCCATAGAGCTATCACA  
GCAATGCCTGCAGACCTGTTCTGCTTGTGTTTCATACAGTGGCTTTGAC  
TATCGGGGGCCGAGGGCTACCACCTGAGTTGGGACTCTCATTGGAGCAAC  
TGGCATTCTGTTGGCTCTAGTCTCCACGATAATGAGCCAGGGTCCCCAAG  
GCTGATGCTCTGGCTCAAGACGTCATAGCAAGCTCTGCACCCTGATCCTC  
CAGGGCAGTATCCAACCTACTCAATGCCAAGGTCCCCTGCTGTCAGGC  
AGTGTGGCTGGAAGTGGGAGGTGCTCATAACAGACATGAGGGGTGACTCAT  
CTCCACCCCATTCCTGGAGGGTCCGGGCACTGAGGTCAGGGCTCTGCCAG  
GCCTCTGGGGATTCCCTCCAGGACCATCTTTCCCTGCTAAGCGCAGAGAG  
GAAAGATGAAAGGTCTGGGGCCGAGGCTCACTTGGCCTATTAGTTATCTT  
TGAGGAAAATTTAGGAGCCAGGTAAGAGAAGGGGACAAAGTGAAGTGTA  
CAATGACAATATTCATCATAATTGCATTACGCCTTTTCTTTATGGAGAAC  
CTACTTCTTGCCAAGATCTTTGGAGAATCTTTTTTTTTTTTTTTTTGTCTT  
TTTTGCCATTTCTTGGGCCGCTTTTCTGnGGCATATGGGGATTCCCAGGCT  
AGGGGTGAAATTGGAGTTGTAGnCGCCGGCCTACACCACAGCCACAGCAA  
TGCGGGATCCGAGCCGTGTCTGCAACCTACACCAACGCCGGATCCTTAAC  
CCACTGAGCAAGGnCAGGGATCGAACCTGCAACCTCATGGTTCCTAnTCA  
GATTTCGTTAACCACTGAGCCACGATGGGAACTCCAAGGGCTTTGGAGAA  
TCATTGATCTGTTGAGCAACAGTCATTGAGCCCTGCCCTGTGCCTGAGG  
CTGGAAATACAAATAAGATTAACACACCCTTTACCTCAAGTTGCACAG  
AGAGCCAGGGTTGGGGGTGGGGCAGGGAAATGCTGATTCTCACCAGACC  
TGATAGAGGAGGCAGTAGTCTCTCCATTGAGCAGATGAAGAACTGTGGC  
TCAAAGCTAAATGGAATCATCATGTTTACATGGCTAGTAAGTTCCAGGGC  
TAGGATTCAGTTGTGGTCTGTCTGTGCATTTGACTCTGCTGTAAAAATGG  
AAGCGGTCCATGAGTTAGGGATTTCTTCTGCTCTCTCACACTCAGCT  
GCCTGTTTATGGCCTTCTTACCTTCTTGTTCAGTCAAGTCAAGTCCAGGCAA  
ATTGCCCAAATACTGAGAAATCTCTTAGGCAGTTCACCCTACCGCACAT  
ACTAAACCAAGGTGGAGGGTGGGAAGGGAAATGAGTGGGCAAAAATGACT  
TCAGATTCATAGCCATGCTTCTCAGTAAACAGGCCACCCTCTTCCCTAAA  
AACCTCTGCCCTGTAAGCTGATTTTCATCTCTCTTTGTCTCCAGACTCT  
CCCAGGCCTTCTTCCAATA**AC**CAGAAATCACATCCAGATGCACAGGGTCC  
CTGAGACTGGAGTAGGCAGTCTGGCACCTGTAGTATCCGCTGCTAGCTCT  
CCTGGCCTTAAAGCTGAAGCTGGGCTGGTCTCGGTCCAGGTGAAGTTCC  
CATTATGGAACCACTGGGTGGTGGTGTTCACAGGGTCATGGTCCGCCCTGG  
CACGTCACTGTACAGAATCCTCCTGGAGCACATTGATCCATGCAGGCTG

AAGCTTCACCTCAGCCTTTGGGAGAAGCTCTAAGGGGCAGAGAGAAGAGG  
CAGCATGAGGAAAGGGTCCCCTAGGGCCCAAGTAGACCCAAATGTTGG  
ATAATGGGAAACTGTGGCCCTGCTGGAGACATCAGGAGAGGAACCCACC  
AGAAGTGTGTGCAACTGAAGGCAATTCCTCCAACCTCATATAGCCCACCC  
AGGGGCCCAAGAAGCCAAGTTCTCCCAGGGAGCTTGTCTGCTCCTCAGG  
CAGATTAAGAAGGAAGGGAATAGGAGAGGGGGCAAGGCAGACAAATACAA  
AATACAAGTACACCTGACCAAAGGATGTCTAACCGGTTCTTTCTTCTCT  
CCATCTCTCTGTCTCATCTCTCTCTCTCTGCTTTCTCTCTTCTCTCTCAC  
ACACATGCACTATACATACATCTTTTTGGGGAATCAATTTCTCTCCTGTA  
AATTGAGGTATTTGGACGTTAGTAGATAAACGCTCTCCACAGTTGGATGA  
AGACAAGTGGGGACATCTGGTGGAGATGCCAGGCTGAGAGTCAGATGTCA  
TGTTTCTCTTCTGACCGATTGTCAATTCTGAAACTACACTCCTCCTCGGAT  
GGGGCTCAAACCCATCTGTACCTTAGATTGGGACTTGAATCCACTGTCTGT  
CTAATTAATAACTGTTTACCTGGTTTTCATGACTTACTGAAGCTCAAGTTGT  
TTTGTCTTGGTGCAAAATAATTTAGCATGAGGCGAAGTTGCAGGCAAAG  
CATAAATTTCTTAGCATAGGACCTTGTGACAGGTAACAGGCCAGCA  
AGGGAGCTCAGCCCCTGAGAACAAAGAGGGCTCCATTTGGAGTTCTCCTA  
TGGCACAGTGGGTTAAGGATCTGGCATTGTACCGTAGCAGCTTGGGTCA  
CTGCTGTGGCATGGGTTTAAATCCCTGGCCTGGGAATTTTGCATGCTGCA  
GGCCTGGCAAAAAAAAAAAAAAGTCTACATTTTTATAATCAGAAAGTGGAG  
ACGGGAGAAAAGCACCTTCTTCTCATTTTTGCATAGATATAACTACATC  
ATTAGTTCTTCTTTGACCCATATAGGTCTAACCAAGACTGTCTTAGCAC  
TATTTATATCATATATATATATTAGCAGAAAAGGTGGTAACATATACTAAAAAT  
ATGGTAATTCATCTCAGGTTTCAATATAATGTCCCCTTTCACCTAGTTTC  
TTTCTCCTTTTCAATTTATATTTCCCATCTTGGCTCCATGCAGAAATGCTGCT  
CTTCAAGAACCATTAACCTTTCTAACTTCATGTAACAAGATTCAGACCCCA  
TACCTATTGTCTTGTGTTTTAACTATCAGGACTTGTGGCTTGAGTATGCC  
TGGCTCTTGAATGCACCTGGTCTCCTTCAAGATAGAGTAGATGGTTGATA  
GGTTACTGGATTTTCTTGGAGTGGTCATTAGCTTACAACCTGTCTCCCAGAC  
TCCCTTAAATTTCTTTCTGTCTTTATTTCCCTAGTGGGATTTCTAAA  
CTAATTATCCTACTTTATCCCTATCAATTTCTTTACCCCTTAGAATAAATC  
TATCCTGACACCATAAAAAATATTAATAAATAAATTAATAAACCACAAAAA  
AAAAAGCAAAAAAGGGAGTTTCTGTCTGGCACAGTGGAAACGAATCTG  
AATCCAACCTAGGAACCTGAGGTTGTAGGTTCAATTCCTGGCCTTGCTCA  
GTGGATTAAGGATCCAGCACTGCTGTGAGCTGTGGTGTAGGTCACAGACA  
CAGCTCAGATCTGGCATTGCTGTGGCTGTGGCCTAGGCTGACAGCTATAG  
CTCCGATTAGACCTTTAGCCTGGGAACCTCCATATGCTGCAGGTGAGGCC  
CTAAAAAAAAAAAAAAAAAAAAAAAAAAGAATAAATCTATCCTGACACCAAAG  
CACAAAGGAGATCCTGTGGCCTCAGGAAAGATAAGGAAAGGGGGAGAAAG  
GCTGGAGGACCAGTCTAGGGAAATCCTGGCTTCAGTGCCCCAGGAAGACC  
CCCATCTCCCTACCAGTCTTAGGAGGTTGAGAGGTTAGTCATGCTGAGAA  
AGAAGTGCCCAGCAGTGTTCACCTCACCAAGTTGCAACCATTTGGTATCTC  
CTCCTATTATTGTCCGGGGAAACAGGCTCTGAAGCCCTCGGATGTATGAA  
AAGTAGAGGATTTATCAACACAGTGGGATGGTCTAAGCAGATCATGTGAT  
TTTGCATGTGGCTGAAACAAAAATTCCTGGGCTCGTGATTTAGTTTGGGA  
AAGAGGAAGACAGTTGAAAGAAAGGACATTTCTTTTCTGTGACACTATGT  
ATGAGGTCTCATGGTTAACAGAACCAGAAGGGCTGAAGTACCTGTGCATG  
GTGCTGCCCATCCCCCGCTTCCCTGGGAGGAAGAGAAGGAGGAAGAAGAA  
AGGGACAAGGCATCTTGAGGGAGCAATTATTCTTCCCTGGCTCTGCTTAA  
GTCCTGGGTTGCTGCTGCATTAGACAGAGCATCTCCAGACAGAGTGCTG  
GGAGCAGAGCGAGGAGGTAGCTGTTGTGGGGAGAGGATGTGGGTGGAGCA  
CTTACACGCTGTCCCAGGAACAGGAGCTGTAAGAGAGAAAGCAAAGATCA  
GCCTGGTGTTTGGATTCAATTGATTCATCATTATAAATAATCACCTCCTTG  
CTGATCCCCTGAACTCTCTTGTCCCTTTTCTGGCTGCAATTCATTCACCTG  
TGTTGTCTGTGCTTTTACTTCTTTCAGTTATGTGTTGATTAAATAACCACA  
CAGGAGGAGTTCCCCTGTGGCTCAGCGGAAACGAATCTGACTAGAAACC  
ATGAGGTCATGGGTTCCATCCCTGGCTTCACTCAGTGGGTTAAGGATCCA  
ACATTGCTGTGGCTGTGGCTGCTGTGTCTGTGCTGTGGCTGTGGCGTAGT  
CCAGCAGCTGTAGCTCTGATTGGACCCATAGCCTGGGAATCCCCACGGCC  
CTAAAAAGCAAAAAATAAAAAATAAAAAATAAACCCACACAGGAGTTGGAT  
TGGTATATGTAAATTTACTGTCTCCATATTCAAAAAGGACACTGAACTGCC

ATTCTGACACTTTTCTCTGTAAATTTGCTCTTCTGTGCTTGATAGTGAC  
ACTCATCTTTTCTGCTTAATGGCCGTGCAGTGCAAGGAAGCATGCATGC  
TCCTCTGGTCCCACAGTTGATGATTCTAGAATTGCCGTGGTGTTTACATTC  
TCTGAGCCCCATTCCATGGATAACCGAGACCCTCTTATGCTTTTTCCCAG  
GGGAAATTCCTTACACCTAAAGAGAGTAGTTGCCGTGGAGTGGTGTGAGGG  
GCACAGAGAATGGCCACTGCACCCACCACAGTGTATCTTCCCTCCACCT  
GCTATTTGCATAAGACAGCATTAGCCTTCCCACCTAAGATGTGGTCCCAG  
TGAAACACACAAAAAAGGAAGGTAAACAnnnnGGCCnCTCATnAGnCTT  
TCAAGTCTATGACACTAGACTTTCTCAGAGCTGGCTCTGCTGTGACAGGG  
TGGCAGAGACACCAAGGACATGTGAACCCAGTGAGATTGGGCAAAAGACTT  
AAAAAGAGATTGGCnAAAAAAACTTCTGATTCTGCCAATTTACAAATT  
TGCCAAAGCCAGCAGGGTGGTCAGAATTTGATTTCATCAGCCTGCCCTC  
ACCCTCCTGAnTnCTGACGTGCTTCCCATGCCCCCAACTCCTCAACT  
TTGCCCAAGCTCAGCCCCAACCGAGGTGGCAGCAGCTGAGTTAGAAAAGC  
ACACCTGCCTCTGCTCCTGCTCCACCGTCCCTCCTGGGGACTCTCACT**CA**  
**C**CCAGGAATAGCAGAGCTGTCCACAGGAGCATGTGGCCCAAAGGATGGCA  
GGGCATGCAATCAGCCCAGTCACTCCTGGCAGnGGGGAGGGCTAGGAACG  
AGGGGATCCC**CAT**CACCTCCTGGAGTACGCAGGTTGCCTCTGGCAGCGCC  
AGCGCAAGACAGGCTTCTCTCAAGGCTCGACAGATTCCACCCAGAGGAC  
AGACAAATTTCTGGAGAGCAAAAGAGGAAGTAAAAAGAAATGTTTTCTCAT  
TAGCTCCTCCCCTCCACCTCTTTTCATCTCAACTGTCTCCTCCCAGAAGA  
TTCAGGGCTTCCCAGAATGGATGTTTCTCAGTCCCCTCCAAATTCACAG  
AAAATGTAGAAATTGGGAAACAACCTTCTCTTCTCTGGGGCTCAGCTGG  
GCTCAGCCTCTGGGAGAAAGAGGGAGGGGACTAGTTACTCAAACCTCAGCT  
CACAACCTCCTGTCTGTCTGTCTTTTTTTTTTTTTTTTTnnnnnTTTTTG  
TCTTTTTGCCATTTCTTGGACCACTCCTGTGGCATATGGAGGTTCCCAGG  
CnAGGGGTGCAATTGGAGCTGCAGCCACCAGCCTACACCAGAGCCACAGC  
AATGCCAGATCCGAGCCGTGTCTGTGACCTACGCCACAGCTCGTGGCAAA  
GCCAGATCTTTAACCCACTGnGCAAGGCCAGGGATCTAAnCCACAACCTC  
ATAGTTCCATTCGATTCCGTTAACCCTnCGCCACGACAGGAACCTTCC  
CTCTGTCTCTTTAGAACAGGCGATGGAGGAGAGTGACCCCCAGTCTTTC  
CATACTTCTAGATCCATTAGAGGCCTAGATGTTAGnGGCTACATGGGGG  
CTCATTGTTAAAATGGCTCATTATGCTGACCCAAGAGACTGACCACCATG  
TTCAGATGACATCTGGTTTTTACCACCTGGTGCCTCCTTTCCCAAGACTAC  
AAGACCCCCCACTGTGGGACACTACACACCTCCAGCTTTCTCAAGATTAT  
GAAACCACCTACCGTGAGACACCTCTGACTTTCTCATGACTATGTGACC  
ACCAGAGTCCAGCTGCAGGAGAAAGATAAACTAATCTCCCCGGCTTCAG  
GGAATACAATTTCCCATCCACAGAGTATAAGAAGGCCCTGGAGAAGGGC  
TGGGGAATGGCTCTTCTCAAGAGTCAGTACCCTCTCCTTTTCCCTCTAA  
TAAATTTTCTTTTATTTGCTGAATACCTGGCTCGTTCTCGTTTTCTCCA  
CACTCACCTTACACTAGACACCTGCATCAGATTCTCTGGAGGCTGAGCT  
TGGCGGCTTGAGACCAACCACCATCATCATTTGATTTTCTTTATTATCAT  
AATCCTGACTCTGTTTTGGATTGTGGAACAAGGACAAAGAATATGTCTGG  
GTGGCAGTGGGATGATCCCCTCACCTTCTTATTTCCCTTTTTCATCCATTC  
TTTCACTCATTCTCTGACAGATATCTTTTGAATAATAATTTGTGCTCTG  
CATGATGAAAGAGCAGAACTTTGGAAGTGTATATGCCTAATTTTGAATGA  
CAGGCATCTTCTCAGAACTACAGATTCTAATCTGTATAAATGAAGATTA  
TCATACCCACTGCATTGCAAATCAACTCTACTTCAATTTTTTAAAAGACC  
AAAAAAGTGAAGAATATATGCCTATCCTTCAAGCAGGATTTTCGCAGCC  
TCAGTACTCTTGATATTTTGGGCCAATTAATTCTTGTGAGGACCTGTTTT  
GTACCTGTAGGATGTTTTGCAGCATCTCTGACCTCTACACACCAGACACC  
AGGGACACTTCTAGTCATGAAAATAAAAACGCCCTTAGACATTGGCAAA  
TGTACTCTTGGGGCAACATTGCCCTGGTTGAAATCCACAGCACTCAAGA  
TTTTTAAGGAGTTTCTGCTGTAGCTCAGTGAGTTAAGGATCTGACTTCGC  
CACAGCTGTGGCATTAGGTCACAGCTGCAGCCTGTATTTGATCCCAGCCT  
GGGATCCCTATGCCGTATGTGCAGCCGAAAAAAAAAAAAAAAAAAGA  
TTTTTTGAAATTAAGAAGAAATTTGTGTGCTAGCAAATTCCTGGTGCCT  
TGTGGGTATCCAGTCATGCTAATTTCCCTTTTTTGTCTTCTGTCACCATC  
TTCATATCATTTGTCCACCTTCAACATCCCTAGCACATGACATAGTCTG  
GGATCTCTCTGGGGCCTTACCTCAGACCTCTTCTCAAAATGCTTCTTA



TCTATCTGAATTGCCTTTCCACTCTGAAGAGATTGTAAGACTGCAAACAA  
AACTCTACCAGTTAGTGGCCTTACAGACATCTCATATCCACCCTCCAAGG  
AAGGCTACCAAATGAGACCCTCTGATAAACTGCTACCAGTTATTCCCCTA  
AACAGCCAAAGGCCAACTAAAATTACTGGAAAACCTTACCAAAGTCTGAC  
AGATAACCATAACTACACTCTAGCCCTCTCTTGCTCCAGAGTCTCCGGAAG  
GAATTCTGGATAAAATTGGCAGAAGCTGCTGAAGGGTGAGAATTCTTACCA  
AAGTCAGATTTTCCAGCTCTCTGAAGTGCTTAGTCAAGAGAAGAATATAA  
AATTTTTTGTGTTTTCTTTCCAAATTCAGACTTTTGTGAATTTGGT  
TTTTGGGGTAGCCATTGGTTGTCAATCCTTTCTCTTCCAGGGAAAGATACT  
GCCTTTTTGTGTTGTGTTGAAAACCTTACTTGGCCAATATCAGGCTGTGTT  
AAGCAGATAAGTTAACCCAGGAGAAAGAGGACCAGGAATAGCTTTCTTGA  
CAAAAGAAAAGCCATTTTGGCCTAAGCCATTTTGTGATCTAAGCCTGACT  
ACAATGCTTGCCCTTTTATAAGTCAAAGTAATTAATGACCTCAAGGGAAA  
TAAGAGAATGCAGGAACAAAAGGAAAAGGCAGTCAAACAATAGTGCAGTGAT  
AAAGCCAAATCCTAACATAATATGTCTTTGAGTTCTGCAGAAAATAAGG  
CCCCACTCAGGTGGAGGGGGGAAAAGATGACATTTTCTCTTAGGACTTCT  
ATCAACTAAAGCTTGGACTCAGTTGACATTTGCCCAATCTATCTGCTC  
AAGCCCCTTCATGAATATGCATGTCTCCTTAGCTTAAAACCTCCAACCTT  
TGTTGTTCTAGGAGGCATGAAGATTATCATGCCTATTCTTCAAGGATTC  
TCAACCTCAGTACTATTGACATTTTGGGCCAATTAATGCTTGTGAGGATC  
TGTTCTGTACATTGTAGGATCTTTTACAGTATCTCTGACCTCTGTACTAG  
ATGCCGGGGGCACCTCCTAGTTGTAGAAAATAAAAATGCCTCTAGACATC  
AGCAAATGTTCCCTTGGGAGCAACGTTGCCCTGGTTAGAACCACCGTAC  
TTAAGATTTTTGAGCAGATCCCATTGTGGCGTAGTGGGTTAAGCACCTCA  
CATTGCTGCAGCTGTGGTATAGATCACAGCTGAGGTTTGGATTTGATCCC  
TGGCCCTGGAACCTCCCTATGCCATGGTTGCAGCTGAAAATATATATATA  
TATATATnnTTTTTTTTTTTTTAATTAAGAGAATTTGTATGTTAGCAAA  
ATGCCTGGTGCATGGGAAATATCACTGATGTTCTCCGTACTTGTAGCAA  
GTAAAAATAAATCTTTCTTCTCCCTTGCTTTGATTTGGTTGTGCTTTTT  
TGATGGGGACGTAATAAGATAGTTAGACAGGTAGTTGTGGAAGTCCCAGT  
AAGGGACCATAGATAGGGAAACCTAGGGAACCTTTGAGACATCACTGTTAT  
AAGAAAGCCATCAGAATGTGTGAGGATGGAGTGAGGCCTGCATTGAGGTT  
CAGACCAAGGGCAGGAGTTTAAGGACCACCCTTCTGCTGATTTTAATAAG  
TGCCATGGCAGCCCTAGTTTACCTTATAACCTTATTACCTGATATCTAGG  
ATGAGCTACTATGAGAAAGAGGAAGAGGTGGTCTTTTCTCAGCCCCACTC  
CTCTTGATTATAAAAACCTGTACCCACCTAATCCTCAGGGCAGAGCCTC  
CTTGCCCTGCTCATTGCTCTCTCACAAGCATCCTACCTTAATAAATCTG  
TTTTCTTGCCATCACTTTTTCTTACTGAATTCCTTCTGTGCTGAAACA  
CAAAGAACCTGAACATCAGTAAGTCCAGACACCAGGTGAATTATTCTAAT  
TCAAAATCCATGGATTCAAGCTCCAATCTGGGTTTTGGCTGGATTCAAGT  
CCCAATCTGGGTTCTGGCTAGGTTCAAGTCATTCATGCCATCAGTTTCGT  
TTTGGCTTGACACTCACCAGGAAGTGAACCAATTTCCGAGTAACAGTTG  
GGGGCCAAAAATGTGGCCAGGCAGAAATGTGTTGTAGTGTAAGCTCTG  
ACAGTATTTTCAATTTTGAATATAAGTGCCTGACTTAAGCTTTTGGATTG  
CCAAGACATCCATTCAAAGGCAGCCCCCTCAAAGAAGGCTATCTCAGTT  
AGACACAGTACCAACCACAGGATAGATAAAGAGCCAGCCACGTTCTPAT  
GGCCTCCTCACCCTGAGGATTCTTAGTTTTAGAGATCTTCATGGATTT  
CAATAAATGACCATTGGGATACATGGGGTTTTTGTGTTGGTTTTTTTTCT  
CATCCTGTGTTTTATATTCTCTTATGTTTTAAATTCACCCCAAAGAGTG  
AGCTCCCACCCAAAACCCAGGCACCCACCCTCAACCCTAGTAAAAGCAG  
AACCCATGCCATGTGCACTCTCTGACTCCCTATGACCTTGAAACAGGAG  
GGAAGCAGGCAGGGCCTTTTTTTTTTTTTTTTTTTTTTTTTTTTTTTTTT  
TnTnnnnnnnnnTcnnTnnnnnTnTnnAGnnnnnnnnnnnnAGnnnTnnnn  
TnGnnnnnnnnnnTnTnnnnGnCTnCACnGnGnnAnAnnnAnnnnnnnnnCC  
AAGACGAGTCTGCAGCCTACACCACAGCTCACGGTAAAGCCAGATCCTTA  
ACCCACTGAGCAAGGCCAGGGATAGAACTCGCAACCTCATGGTTCTTAGT  
CAGATTTGTTAACCACTGAGCCACAACAGGAACCTCCAGGGCATAACTTTT  
TAAAAATTACATAGCCATTGAGTGTGGAGAGACATCTTCTGATGTATTT  
TCTAAGCCCTAAGGAACTATAAGTTGGAAAAGTGCTTATTCATGCTGAT  
GTGGAATTTAGCTATAAGTAACTATAAATAAGGGGCTAGAGGGAACTTGG  
CTTGGCTCAGCATTAGCTGAGAGGACAAGGTGTTGACCTTGAAAAATTGG

GTCAGCTCAAGTCAGAAAACCTGCTCAAGCAAGCACTGGTTGTTCCCTCCAG  
ATGATATGCATGGATAGATAGCTGACTCCAGCCTTATGGATGCCCTTTAC  
ATATAGAGTGTAAAGAGTAAAGGTCAGAGTTAAAATACAAAGTACTGGAG  
GCAGAGGGCCTTGGGGTTTCTATTTTCTCACATTTTTTACATTCCCTGAGA  
GCACAATAAAGACTATGAGGCATCAACATGACATTTGAGGGTCTTGATCC  
ATGAGGTCTTGAGTTCCCTGGTCCCATCTTTAAACTTTACTCTGTCTTTC  
ATTGTTGCCATTTAACTTTTTTTTTTTTTTTTTTTTTTTGGTCTTTTTGCC  
ATTCCTTGGGCTGCTCCTGTGGCATGTGGATTGAATCGGAGCCGTAGCCG  
CCGGCCTAGCCAGAGCTACAGCAACGCAGGATCCGAGCCACGTCTGCAAC  
TACAGCTCACGGCAATGCCGGATCCTTAACCCACTGAGCAAGGGCAGGGA  
TCGAAACCCGCAACCTCATGGTTCCCAGTCGGATTTGCTAACCACTGAGCC  
ACCACAGGAACTCTCCGTTTAAACATTTCTTAAGCTTTTCGGGGCCGCCCT  
TCGGCTCGCTCGAGCTGGTnnCnnCnnnnnnnnnnAnAnCnAnAnCnnnn  
nnGnAnCCnnnnnnCnnnnGnnnnnnnnAnnnnnnnGnCnnnnnnnnGnnCCT  
TnAnCCnCnnnnnnAnGnnCAnnGnnnGnnAnnnnnAnCTnAnnGnnnnnn  
nnnnnnnnTnnCnnnnCAnTnnnnnnnnCnnAnnAnnnnnnnnnGnnnAAnnTn  
TnnnnnnGnnTnnnnnnnnnnGnnnTnnnnnnnnnnCnAnnnnnnnnnnnnnA  
AnnnAnnAnAnAAAnAAAnnnnnGnTnCnnnCnnnnnnnnnnnnnnAnCnnn  
nnnGnnTnGnnnnCnnGnGGnnnnnnGnnnCnnnnnnCTnnnnTnnnTnnnn  
GGnnTnAGnAnCnnnnnnnnnnnnGnnnnCnGnnnnnnnnGnnnGnnnnnnnnG  
nCTnnnnATnnnnnnGnnnnnnnnGnnTnnGGTnnnnnnnnnnnnnnAnAnCT  
nnnAnnnAnnnnnnnAnnnnnnnAAnnnnnAnAnnnnnAnnnnnnnnnnnnnA  
AnAAAnAnnAAAnAAAnAnCnnnAnnnCnnnTCTGAATAGTTGGAATAA  
TCCTCCCACCTGTTAGCATATGAAATTACCCAGCCTATAAAAACTAAACCA  
CACTACATTTCCAGGCTGCTCTCTCACATTTTGGGATGGATGGACTATGT  
TCTGTCTATGGAATGTATATCTTCCAGGCTGCTCTCGCCTTCTGAGATGG  
CCCACACTCTTATCAATAAATCTACTTTTACTTATCCCTTCCCTCTCACT  
AAAAAGGCCTTCTGCACCTTAGATGTAAAGAACTTGAACCTCAGTAAGTCC  
TGAGACTAAGTGTATAATTTAATTAATAAAGACAATGAGTTCAAGTCCCAG  
TGTGAGCTTTGTCTAGGTTCTGGTTCCAGCCCTAGCTTTAAGTCCAAT  
CTGAGTCGTGGGGTTTTAGTCTCACTGTGTTACCCAAAGTGTGCTATGCA  
ATTTCCAGGTCTTGCCAAGTAATACGTCTCTATTTTTTTTTCAGTTTCCTAG  
TAGTTATTGCTCAAGGGCACCTTGCAATGATAAGAAGTAAAAAGAACTGGT  
CCAACAACCACACTGGTTATTGATAGAAAGACAAGCACAAAAAAGGTTG  
CACCCCATTTATAGCTGGGGTCCCTACTGACTTGACAGCTCTTATAGGAAT  
TATCTTTCTCCTGGCAACTTTAGTGAGTGGCTCTGGATCTTGGGAGTGCT  
AGTATGTTTTGCTCTCTAGTTTTTTAAGGCCTTCTCCCTAAGCTAAATGGC  
TCTAGGTACCCAGAGGACAGAAAAACGTTCCCAAAACAACAGCGATAAA  
TATAGAACATAAGATTTTTATTTATTTATTTATTTATTTGCCCCACTCGCA  
GCATGCATCCAACTATGCCACAGCAGAGACCTGAGCCCCAGCAGCAACA  
ATACTGGGCCCTTAACCCACTATGCCACCAGGTAATTTCCCATGGATTTTT  
TTTTAAGTTGAGTAAATCCGTATTTTACTTATTGGTTTATTTTTATTGAA  
ATACAGTGATTTATAGGATTCTTTAGGATTCTTTTTTTTTTTTTTCTTT  
CTGGCCATACCTGTGCCATGTGGAAGTTCTCAGGCCAGGGATCCAAACCA  
CACCATAGCAGTGACAACACCAGGTCCTTAACCCCTCGAGCCACAGAGTA  
ACTCTTACAGGATTATTTTTATTTTATTTTATTTTATTTTTTTTGGTCTTT  
TTAGGGCTACACTCTTGGCATATGGAAGTTCCCAGGCTAGGGAATCAGAG  
CTGTAGCTGCTGGGCTATGCCACAGCAACACAAGATCTGAGCCACATCTG  
TGACCTACACCACAGCTCACAGAAAAGGCTGGATCCTTAACCCACTGnGCA  
AGACCAGGGATCGAACCTGTGTCCACATGGATGATAGTCAGATTCGTTAC  
TACTGAGCCAAGACAGGAACCTCTTTAATTTCTAACTCAATTGAAGA  
GTTTCTCTTGACATAAAGAAGCAAATCGAAGACAATGGAGTTCCCATTTGT  
GGCTCAGCAGTAATGAACCCGATTAGTATCCCAGGCTGGCGGTCCAATCG  
GAGCTATGGCTGTGGCCCTACACCACAACCTACAGCAACGCCAGATCCAAG  
CATGGATCCAAGACATCTAAGCCATGTCTGTGACCTGCACCAGAGCTCTC  
AGTAGTGCTGGATCCTTAACCCGCTGAGCAAGGCCAGGGATCAAACCCAA  
AACCTCACGGTTCTAGTCGGATTCACTTCCCCTGCGCCATGATGGGAAC  
TCCCATAAACTAGTGAGTTTTGCATTATCATAGTGTGACTAAAAATTTTTT  
AAGGGGATCTATAAGATTTCTGTGTCTCTACATATGTTTGTCTATATACA  
CATGTTATAAATATGTGATTTGTTTCCAACCTCGGTTTCATGTTGCCAAAA  
TAAATTTGTAAAAGAGCTCTATTTAATTGGCTGAAAGAAAACCTAAGCAAT



TATATAAGTCTAGTATACTCTCAGAAATAAGGAAATTAACCTCAAATATTT  
TTCAAGTTCACATGATCTAGGAGAACCTTTTGTAAATAAAAAGCTAGTTTA  
GTTTGTGTCAGTTTAAATCAAAACAGCCATGTCTTTATAGTTATCAGCATTAA  
ATATGATACTTTGTAACCTGAACAGGACCCAATGGGGCCTTTTTGGGACAG  
ACCCCTTCCCTCATATCCTTTTGCTTTAGCTCCTGTCTAAAAATCCTTAGATA  
ACAATATCTGATGCCCATTTCCCGATTTGTTTTGCAGATGCTAAAAACCAC  
CACCAAGTGGGAGAAATTAACCTACATGATCCTGAGCAGTAGCTTCCAGAC  
CTACTGGCACTTTAGGACTCATAGTGTAGCCCTGCAACATTTGCCATTAC  
TTCACCACCTCCAATCAGAGAATTGTGCATGAGCTGTTACATATCCTGG  
GATACCCCTGGCCTTACTTTGCCTTTAAAAATGCTTTGCTGAAACCCGTTG  
AGGAGTTTGAGGTTTTTTGAGCACTAGCTATCCTAAACTCCTTGCTTTGGCA  
CTGTGCAACAAATGATGAACCTTCCCTTACCACAGCCAGTATCAGTAGA  
TTGGCTTTGTTGAACACAAGCTAGTGGACCCAAGTTTTGGTCAGGAACAC  
TTTTTATTCTACCTGCATTTACTAAAAAGTCAAATAAGTTCATGTTATCTCT  
GTTACAGAATTTGTGAGCAAGAAAAGATAACTTAAGATGAAGCTTAGCTGT  
TTAATGTCTCATTAAATTTTTTATTTATTTATTTATGTCTTTTTGCCTTTT  
CTAGGGCCGCTCCCAGGCATATGGAGGTTCCAGGCTAGGGGTCTAATC  
GGAGCTGTAGCCTTTGGCCTATGCCAGAGCCACAGCAACACAGGATCCGA  
GCCACGTCTGCAACCTACACCACAGTTCACGGCAATGCCGGATCCTTAAC  
CCACTAAGCAAGGCCAGGGATCAAACCCGAAACCTTGTGGTTCTTAGTCTG  
GATTCGTTAACCCTGCAACACGACGGGAACCTCCTCATTAAATTTTTATA  
AGCAACCTAAACATAATCGTTAAGAATAAAATTAGATATGGTACAAGTTTA  
TAAGTAAACTTTTTAAAAACAATATGCTTTATGATACATCTACTTAAAA  
ATAGTTTCTAGGAGTTCATTGTGGCTCAGTGGGTTAAGGACCCAATGT  
TGTCTCTTTGAGGATGTGGGTTTTGGGTTCAATCCCTGGCCTAGCTCAGTG  
GGTTAAGGATCCCGCATTGCAAAGCAGCTCAGATCTAGTGTGGCATGGC  
TGTGGCATAAGGCCCCAGCTGCAGCCCCCATTGACCCCTGGCCTGGGAAC  
TTCCATATGCCCAGCTAGTGGCCCTAAAAAGAAAAAAGTTTCCAAAGTT  
TCCAAAATGTTTTTTGGTAACCTAAAATCTTAAGTTTTGTGGGGTTTTCTT  
TTGGGGGGGATTGTTTTGTTTTGTTTTGGTCTTTTTTTCAGGGCTACGCCAGC  
GGTATATGAAATTTCCAGGCTAGGGGTTGAATCAGAGCTGTAGCTGCTA  
GCCTACGCCACAGCCACAACAATGCCAGATCCAAGCCTCATCTGCTACCT  
ACACCACAGCTCAGGGCAACACTGGATCCTTAACCCACTGAGCAAGGCCA  
GGGATCAAACCCAAGTCTTCTTGGATAACAAGTCGAGTTTGTACTGCTGA  
GCCACAATGGGAACCTCAAACCTTAACGTCATACTAAAAATAAATGATAG  
ATATTCATTGAATATTTTTTATCATTGCAAGTAAGATAAAAATACTGAAAC  
ATTAATTGCTGAACATGGGTTTTATCTGCTTTTGGCTTCCCTTTACAGAGG  
AGCTAAAGATATTTTCAGTCTCTTAGTAAACATGGTTTCTGCCACACTGAA  
AAGTTTTACTATGAGGAGGAATATACTTCTAGAAATTTCAAATGTATTT  
ATATATTTTGCAGTCCACAAGATGCTAGTGTACAGACAGTCCACAGTTT  
CTCACTTTTTAATTTTTACCAGGAATTAAGGGATTCTGAGGGTAAAAAGTT  
ATAATAAATACATGTAATTAACCTACTAGAAATAATATCAAAAAATATCT  
CTATGCAAGGTATGGAGATGTGTTTTTGTAAAGGAAAAAAGAGTAATTTT  
GTCCTAAAGTAAAATGATAGTTCAGAAATTAGAAAAGAGAAAAAATTAGGG  
AAAAACTTGAATGGAGGTAACACAGTTGTA AAAAGTTTGTGAAAAAGTAT  
TTTTGGTGAAGGAATTTTAAGTGCAGTTAAGCTGGAAGGTGTGGGTAAGG  
TTGGAACAGATTTAATTTAAGTTTTTTAAAAATGTTAATATCAAAAAATAGAC  
CCATGCAAAAATTAGACTTTTGGTTTTCTGTTAAAAAAGAAAGAAAGTC  
TTATTGAACTGTGAGTTTGTCTTTGATAAGAGTGTGTGAACATTTCTTTT  
TAATTTTTTTTACTCTTTGGGCAGTCTACTTGGACAGCAAAGATTTTGAGT  
TTTACTAAAAATAATTTCTTGTGTTTTATGTTGTTATTTATCAGCTCTTTA  
ATTACTTAAGAAAACCCAGTCTTCCCAATATTA AAAAGAGCAAAGATTTAT  
ACACAATATAGTCTTTTGCATCTGCCTTTAAAAATCATTATTTGTCACTCT  
AGTTAAATAGATAATTAAGGAGTTCTCTTGTGGTGCAACAGGTTAAGAA  
TACTGCAGTGGCATGGGTTTTGATTCCTGGCTCAGGAACCTCCACATGTA  
TGAGTGCAGTCAGAAAAGAAAAGAAAGGAGGGAAGAGAGGGAGGGGAGAGA  
GAGAGAGCGAGGGAGAGGGGAGAGGGGAGAGAGACAGAGAGAAAAAGAGGAA  
GGGAGGAAGGGAGGnAAAAGnnnnnnnCCCATTTGTGGTGCAGTGGAAACAA  
ATCTGACTAGAAACCATGAGGTTGAAGGTTCAATCCCTGGCCCCCTGCT  
TGCTGTGGCTGTGGTGTAGGCTCCTATTA AACCACTATCCTGGGTATCTC  
CATATGCTGCAGGTGTGGACCTAAAAAGAAATGAAAAAAGAGAAAGATAA

TCCAGTATTATTTTCATAATGTTCTGTGATCCTATTTAGTCAAATGTTCAA  
ACTTTTTGCCTTCTTCACAAATCCCCAAATCAAATTTCTAAATGGAGTCC  
TTTCTTTTTTTTTTTTTTTTTTTTTTTTTTTTTTTTTTTTTnGCTGTACTCATGGCTTACAG  
AAATTCTTAGGCCAAGGATTCAATCAGAGCAAATGCAGTCTACACCGCAG  
TTGTGGCAACACTGGATCCTTTAACCTACTGCACCAGGGCAGGGATCAAA  
CCTGCACCTCTGCAATAAATGAAATCTTTTTAACCTCAAAGGAACTTTGA  
GATTTCCCAGATACCCCCTGGAATTCTCAAGGGATTTGTCTCTCGGCTTG  
TACAATGAGAGATGTTGAGCCAATTAGGTCTATTTGGTATGTTAAATTAT  
ATGTGTTAACATTGTCAAATAAACAGTGATGATAGGAGATCCCTAGTGGC  
TGAGCTGGTTAAGGATCTGGCATTGCCATTGTTGTGGCTGTGATTGCTGC  
CTATGGCACAGGTTCAATCCCTGCTGGCACAGGAAATTCGGAATGCCACA  
GGCCTGACAAAAAAAAAGAAAAGATGATTAAAAAAAAAAGCCGTTGTAAATC  
TTCTTAGGGTATGTATATATATATATA
