# Supplementary material for: The genomic organization and expression pattern of the low-affinity Fc gamma receptors (FcγR) in the Göttingen minipig
Source: Springer Nature journal article supplement (doi:10.1007/s00251-018-01099-1), 2018-12-18

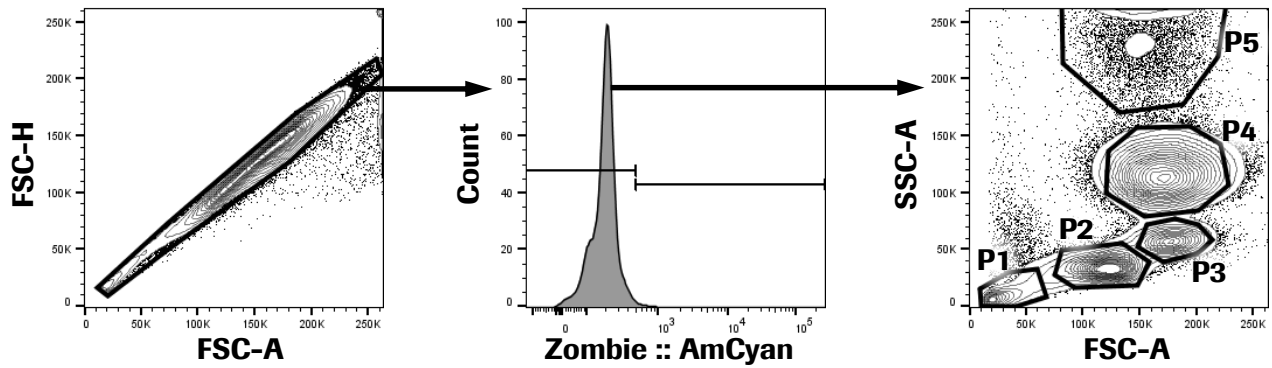

**P1 – Platelets**

**P2 – Lymphocytes**

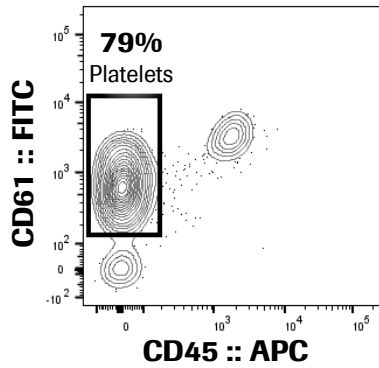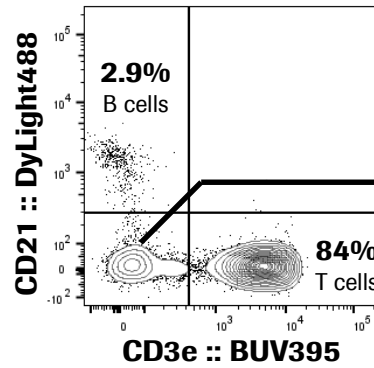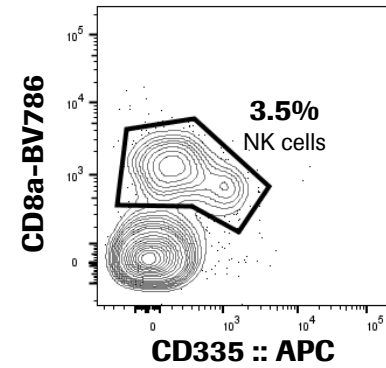

**P3 – Monocytes**

**P4 – Neutrophils**

**P5 – Eosinophils**

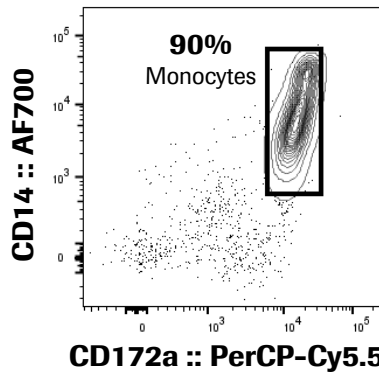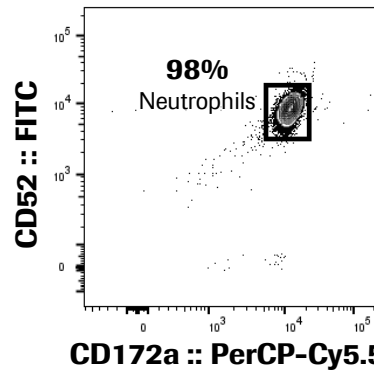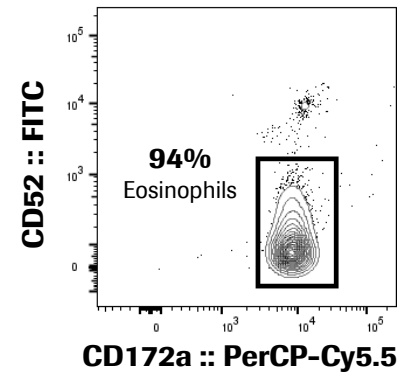

Supplement: 251_2018_1099_MOESM4_ESM.pdf [file 251_2018_1099_MOESM4_ESM.pdf]
